# Supplementary material for: I2-catalyzed tandem sp3C–H oxidation and annulation of aryl methyl ketones with amidoximes for the synthesis of 5-aroyl-1,2,4-oxadiazoles
Source: Royal Society of Chemistry journal article supplement (doi:10.1039/d4ob01221f), 2024-01-01
Supplement: d4ob01221f1.pdf [file d4ob01221f1.pdf]

## Supporting Information

### **I<sub>2</sub>-catalyzed tandem *sp*<sup>3</sup> C-H oxidation and annulation of aryl methyl ketones with amidoximes for the synthesis of 5-aryl-1, 2, 4-oxadiazoles**

Shiva Kumar Punna, Mariyaraj Arockiaraj and Venkatachalam Rajeshkumar\*

Organic Synthesis & Catalysis Lab, Department of Chemistry, National Institute of Technology Warangal, Hanumakonda - 506004, Telangana, INDIA.

E-mail: [rajeshv@nitw.ac.in](mailto:rajeshv@nitw.ac.in)

| <u>Table of Contents</u>                                                                                        | <u>Page No.</u> |
|-----------------------------------------------------------------------------------------------------------------|-----------------|
| ❖ General methods                                                                                               | 2               |
| ❖ Procedure for synthesis of <i>N</i> -(4-acetylphenyl)-2-(4-isobutylphenyl)propenamide ( <b>1aa</b> )          | 2               |
| ❖ General procedure for the synthesis of amidoximes <b>2a-q</b>                                                 | 3               |
| ❖ General procedure for the synthesis of 5-aryl-1, 2, 4-oxadiazoles <b>3a-j</b>                                 | 3               |
| ❖ Procedure for the synthesis of phenyl(3-phenyl-1,2,4-oxadiazol-5-yl)methanol <b>4</b>                         | 3-4             |
| ❖ Procedure for synthesis of 4-methoxy- <i>N</i> -(phenyl(3-phenyl-1,2,4-oxadiazol-5-yl)methyl)aniline <b>5</b> | 4-5             |
| ❖ Physical and spectroscopic data of all new compounds                                                          | 6-22            |
| ❖ Copies of <sup>1</sup> H and <sup>13</sup> C{ <sup>1</sup> H} NMR spectra of all new compounds                | 23-64           |
| ❖ X-ray crystal structure and data of compound <b>3y</b>                                                        | 65              |
| ❖ X-ray crystal structure and data of compound <b>3ag</b>                                                       | 66              |

## General Methods

We purchased commercially available chemicals from Alfa Aesar, Sigma-Aldrich, TCI, and Combi-Block and used them as received. We synthesized starting materials following the reported procedures. For reaction monitoring, thin-layer chromatography (TLC) was performed using Merck silica gel 60 F254 precoated plates (0.25 mm) and visualized with a UV lamp. Silica gel for column chromatography (particle size 100–200 mesh) was obtained from Finar. We recorded  $^1\text{H}$  and  $^{13}\text{C}$  NMR (nuclear magnetic resonance) spectra on a Bruker 400 MHz instrument, with chemical shifts reported in parts per million (ppm) relative to tetramethylsilane ( $\delta$  0.00), chloroform (7.26 ppm), or DMSO- $d_6$  (2.50 ppm).  $^1\text{H}$  NMR splitting patterns were designated as s (singlet), br s (broad singlet), d (doublet), t (triplet), q (quartet), dd (doublet of doublets), m (multiplet), etc.  $^{13}\text{C}$  NMR spectral values were reported relative to  $\text{CDCl}_3$  (77.16 ppm) or DMSO- $d_6$  (39.70 ppm). FT-IR spectra were recorded on a Perkin Elmer spectrometer and reported in the absorption frequency ( $\text{cm}^{-1}$ ). High-resolution mass spectrometry (HRMS) analysis was conducted using an Agilent Q-TOF 6230 instrument. Crystal data was collected using a Bruker Kappa APEX II CCD diffractometer.

### Procedure for synthesis of *N*-(4-acetylphenyl)-2-(4-isobutylphenyl)propenamide (**1aa**)<sup>1</sup>

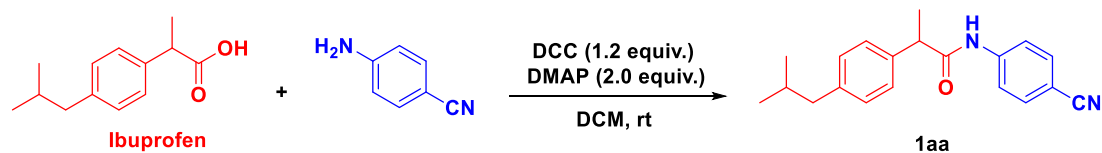

To the oven-dried round bottom flask equipped with a magnetic stir bar was added 4-aminoacetophenone (200 mg, 1.48 mmol, and 1.0 equiv.), ibuprofen (397 mg, 1.92 mmol, 1.3 equiv.), DMAP (362 mg, 2.96 mmol, 2.0 equiv.), DCC (366 mg, 1.78 mmol, 1.2 equiv.) and 10 mL of DCM. The resulting reaction mixture was stirred at room temperature, and the progress of the reaction was monitored by TLC. After the completion of the reaction (6 h), the reaction mixture was washed with water and extracted with EtOAc (3 x 20 mL). The combined organic layers were washed with brine, dried with anhydrous  $\text{Na}_2\text{SO}_4$ , and concentrated under a vacuum. The crude product was purified by silica gel column chromatography (eluent: petroleum ether/EtOAc = 9.5:0.5, v/v) to afford *N*-(4-acetylphenyl)-2-(4-isobutylphenyl)propenamide **1aa** as a white solid in 393 mg, 82% yield.

## General procedure for the synthesis of amidoximes (2a-q)<sup>2</sup>

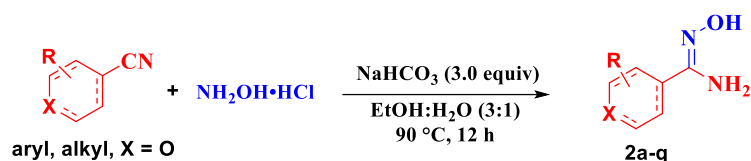

A round bottom flask containing the solution of tetrahydro-2*H*-pyran-4-carbonitrile (200 mg, 1.80 mmol, 1.0 equiv.), hydroxylamine hydrochloride (250 mg, 3.60 mmol, 2.0 equiv.) and NaHCO<sub>3</sub> (454 mg, 5.40 mmol, 3.0 equiv.) in 3:1 ratio of EtOH: H<sub>2</sub>O was heated with stirring in an oil bath at 90 °C. The progress of the reaction was monitored by TLC. After completion of the reaction (8 h), the reaction mixture was diluted with water (10 mL) and extracted with DCM (15 mL × 3). The organic phase was dried over Na<sub>2</sub>SO<sub>4</sub> and concentrated in a vacuum to afford *N*'-hydroxytetrahydro-2*H*-pyran-4-carboximidamide **2m** as an off-white solid in 231 mg, 89% yield. All other compounds **2a-q** were synthesized by following the same procedure.

## General procedure for the synthesis of 5-aryl-1, 2, 4-oxadiazoles (3a-aj)

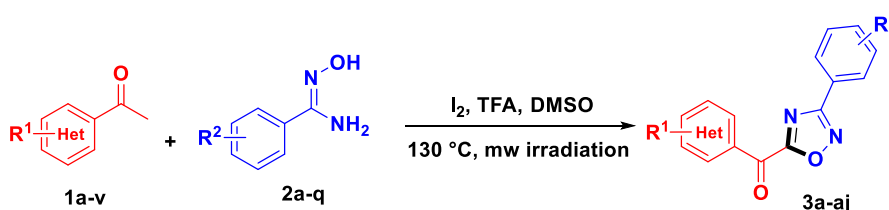

An oven dried 20 mL microwave vial was charged with acetophenone (100 mg, 0.83 mmol, 1.0 equiv.), *N*'-hydroxybenzimidamide (113 mg, 0.83 mmol, 1.0 equiv.), TFA (0.16 mL, 2.50 mmol), iodine (42.2 mg, 0.166 mmol, 0.2 equiv.) and 2 mL of DMSO. The resulting reaction mixture was subject to microwave irradiation at 130 °C. The progress of the reaction was monitored by TLC. After completion of the reaction (1 h), the reaction mixture was allowed to cool to room temperature, then washed with sodium thiosulphate to quench iodine and extracted with EtOAc (20 mL × 3). The combined organic layers were washed with brine, dried with Na<sub>2</sub>SO<sub>4</sub>, and the solvent was evaporated under a vacuum. The crude product was purified by column chromatography on silica gel (eluent: petroleum ether/EtOAc = 19:1, v/v) to afford pure product **3a** in 149 mg, 72% yield. All other compounds **3b-aj** were synthesized by following the same procedure.

## Procedure for the synthesis of phenyl(3-phenyl-1,2,4-oxadiazol-5-yl)methanol<sup>1</sup>

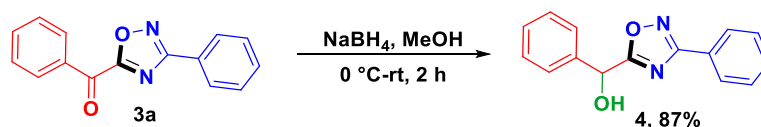

An oven-dried round bottom was charged with phenyl(3-phenyl-1,2,4-oxadiazol-5-yl)methanone (**3a**) (50 mg, 0.199 mmol, 1.0 equiv.), and 2 mL of MeOH. To this solution, sodium borohydride (11.3 mg, 0.299 mmol, 1.50 equiv.) was added. The resulting reaction mixture was stirred at room temperature, and the reaction progress was monitored by TLC. After completion of the reaction, the reaction mixture was quenched with H<sub>2</sub>O (8 mL) and extracted with ethyl acetate (3 × 10 mL). The combined organic layers were washed with brine (8 mL), dried with Na<sub>2</sub>SO<sub>4</sub>, and the solvent was evaporated under vacuum to afford crude compound. The crude product was purified by column chromatography on silica gel (Hexane/EtOAc) to afford pure product phenyl(3-phenyl-1,2,4-oxadiazol-5-yl)methanol **4** in 44 mg, 87% yield.

### Procedure for synthesis of 4-methoxy-*N*-(phenyl(3-phenyl-1,2,4-oxadiazol-5-yl)methyl)aniline<sup>3</sup>

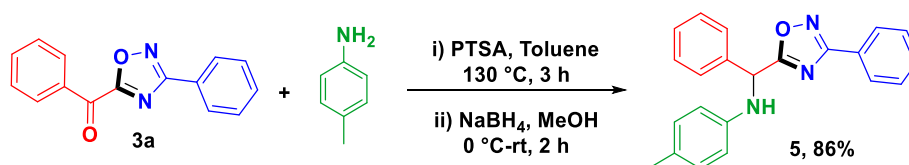

#### Step-1:

An oven-dried 25 mL of two neck round bottom flask equipped with Dean–Stark condenser and argon balloon was charged with phenyl(3-phenyl-1,2,4-oxadiazol-5-yl)methanone **3a** (100 mg, 0.399 mmol, 1.0 equiv.), *p*-methoxyaniline (69 mg, 0.399 mmol 1.0 equiv.) and PTSA (5 mg, 0.039 mmol, 0.1 equiv.) and 5 mL of toluene. The resulting reaction mixture was kept in an oil bath and stirred at 130 °C. After completion of the reaction, the mixture was allowed to cool to room temperature. The reaction mixture was quenched with H<sub>2</sub>O (10 mL), extracted with ethyl acetate (3 × 15 mL). The combined organic layers were washed with brine (10 mL), dried with Na<sub>2</sub>SO<sub>4</sub>, and the solvent was evaporated under vacuum to afford *N*-(4-methoxyphenyl)-1-phenyl-1-(3-phenyl-1,2,4-oxadiazol-5-yl)methanimine. The crude product was taken to next step without further purification.

#### Step-2:

An oven-dried 25 mL of two neck round bottom flask was charged with *N*-(4-methoxyphenyl)-1-phenyl-1-(3-phenyl-1,2,4-oxadiazol-5-yl)methanimine (142 mg, 0.399 mmol, 1.0 equiv.), sodium borohydride (23 mg, 0.599 mmol, 1.5 equiv.) and 5 mL of MeOH. The resulting reaction mixture was stirred at room temperature. After completion of the reaction, the reaction mixture was quenched with H<sub>2</sub>O (10 mL), extracted with ethyl acetate (3 × 15 mL). The combined organic layers were washed with brine (10 mL), dried with Na<sub>2</sub>SO<sub>4</sub>, and the solvent

was evaporated under vacuum. The crude product was purified by column chromatography on silica gel (Hexane/EtOAc) to afford pure product 4-methoxy-*N*-(phenyl(3-phenyl-1,2,4-oxadiazol-5-yl)methyl)aniline **5** in 122 mg, 86% yield.

*Aryl methyl ketones used in this work:*

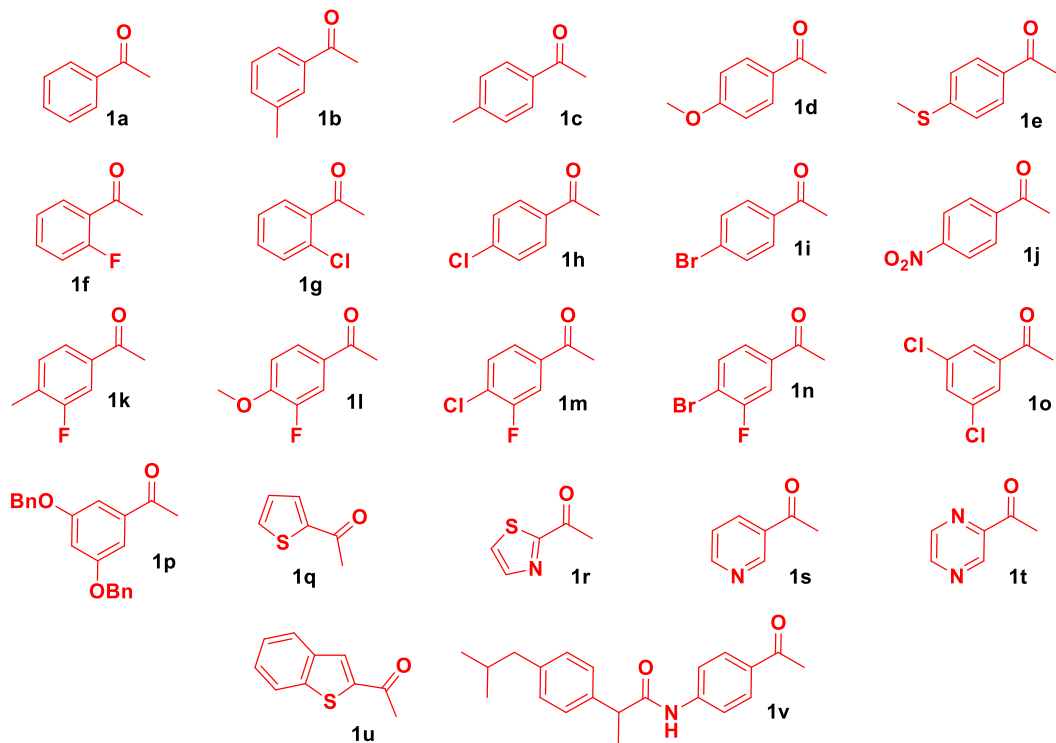

*Amidoximes used in this work:*

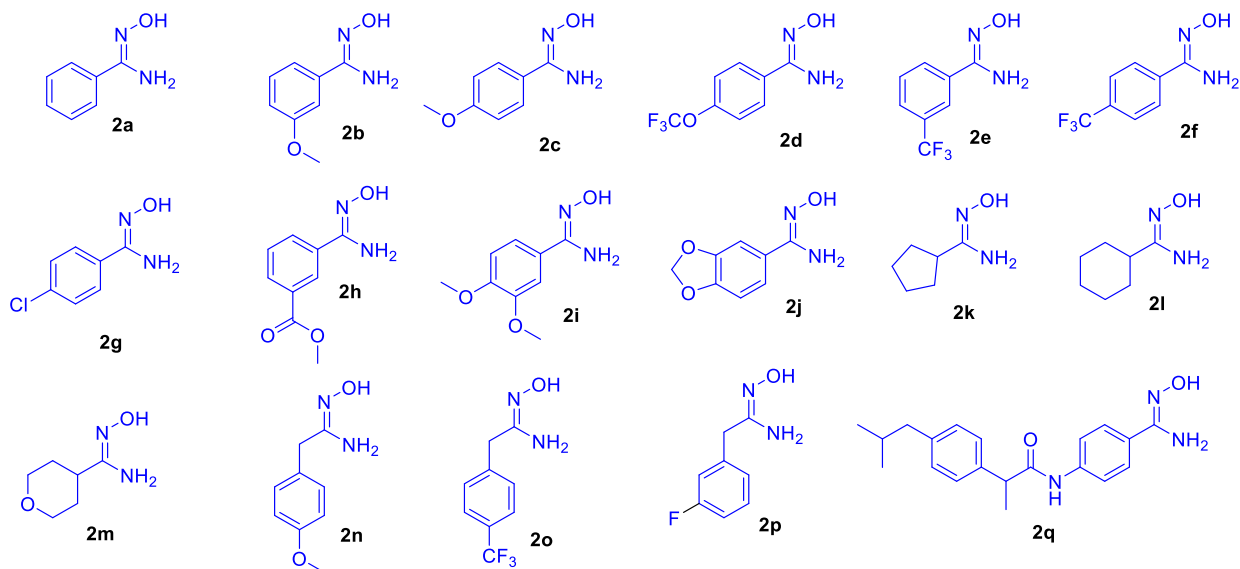

## Physical and spectroscopic characterization of compounds

### *N*-(4-Cyanophenyl)-2-(4-isobutylphenyl)propenamide (1aa)

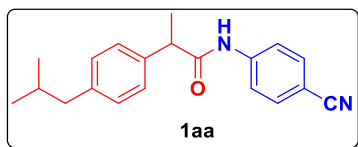

Purified by column chromatography eluting with petroleum ether/ethyl acetate = 9:1 (v/v); Off white solid; Yield: 354 mg, 68%; m.p: 119-120 °C;  $^1\text{H}$  NMR (400 MHz,  $\text{CDCl}_3$ )  $\delta$  7.62 – 7.52 (m, 4H), 7.47 (s, 1H), 7.27 (d,  $J$  = 8.1 Hz, 2H), 7.18 (d,  $J$  = 8.1 Hz, 2H), 3.74 (q,  $J$  = 7.1 Hz, 1H), 2.49 (d,  $J$  = 7.2 Hz, 2H), 1.93 – 1.83 (m, 1H), 1.60 (d,  $J$  = 7.1 Hz, 3H), 0.93 (d,  $J$  = 6.6 Hz, 6H);  $^{13}\text{C}$  NMR (101 MHz,  $\text{CDCl}_3$ )  $\delta$  173.2, 142.2, 141.5, 137.5, 133.3, 130.1, 127.5, 119.5, 119.0, 106.9, 47.9, 45.1, 30.3, 22.5, 18.5; FT-IR (KBr)  $\nu$  ( $\text{cm}^{-1}$ ) 3319, 3194, 3113, 2951, 2222, 1675, 1597, 1460; HRMS (ESI) (m/z)  $[\text{M} + \text{H}]^+$  calcd. for  $\text{C}_{20}\text{H}_{23}\text{N}_2\text{O}$ : 307.1810; found: 307.1810.

### *N'*-Hydroxycyclopentanecarboximidamide (2k):

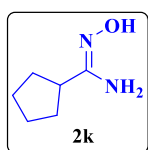

Purified by column chromatography eluting with petroleum ether/ethyl acetate = 7:3 (v/v); Grey solid; Yield: 238 mg, 88%; m.p: 77-78 °C;  $^1\text{H}$  NMR (400 MHz,  $\text{CDCl}_3$ )  $\delta$  6.89 (br s, 1H), 4.54 (br s, 2H), 2.64 – 2.52 (m, 1H), 1.95 – 1.83 (m, 2H), 1.74 – 1.54 (m, 6H);  $^{13}\text{C}\{^1\text{H}\}$  (100 MHz,  $\text{CDCl}_3$ )  $\delta$  156.8, 41.5, 30.1, 25.5; FT-IR (KBr)  $\nu$  ( $\text{cm}^{-1}$ ) 3464, 3361, 3185, 1661; HRMS (ESI) (m/z)  $[\text{M} + \text{H}]^+$  calcd. for  $\text{C}_6\text{H}_{13}\text{N}_2\text{O}$ : 129.1028; found: 129.1025.

### *N'*-Hydroxytetrahydro-2*H*-pyran-4-carboximidamide (2m):

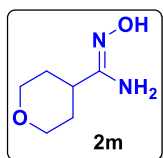

Purified by column chromatography eluting with DCM/MeOH = 9:1 (v/v); Off-white solid; Yield: 231 mg, 89%; m.p: 134-135 °C;  $^1\text{H}$  NMR (400 MHz,  $\text{DMSO}-d_6$ )  $\delta$  8.81 (s, 1H), 5.29 (s, 2H), 3.84 (dt,  $J$  = 11.4, 3.3 Hz, 2H), 3.33 – 3.21 (m, 2H), 2.28 – 2.15 (m, 1H), 1.61 – 1.57 (m, 4H);  $^{13}\text{C}\{^1\text{H}\}$  (100 MHz,  $\text{DMSO}-d_6$ )  $\delta$  155.3, 67.0, 37.4, 30.0; FT-IR (KBr)  $\nu$  ( $\text{cm}^{-1}$ ) 3454, 3408, 3353, 3196, 1388, 1268, 1240, 1120; HRMS (ESI) (m/z)  $[\text{M} + \text{H}]^+$  calcd. for  $\text{C}_6\text{H}_{13}\text{N}_2\text{O}_2$ : 145.0977; found: 145.0966.

***N*-4-(*N'*-Hydroxycarbamimidoyl)phenyl)-2-(4-isobutylphenyl)propenamide (2q):**

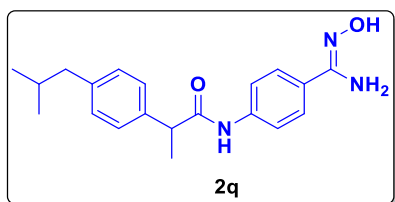

Purified by column chromatography eluting with petroleum ether/ethyl acetate = 7:3 (v/v); Off-white solid; Yield: 259 mg, 79%; m.p: 119-120 °C; <sup>1</sup>H NMR (400 MHz, DMSO-*d*<sub>6</sub>) δ 10.12 (s, 1H), 9.50 (s, 1H), 7.58 (s, 4H), 7.29 (d, *J* = 8.1 Hz, 2H), 7.10 (d, *J* = 8.2 Hz, 2H), 5.71 (s, 2H), 3.80 (q, *J* = 6.9 Hz, 1H), 2.40 (d, *J* = 7.1 Hz, 2H), 1.84 – 1.74(m, 1H), 1.39 (d, *J* = 7.0 Hz, 3H), 0.84 (d, *J* = 6.6 Hz, 6H); <sup>13</sup>C {<sup>1</sup>H} (100 MHz, DMSO-*d*<sub>6</sub>) δ 172.5, 150.5, 139.8, 139.6, 139.1, 129.0, 128.1, 127.0, 125.8, 118.6, 45.6, 44.3, 29.7, 22.2, 18.7; FT-IR (KBr) ν (cm<sup>-1</sup>) 3446, 3334, 3320, 3150, 3072, 2954, 2923, 1655, 1591, 1405; HRMS (ESI) (*m/z*) [*M* + *H*]<sup>+</sup> calcd. for C<sub>20</sub>H<sub>26</sub>N<sub>3</sub>O<sub>2</sub>: 340.2025; found: 340.2015.

**Phenyl(3-phenyl-1,2,4-oxadiazol-5-yl)methanone (3a):**

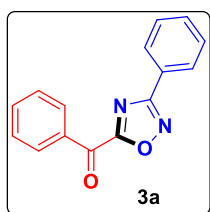

Purified by column chromatography eluting with petroleum ether/ethyl acetate = 19:1 (v/v); off-white solid; yield: 159 mg, 76%; m.p: 58-60 °C; <sup>1</sup>H NMR (400 MHz, CDCl<sub>3</sub>) δ 8.45 (dd, *J* = 8.5, 1.3 Hz, 2H), 8.18 (dd, *J* = 8.0, 1.7 Hz, 2H), 7.77 – 7.68 (m, 1H), 7.62 – 7.47 (m, 5H); <sup>13</sup>C {<sup>1</sup>H} (100 MHz, CDCl<sub>3</sub>) δ 178.4, 170.1, 169.0, 135.4, 134.1, 131.9, 131.0, 129.1, 129.0, 127.8, 126.0; FT-IR (KBr) ν (cm<sup>-1</sup>) 3071, 2926, 1671, 1594, 1555, 1468, 1447, 1316, 1298; HRMS (ESI) (*m/z*) [*M* + *H*]<sup>+</sup> calcd. for C<sub>15</sub>H<sub>11</sub>N<sub>2</sub>O<sub>2</sub>: 251.0821; found: 251.0827.

**(3-Phenyl-1,2,4-oxadiazol-5-yl)(*m*-tolyl)methanone (3b):**

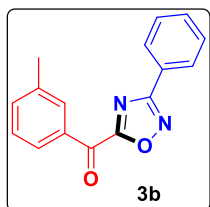

Purified by column chromatography eluting with petroleum ether/ethyl acetate = 19:1 (v/v); Off-white solid; Yield: 128 mg, 65%; m.p: 51-52 °C; <sup>1</sup>H NMR (400 MHz, CDCl<sub>3</sub>) δ 8.27 (d, *J* = 7.6 Hz, 1H), 8.20 – 8.17 (m, 3H), 7.58 – 7.49 (m, 4H), 7.46 (t, *J* = 7.7 Hz, 1H), 2.47 (s, 3H);

$^{13}\text{C}\{^1\text{H}\}$  (100 MHz,  $\text{CDCl}_3$ )  $\delta$  178.7, 170.3, 169.0, 139.0, 136.3, 134.2, 131.9, 131.1, 129.1, 128.9, 128.4, 127.8, 126.1, 21.5; FT-IR (KBr)  $\nu$  ( $\text{cm}^{-1}$ ) 3126, 3062, 2921, 1670, 1601, 1550, 1445, 1316, 1298; HRMS (ESI) ( $m/z$ )  $[\text{M} + \text{H}]^+$  calcd. for  $\text{C}_{16}\text{H}_{13}\text{N}_2\text{O}_2$ : 265.0977; found: 265.0978.

**(3-Phenyl-1,2,4-oxadiazol-5-yl)(*p*-tolyl)methanone (3c):**

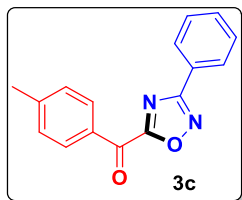

Purified by column chromatography eluting with petroleum ether/ethyl acetate = 19:1 (v/v); Off-white solid; Yield: 130 mg, 66%; m.p: 74-76 °C;  $^1\text{H}$  NMR (400 MHz,  $\text{CDCl}_3$ )  $\delta$  8.34 (d,  $J$  = 8.2 Hz, 2H), 8.21 – 8.14 (m, 2H), 7.56 – 7.48 (m, 3H), 7.35 (d,  $J$  = 7.8 Hz, 2H), 2.45 (s, 3H);  $^{13}\text{C}\{^1\text{H}\}$  (100 MHz,  $\text{CDCl}_3$ )  $\delta$  178.0, 170.3, 168.9, 146.8, 131.8, 131.7, 131.1, 129.7, 129.1, 127.7, 126.1, 22.0; FT-IR (KBr)  $\nu$  ( $\text{cm}^{-1}$ ) 3124, 3039, 2917, 1665, 1605, 1551, 1443, 1316, 1298; HRMS (ESI) ( $m/z$ )  $[\text{M} + \text{H}]^+$  calcd. for  $\text{C}_{16}\text{H}_{13}\text{N}_2\text{O}_2$ : 265.0977; found: 265.0979.

**(4-Methoxyphenyl)(3-phenyl-1,2,4-oxadiazol-5-yl)methanone (3d):**

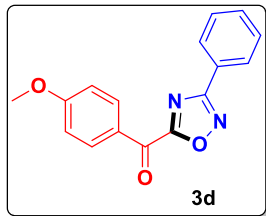

Purified by column chromatography eluting with petroleum ether/ethyl acetate = 19:1 (v/v); off-white solid; yield: 142 mg, 76%; m.p: 85-87 °C;  $^1\text{H}$  NMR (400 MHz,  $\text{CDCl}_3$ )  $\delta$  8.48 (d,  $J$  = 9.0 Hz, 2H), 8.19 (dd,  $J$  = 8.0, 1.7 Hz, 2H), 7.58 – 7.50 (m, 3H), 7.04 (d,  $J$  = 9.0 Hz, 2H), 3.93 (s, 3H);  $^{13}\text{C}\{^1\text{H}\}$  (100 MHz,  $\text{CDCl}_3$ )  $\delta$  176.8, 170.6, 168.9, 165.6, 133.7, 131.8, 129.1, 127.8, 127.2, 126.2, 114.5, 55.8; FT-IR (KBr)  $\nu$  ( $\text{cm}^{-1}$ ) 3133, 3090, 2935, 2843, 1658, 1595, 1550, 1448, 1320, 1266; HRMS (ESI) ( $m/z$ )  $[\text{M} + \text{H}]^+$  calcd. for  $\text{C}_{16}\text{H}_{13}\text{N}_2\text{O}_3$ : 281.0926; found: 281.0931.

**(4-(Methylthio)phenyl)(3-phenyl-1,2,4-oxadiazol-5-yl)methanone (3e):**

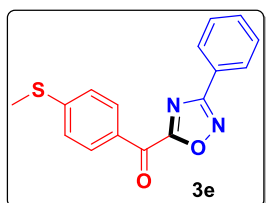



Purified by column chromatography eluting with petroleum ether/ethyl acetate = 8:2 (v/v); Yellow solid; Yield: 137 mg, 77%; m.p: 57-59 °C;  $^1\text{H}$  NMR (400 MHz,  $\text{CDCl}_3$ )  $\delta$  8.39 (d,  $J$  = 8.7 Hz, 2H), 8.18 (dd,  $J$  = 8.0, 1.7 Hz, 2H), 7.57 – 7.49 (m, 3H), 7.35 (d,  $J$  = 8.7 Hz, 2H), 2.56 (s, 3H);  $^{13}\text{C}\{^1\text{H}\}$  (100 MHz,  $\text{CDCl}_3$ )  $\delta$  177.1, 170.3, 168.9, 149.8, 131.8, 131.2, 130.2, 129.1, 127.7, 126.1, 124.9, 14.6; FT-IR (KBr)  $\nu$  ( $\text{cm}^{-1}$ ) 3135, 3090, 2991, 2921, 1650, 1581, 1437, 1358, 966; HRMS (ESI) ( $m/z$ )  $[\text{M} + \text{H}]^+$  calcd. for  $\text{C}_{16}\text{H}_{13}\text{N}_2\text{O}_2\text{S}$ : 297.0698; found: 297.0696.

**(4-Chlorophenyl)(3-phenyl-1,2,4-oxadiazol-5-yl)methanone (3f):**

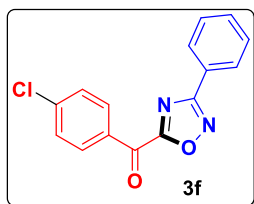

Purified by column chromatography eluting with petroleum ether/ethyl acetate = 19:1 (v/v); Off-white solid; Yield: 116 mg, 63%; m.p: 92-94 °C;  $^1\text{H}$  NMR (400 MHz,  $\text{CDCl}_3$ )  $\delta$  8.45 (d,  $J$  = 8.7 Hz, 2H), 8.16 (d,  $J$  = 6.8 Hz, 2H), 7.59 – 7.48 (m, 5H);  $^{13}\text{C}\{^1\text{H}\}$  (100 MHz,  $\text{CDCl}_3$ )  $\delta$  177.1, 169.8, 169.1, 142.3, 132.5, 132.4, 132.0, 129.5, 129.2, 127.8, 125.9; FT-IR (KBr)  $\nu$  ( $\text{cm}^{-1}$ ) 3088, 2962, 1664, 1586, 1553, 1462, 1403, 1314, 1298, 715, 695; HRMS (ESI) ( $m/z$ )  $[\text{M} + \text{H}]^+$  calcd. for  $\text{C}_{15}\text{H}_{10}\text{ClN}_2\text{O}_2$ : 285.0431; found: 285.0433.

**(4-Bromophenyl)(3-phenyl-1,2,4-oxadiazol-5-yl)methanone (3g):**

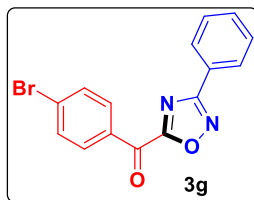

Purified by column chromatography eluting with petroleum ether/ethyl acetate = 19:1 (v/v); Off-white solid; Yield: 113 mg, 68%; m.p: 97-98 °C;  $^1\text{H}$  NMR (400 MHz,  $\text{CDCl}_3$ )  $\delta$  8.37 (d,  $J$  = 8.7 Hz, 2H), 8.20 – 8.14 (m, 2H), 7.73 (d,  $J$  = 8.7 Hz, 2H), 7.58 – 7.50 (m, 3H);  $^{13}\text{C}\{^1\text{H}\}$  (100 MHz,  $\text{CDCl}_3$ )  $\delta$  177.3, 169.8, 169.1, 132.9, 132.5, 132.4, 132.0, 131.3, 129.2, 127.8, 125.9; FT-IR (KBr)  $\nu$  ( $\text{cm}^{-1}$ ) 3062, 2921, 1670, 1601, 1550, 1467, 1316, 1227, 684; HRMS (ESI) ( $m/z$ )  $[\text{M} + \text{H}]^+$  calcd. for  $\text{C}_{15}\text{H}_{10}\text{BrN}_2\text{O}_2$ : 328.9926; found: 328.9917.

**(4-Nitrophenyl)(3-phenyl-1,2,4-oxadiazol-5-yl)methanone (3h):**

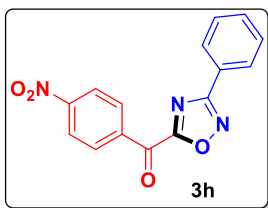

Purified by column chromatography eluting with petroleum ether/ethyl acetate = 19:1 (v/v); Off-white solid; Yield: 109 mg, 61%; m.p: 102-104 °C;  $^1\text{H}$  NMR (400 MHz,  $\text{CDCl}_3$ )  $\delta$  8.73 (d,  $J = 9.1$  Hz, 2H), 8.44 (d,  $J = 9.1$  Hz, 2H), 8.19 (dd,  $J = 8.1, 1.6$  Hz, 2H), 7.61 – 7.53 (m, 3H);  $^{13}\text{C}\{^1\text{H}\}$  (100 MHz,  $\text{CDCl}_3$ )  $\delta$  176.7, 169.4, 169.2, 151.5, 138.5, 132.3, 132.2, 129.3, 127.8, 125.7, 124.1; FT-IR (KBr)  $\nu$  ( $\text{cm}^{-1}$ ) 3055, 2956, 1672, 1603, 1524, 1447, 1339, 1317; HRMS (ESI) (m/z)  $[\text{M} + \text{H}]^+$  calcd. for  $\text{C}_{15}\text{H}_{10}\text{N}_3\text{O}_4$ : 296.0671; found: 296.0677.

**(3-Fluoro-4-methylphenyl)(3-phenyl-1,2,4-oxadiazol-5-yl)methanone (3i)**

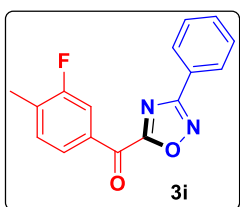

Purified by column chromatography eluting with petroleum ether/ethyl acetate = 19:1 (v/v); Off-white solid; Yield: 123 mg, 66%; m.p: 109-111 °C;  $^1\text{H}$  NMR (400 MHz,  $\text{CDCl}_3$ )  $\delta$  8.22 – 8.12(m, 4H), 7.60 – 7.48 (m, 3H), 7.39 (t,  $J = 7.1$  Hz, 1H), 2.40 (s, 3H);  $^{13}\text{C}\{^1\text{H}\}$  (100 MHz,  $\text{CDCl}_3$ )  $\delta$  176.8, 169.8, 169.0, 161.2 (d,  $J = 250.0$  Hz), 133.9 (d,  $J = 10.0$  Hz), 133.6 (d,  $J = 7.7$  Hz), 132.1 (d,  $J = 10.0$  Hz), 132.0, 129.2, 127.8, 126.7 (d,  $J = 20.0$  Hz), 126.0, 117.2 (d,  $J = 20.0$  Hz), 15.3 (d,  $J = 3.7$  Hz); FT-IR (KBr)  $\nu$  ( $\text{cm}^{-1}$ ) 3103, 3034, 2954, 1646, 1615, 1572, 1553, 1465, 1320, 1300, 1277, 1028; HRMS (ESI) (m/z)  $[\text{M} + \text{H}]^+$  calcd. for  $\text{C}_{16}\text{H}_{12}\text{FN}_2\text{O}_2$ : 283.0883; found: 285.0888.

**(3-Fluoro-4-methoxyphenyl)(3-phenyl-1,2,4-oxadiazol-5-yl)methanone (3j):**

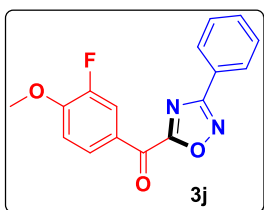

Purified by column chromatography eluting with petroleum ether/ethyl acetate = 9:1 (v/v); Off-white solid; Yield: 121 mg, 68%; m.p: 102-104 °C;  $^1\text{H}$  NMR (400 MHz,  $\text{CDCl}_3$ )  $\delta$  8.39 (ddd,  $J = 8.7, 2.2, 1.2$  Hz, 1H), 8.26 (dd,  $J = 11.8, 2.2$  Hz, 1H), 8.20 – 8.14 (m, 2H), 7.59 – 7.49 (m, 3H), 7.11 (t,  $J = 8.4$  Hz, 1H), 4.02 (s, 3H);  $^{13}\text{C}\{^1\text{H}\}$  (100 MHz,  $\text{CDCl}_3$ )  $\delta$  175.7 (d,  $J = 2.6$  Hz),

170.0, 169.0, 154.0 (d,  $J = 10.0$  Hz), 152.0 (d,  $J = 250$  Hz), 131.9, 129.4 (d,  $J = 3.5$  Hz), 129.1, 127.7, 127.1 (d,  $J = 10.0$  Hz), 126.0, 118.3 (d,  $J = 20.0$  Hz), 112.7 (d,  $J = 1.9$  Hz), 56.6; FT-IR (KBr)  $\nu$  ( $\text{cm}^{-1}$ ) 3166, 3026, 2977, 1662, 1608, 1555, 1516, 1466, 1320, 1285, 1013; HRMS (ESI) ( $m/z$ )  $[\text{M} + \text{H}]^+$  calcd. for  $\text{C}_{16}\text{H}_{12}\text{FN}_2\text{O}_3$ : 299.0832; found: 299.0838.

**(4-Chloro-3-fluorophenyl)(3-phenyl-1,2,4-oxadiazol-5-yl)methanone (3k):**

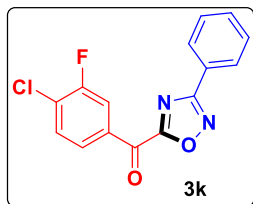

Purified by column chromatography eluting with petroleum ether/ethyl acetate = 19:1 (v/v); off-white solid; yield: 120 mg, 68%; m.p: 79-81 °C;  $^1\text{H}$  NMR (400 MHz,  $\text{CDCl}_3$ )  $\delta$  8.35 (dd,  $J = 9.5, 1.9$  Hz, 1H), 8.31 (ddd,  $J = 8.4, 2.0, 0.8$  Hz, 1H), 8.19 – 8.14 (m, 2H), 7.63 (dd,  $J = 8.4, 7.1$  Hz, 1H), 7.59 – 7.50 (m, 3H);  $^{13}\text{C}\{^1\text{H}\}$  (100 MHz,  $\text{CDCl}_3$ ) 175.9 (d,  $J = 2.3$  Hz), 169.4, 169.2, 158.2 (d,  $J = 250$  Hz), 134.0 (d,  $J = 6.2$  Hz), 132.1, 131.5, 129.4 (d,  $J = 20.0$  Hz), 129.2, 127.8, 127.5 (d,  $J = 4.1$  Hz), 125.8, 118.8 (d,  $J = 20.0$  Hz); FT-IR (KBr)  $\nu$  ( $\text{cm}^{-1}$ ) 3091, 3041, 1681, 1595, 1573, 1549, 1486, 1444, 1419, 1353, 1277, 1257, 714, 689; HRMS (ESI) ( $m/z$ )  $[\text{M} + \text{H}]^+$  calcd. for  $\text{C}_{15}\text{H}_9\text{ClFN}_2\text{O}_2$ : 303.0337; found: 303.0339.

**(4-Bromo-3-fluorophenyl)(3-phenyl-1,2,4-oxadiazol-5-yl)methanone (3l):**

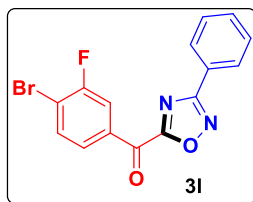

Purified by column chromatography eluting with petroleum ether/ethyl acetate = 19:1 (v/v); off-white solid; yield: 104 mg, 65%; m.p: 89-91 °C;  $^1\text{H}$  NMR (400 MHz,  $\text{CDCl}_3$ )  $\delta$  8.31 (dd,  $J = 9.1, 1.7$  Hz, 1H), 8.25 – 8.20 (m, 1H), 8.20 – 8.14 (m, 2H), 7.81 (ddd,  $J = 8.3, 6.8, 1.6$  Hz, 1H), 7.61 – 7.50 (m, 3H);  $^{13}\text{C}\{^1\text{H}\}$  (100 MHz,  $\text{CDCl}_3$ )  $\delta$  176.1, 169.4, 169.2, 159.4 (d,  $J = 250$  Hz), 134.8 (d,  $J = 5.3$  Hz), 134.5, 132.1, 129.2, 127.8, 127.6 (d,  $J = 3.9$  Hz), 125.8, 118.5 (d,  $J = 20.0$  Hz), 118.2 (d,  $J = 20.0$  Hz); FT-IR (KBr)  $\nu$  ( $\text{cm}^{-1}$ ) 3073, 3049, 1677, 1593, 1554, 1476, 1445, 1319, 1235, 1043, 821, 691, 548; HRMS (ESI) ( $m/z$ )  $[\text{M} + \text{H}]^+$  calcd. for  $\text{C}_{15}\text{H}_9\text{BrFN}_2\text{O}_2$ : 346.9831; found: 346.9831.

**(3,5-Dichlorophenyl)(3-phenyl-1,2,4-oxadiazol-5-yl)methanone (3m):**

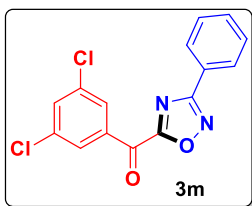

Purified by column chromatography eluting with petroleum ether/ethyl acetate = 9:1 (v/v); Off-white solid; Yield: 132 mg, 78%; m.p: 96-98 °C;  $^1\text{H}$  NMR (400 MHz,  $\text{CDCl}_3$ )  $\delta$  8.41 (d,  $J$  = 1.9 Hz, 2H), 8.19 – 8.16 (m, 2H), 7.70 (t,  $J$  = 1.9 Hz, 1H), 7.59 – 7.52 (m, 3H);  $^{13}\text{C}\{^1\text{H}\}$  (100 MHz,  $\text{CDCl}_3$ )  $\delta$  175.8, 169.3, 169.1, 136.3, 136.1, 134.9, 132.2, 129.3 (2C), 127.8, 125.7; FT-IR (KBr)  $\nu$  ( $\text{cm}^{-1}$ ) 3077, 3071, 1689, 1558, 1466, 1391, 1317, 1286, 715, 688; HRMS (ESI) (m/z)  $[\text{M} + \text{H}]^+$  calcd. for  $\text{C}_{15}\text{H}_9\text{Cl}_2\text{N}_2\text{O}_2$ : 319.0041; found: 319.0040.

**(3,5-Bis(benzyloxy)phenyl)(3-phenyl-1,2,4-oxadiazol-5-yl)methanone (3n):**

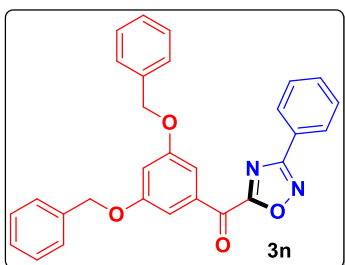

Purified by column chromatography eluting with petroleum ether/ethyl acetate = 9:1 (v/v); Yellow solid; Yield: 106 mg, 76%; m.p: 97-99 °C;  $^1\text{H}$  NMR (400 MHz,  $\text{CDCl}_3$ )  $\delta$  8.16 (dd,  $J$  = 8.0, 1.7 Hz, 2H), 7.69 (d,  $J$  = 2.3 Hz, 2H), 7.57 – 7.50 (m, 3H), 7.46 – 7.42 (m, 4H), 7.39 (ddd,  $J$  = 7.9, 6.8, 1.1 Hz, 4H), 7.36 – 7.31 (m, 2H), 6.96 (t,  $J$  = 2.3 Hz, 1H), 5.13 (s, 4H);  $^{13}\text{C}\{^1\text{H}\}$  (100 MHz,  $\text{CDCl}_3$ )  $\delta$  178.2, 170.2, 169.0, 160.3, 136.3, 135.8, 131.9, 129.2, 128.8, 128.4, 127.9, 127.8, 127.7, 126.1, 109.8, 70.6; FT-IR (KBr)  $\nu$  ( $\text{cm}^{-1}$ ) 3103, 3058, 3034, 2963, 1671, 1591, 1554, 1468, 1380, 1317, 1300, 1273, 1178; HRMS (ESI) (m/z)  $[\text{M} + \text{H}]^+$  calcd. for  $\text{C}_{29}\text{H}_{23}\text{N}_2\text{O}_4$ : 463.1658; found: 463.1658.

**(3-Phenyl-1,2,4-oxadiazol-5-yl)(thiophen-2-yl)methanone (3o):**

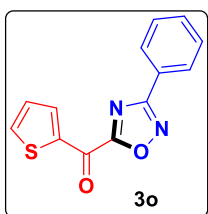

Purified by column chromatography eluting with petroleum ether/ethyl acetate = 8:2 (v/v); Yellow solid; Yield: 173 mg, 85%; m.p: 87-89 °C;  $^1\text{H}$  NMR (400 MHz,  $\text{CDCl}_3$ )  $\delta$  8.68 – 8.63 (m, 1H), 8.18 (dt,  $J$  = 8.2, 1.8 Hz, 2H), 7.92 (dt,  $J$  = 4.9, 1.2 Hz, 1H), 7.59 – 7.49 (m, 3H), 7.29

(ddd,  $J = 5.0, 3.9, 1.3$  Hz, 1H);  $^{13}\text{C}\{^1\text{H}\}$  (100 MHz,  $\text{CDCl}_3$ )  $\delta$  169.7, 169.6, 169.1, 140.3, 138.4, 138.3, 131.9, 129.1, 129.0, 127.7, 125.9; FT-IR (KBr)  $\nu$  ( $\text{cm}^{-1}$ ) 3085, 2922, 1645, 1551, 1516, 1439, 1348, 1290, 1047, 922; HRMS (ESI) ( $m/z$ )  $[\text{M} + \text{H}]^+$  calcd. for  $\text{C}_{13}\text{H}_9\text{N}_2\text{O}_2\text{S}$ : 257.0385; found: 257.0370.

**(3-Phenyl-1,2,4-oxadiazol-5-yl)(thiazol-2-yl)methanone (3p):**

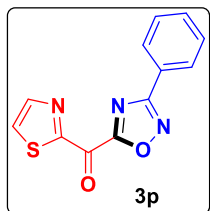

Purified by column chromatography eluting with petroleum ether/ethyl acetate = 8:2 (v/v); Yellow solid; Yield: 166 mg, 82%; m.p: 67-68 °C;  $^1\text{H}$  NMR (400 MHz,  $\text{CDCl}_3$ )  $\delta$  8.30 (d,  $J = 2.9$  Hz, 1H), 8.22 – 8.19 (m, 2H), 7.97 (d,  $J = 2.9$  Hz, 1H), 7.57 – 7.51 (m, 3H);  $^{13}\text{C}\{^1\text{H}\}$  (100 MHz,  $\text{CDCl}_3$ )  $\delta$  170.1, 169.4, 169.3, 162.2, 146.8, 132.0, 129.2, 129.1, 127.9, 125.8; FT-IR (KBr)  $\nu$  ( $\text{cm}^{-1}$ ) 3098, 2924, 1664, 1550, 1443, 1352, 1286; HRMS (ESI) ( $m/z$ )  $[\text{M} + \text{H}]^+$  calcd. for  $\text{C}_{12}\text{H}_8\text{N}_3\text{O}_2\text{S}$ : 258.0337; found: 258.0340.

**(3-Phenyl-1,2,4-oxadiazol-5-yl)(pyridin-3-yl)methanone (3q):**

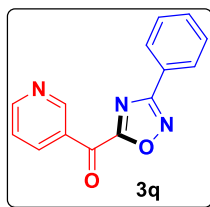

Purified by column chromatography eluting with petroleum ether/ethyl acetate = 8:2 (v/v); Yellow solid; Yield: 79 mg, 38%; m.p: 52-54 °C;  $^1\text{H}$  NMR (400 MHz,  $\text{CDCl}_3$ )  $\delta$  9.77 (d,  $J = 2.2$  Hz, 1H), 8.94 (dd,  $J = 4.8, 1.7$  Hz, 1H), 8.77 (dt,  $J = 8.1, 2.0$  Hz, 1H), 8.19 (dt,  $J = 8.1, 1.2$  Hz, 2H), 7.60 – 7.51 (m, 4H);  $^{13}\text{C}\{^1\text{H}\}$  (100 MHz,  $\text{CDCl}_3$ )  $\delta$  177.1, 169.3, 155.2, 152.2, 138.1, 132.1, 130.0, 129.2 (2C), 127.8, 125.8, 123.9; FT-IR (KBr)  $\nu$  ( $\text{cm}^{-1}$ ) 3044, 2921, 1679, 1583, 1446, 1320, 1204; HRMS (ESI) ( $m/z$ )  $[\text{M} + \text{H}]^+$  calcd. for  $\text{C}_{14}\text{H}_{10}\text{N}_3\text{O}_2$ : 252.0773; found: 252.0763.

**(3-Phenyl-1,2,4-oxadiazol-5-yl)(pyrazin-2-yl)methanone (3r):**

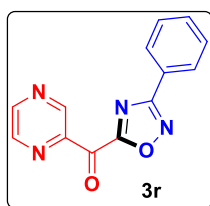

Purified by column chromatography eluting with petroleum ether/ethyl acetate = 7:3 (v/v); Yellow solid; Yield: 75 mg, 36%; m.p: 127-129 °C; <sup>1</sup>H NMR (400 MHz, CDCl<sub>3</sub>) δ 9.57 (d, *J* = 1.5 Hz, 1H), 8.92 (d, *J* = 2.4 Hz, 1H), 8.84 (dd, *J* = 2.4, 1.5 Hz, 1H), 8.22 – 8.13 (m, 2H), 7.59 – 7.49 (m, 3H); <sup>13</sup>C {<sup>1</sup>H} (100 MHz, CDCl<sub>3</sub>) δ 178.6, 169.9, 169.2, 149.0, 146.6, 146.3, 144.6, 132.0, 129.2, 127.9, 125.8; FT-IR (KBr) ν (cm<sup>-1</sup>) 3014, 2968, 1689, 1562, 1519, 1440, 1316, 1216; HRMS (ESI) (m/z) [M + H]<sup>+</sup> calcd. for C<sub>13</sub>H<sub>9</sub>N<sub>4</sub>O<sub>2</sub>: 253.0726; found: 253.0729.

**Benzo[*b*]thiophen-2-yl(3-phenyl-1,2,4-oxadiazol-5-yl)methanone (3s):**

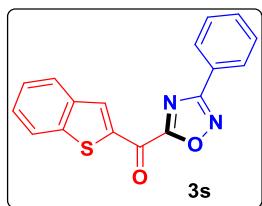

Purified by column chromatography eluting with petroleum ether/ethyl acetate = 8:2 (v/v); Off-white solid; Yield: 125 mg, 72%; m.p: 135-137 °C; <sup>1</sup>H NMR (400 MHz, CDCl<sub>3</sub>) δ 8.99 (d, *J* = 0.8 Hz, 1H), 8.26 – 8.20 (m, 2H), 8.04 (d, *J* = 8.1 Hz, 1H), 7.93 (dq, *J* = 8.2, 0.9 Hz, 1H), 7.60 – 7.53 (m, 4H), 7.48 (ddd, *J* = 8.1, 7.1, 1.1 Hz, 1H); <sup>13</sup>C {<sup>1</sup>H} (100 MHz, CDCl<sub>3</sub>) δ 171.4, 169.5, 169.3, 144.3, 140.0, 139.2, 136.3, 132.1, 129.2, 129.1, 127.9, 127.4, 126.0, 125.7, 123.1; FT-IR (KBr) ν (cm<sup>-1</sup>) 3090, 2923, 1647, 1556, 1495, 1443, 1333, 1292, 1074, 919; HRMS (ESI) (m/z) [M + H]<sup>+</sup> calcd. for C<sub>17</sub>H<sub>11</sub>N<sub>2</sub>O<sub>2</sub>S: 307.0541; found: 307.0539.

**2-(4-Isobutylphenyl)-*N*-(4-(3-phenyl-1,2,4-oxadiazole-5-carbonyl)phenyl)propanamide (3t):**

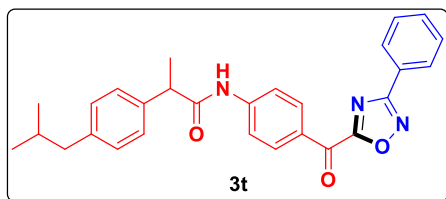

Purified by column chromatography eluting with petroleum ether/ethyl acetate = 8:2 (v/v); Yellow solid; Yield: 44 mg, 31%; m.p: 140-141 °C; <sup>1</sup>H NMR (400 MHz, CDCl<sub>3</sub>) δ 8.48 – 8.40 (m, 2H), 8.10 (d, *J* = 8.8 Hz, 2H), 7.76 – 7.70 (m, 1H), 7.61 – 7.57 (m, 4H), 7.28 (d, *J* = 8.1 Hz, 2H), 7.22 (s, 1H), 7.18 (d, *J* = 8.1 Hz, 2H), 3.73 (q, *J* = 7.2 Hz, 1H), 2.49 (d, *J* = 7.2 Hz, 2H), 1.93 – 1.83 (m, 1H), 1.62 (d, *J* = 7.2 Hz, 3H), 0.92 (d, *J* = 6.6 Hz, 6H); <sup>13</sup>C {<sup>1</sup>H} (100 MHz, CDCl<sub>3</sub>) δ 178.6, 172.9, 170.1, 168.5, 141.5, 141.2, 137.8, 135.4, 134.2, 131.0, 130.2, 129.1, 128.8, 127.6, 121.5, 119.6, 48.1, 45.2, 30.3, 22.5, 18.6; FT-IR (KBr) ν (cm<sup>-1</sup>) 3356, 3156,

3050, 2955, 1648, 1579, 1513, 1467, 1320, 1261, 1156; HRMS (ESI) (m/z) [M + H]<sup>+</sup> calcd. for C<sub>28</sub>H<sub>28</sub>N<sub>3</sub>O<sub>3</sub>: 454.2131; found: 454.2117.

**(4-Chloro-3-fluorophenyl)(3-(3-methoxyphenyl)-1,2,4-oxadiazol-5-yl)methanone (3u):**

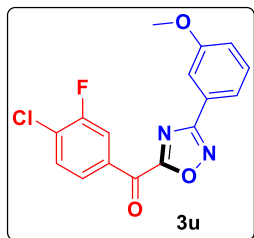

Purified by column chromatography eluting with petroleum ether/ethyl acetate = 9:1 (v/v); Off-white solid; Yield: 122 mg, 63%; m.p: 52-54 °C; <sup>1</sup>H NMR (400 MHz, CDCl<sub>3</sub>) δ 8.38 – 8.27 (m, 2H), 7.77 (td, *J* = 8.0, 1.2 Hz, 1H), 7.68 (dd, *J* = 2.7, 1.5 Hz, 1H), 7.64 (dd, *J* = 8.4, 7.0 Hz, 1H), 7.45 (t, *J* = 8.0 Hz, 1H), 7.11 (ddd, *J* = 8.3, 2.7, 1.0 Hz, 1H), 3.90 (s, 3H); <sup>13</sup>C {<sup>1</sup>H} (100 MHz, CDCl<sub>3</sub>) δ 176.0 (d, *J* = 1.9 Hz), 169.4, 169.2, 160.2, 158.3 (d, *J* = 250 Hz), 134.0 (d, *J* = 10.0 Hz), 131.5, 130.4, 129.4 (d, *J* = 20.0 Hz), 127.5 (d, *J* = 10.0 Hz), 127.0, 120.3, 118.8 (d, *J* = 20.0 Hz), 118.3, 112.6, 55.7; FT-IR (KBr) ν (cm<sup>-1</sup>) 3102, 3046, 3013, 2996, 1674, 1601, 1574, 1518, 1469, 1309, 1239, 1031, 904, 798, 683; HRMS (ESI) (m/z) [M + H]<sup>+</sup> calcd. for C<sub>16</sub>H<sub>11</sub>ClFN<sub>2</sub>O<sub>3</sub>: 333.0442; found: 333.0467.

**(4-Bromo-3-fluorophenyl)(3-(4-methoxyphenyl)-1,2,4-oxadiazol-5-yl)methanone (3v):**

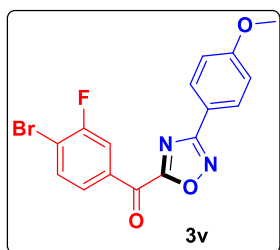

Purified by column chromatography eluting with petroleum ether/ethyl acetate = 9:1 (v/v); Off-white solid; Yield: 125 mg, 72%; m.p: 88-90 °C; <sup>1</sup>H NMR (400 MHz, CDCl<sub>3</sub>) δ 8.31 (dd, *J* = 9.0, 2.0 Hz, 1H), 8.22 (ddd, *J* = 8.3, 2.0, 0.7 Hz, 1H), 8.11 (d, *J* = 8.9 Hz, 2H), 7.80 (dd, *J* = 8.4, 6.7 Hz, 1H), 7.04 (d, *J* = 8.9 Hz, 2H), 3.90 (s, 3H); <sup>13</sup>C {<sup>1</sup>H} (100 MHz, CDCl<sub>3</sub>) δ 176.2 (d, *J* = 1.9 Hz), 169.2, 168.9, 162.7, 159.3 (d, *J* = 250 Hz), 134.9 (d, *J* = 6.2 Hz), 134.5, 129.5, 127.6 (d, *J* = 10.0 Hz), 118.6 (d, *J* = 30.0 Hz), 118.2, 118.1 (d, *J* = 30.0 Hz), 114.7, 55.6; FT-IR (KBr) ν (cm<sup>-1</sup>) 3148, 3095, 3018, 2985, 1666, 1615, 1468, 1417, 1311, 1253, 1049, 622; HRMS (ESI) (m/z) [M + H]<sup>+</sup> calcd. for C<sub>16</sub>H<sub>11</sub>BrFN<sub>2</sub>O<sub>3</sub>: 376.9937; found: 376.9959.

***p*-Tolyl(3-(4-(trifluoromethoxy)phenyl)-1,2,4-oxadiazol-5-yl)methanone (3w):**

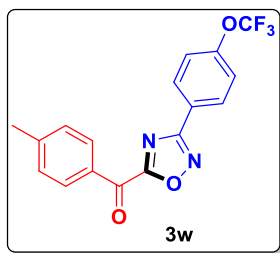

Purified by column chromatography eluting with petroleum ether/ethyl acetate = 9:1 (v/v); off-white solid; Yield: 180 mg, 69%; m.p: 56-58 °C;  $^1\text{H}$  NMR (400 MHz,  $\text{CDCl}_3$ )  $\delta$  8.34 (d,  $J$  = 8.3 Hz, 2H), 8.25 (d,  $J$  = 8.9 Hz, 2H), 7.42 – 7.35 (m, 4H), 2.49 (s, 3H);  $^{13}\text{C}$   $\{^1\text{H}\}$  (100 MHz,  $\text{CDCl}_3$ )  $\delta$  178.0, 170.7, 168.0, 151.8, 147.1, 131.7, 131.2, 129.9, 129.6, 124.7, 121.4, 120.4 (q,  $J$  = 257.0 Hz), 22.1; FT-IR (KBr)  $\nu$  ( $\text{cm}^{-1}$ ) 3156, 3088, 2926, 1661, 1604, 1555, 1474, 1421, 1312, 1266, 1216, 1025; HRMS (ESI) ( $m/z$ )  $[\text{M} + \text{H}]^+$  calcd. for  $\text{C}_{17}\text{H}_{12}\text{F}_3\text{N}_2\text{O}_3$ : 349.0800; found: 349.0807.

***m*-Tolyl(3-(3-(trifluoromethyl)phenyl)-1,2,4-oxadiazol-5-yl)methanone (3x):**

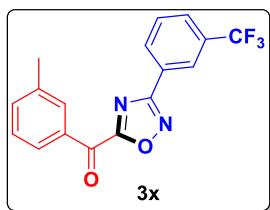

Purified by column chromatography eluting with petroleum ether/ethyl acetate = 9:1 (v/v); off-white solid; Yield: 159 mg, 64%;  $^1\text{H}$  NMR (400 MHz,  $\text{CDCl}_3$ )  $\delta$  8.46 (s, 1H), 8.39 (d,  $J$  = 7.8 Hz, 1H), 8.26 (d,  $J$  = 7.8 Hz, 1H), 8.17 (s, 1H), 7.82 (d,  $J$  = 7.8 Hz, 1H), 7.68 (t,  $J$  = 7.8 Hz, 1H), 7.56 (d,  $J$  = 7.5 Hz, 1H), 7.49 (t,  $J$  = 7.7 Hz, 1H), 2.48 (s, 3H);  $^{13}\text{C}$   $\{^1\text{H}\}$  (100 MHz,  $\text{CDCl}_3$ )  $\delta$  178.6, 170.8, 168.0, 139.2, 136.5, 134.1, 131.8 (q,  $J$  = 30.0 Hz), 131.1, 131.0, 129.8, 129.0, 128.5, 128.4, 127.0, 124.8 (q,  $J$  = 10.0 Hz), 123.7 (q,  $J$  = 270.0 Hz), 21.5; FT-IR (KBr)  $\nu$  ( $\text{cm}^{-1}$ ) 3163, 3065, 2931, 1677, 1603, 1559, 1418, 1325, 1300, 1270, 1072; HRMS (ESI) ( $m/z$ )  $[\text{M} + \text{H}]^+$  calcd. for  $\text{C}_{17}\text{H}_{12}\text{F}_3\text{N}_2\text{O}_2$ : 333.0851; found: 333.0856.

**(3,5-Dichlorophenyl)(3-(4-(trifluoromethyl)phenyl)-1,2,4-oxadiazol-5-yl)methanone (3y):**

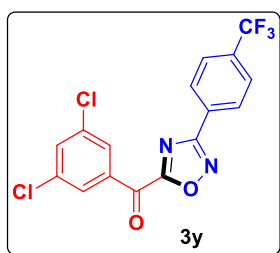



Purified by column chromatography eluting with petroleum ether/ethyl acetate = 19:1 (v/v); Off-white solid; Yield: 149 mg, 73%; m.p: 81-83 °C;  $^1\text{H}$  NMR (400 MHz,  $\text{CDCl}_3$ )  $\delta$  8.39 (d,  $J$  = 1.9 Hz, 2H), 8.32 (dd,  $J$  = 8.8, 0.9 Hz, 2H), 7.82 (d,  $J$  = 8.2 Hz, 2H), 7.72 (t,  $J$  = 1.9 Hz, 1H);  $^{13}\text{C}\{^1\text{H}\}$  NMR (100 MHz,  $\text{CDCl}_3$ )  $\delta$  175.6, 169.5, 168.3, 136.3, 136.1, 135.1, 133.9 (q,  $J$  = 33 Hz), 129.2, 129.1, 128.3, 126.3 (q,  $J$  = 4.0 Hz), 123.8 (q,  $J$  = 271 Hz); FT-IR (KBr)  $\nu$  ( $\text{cm}^{-1}$ ) 3083, 2962, 1681, 1567, 1536, 1417, 1320, 1190, 1168, 1127, 1104, 714, 670; HRMS (ESI) ( $m/z$ ) [ $\text{M} + \text{H}$ ] $^+$  calcd. for  $\text{C}_{16}\text{H}_8\text{Cl}_2\text{F}_3\text{N}_2\text{O}_2$ : 386.9915; found: 386.9906.

**(3-(4-Chlorophenyl)-1,2,4-oxadiazol-5-yl)(3-fluoro-4-methoxyphenyl)methanone (3z):**

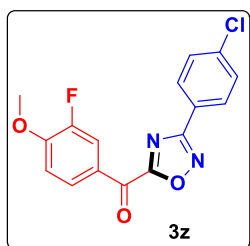

Purified by column chromatography eluting with petroleum ether/ethyl acetate = 9:1 (v/v); Pale green solid; Yield: 129 mg, 65%; m.p: 95-97 °C;  $^1\text{H}$  NMR (400 MHz,  $\text{CDCl}_3$ )  $\delta$  8.38 (ddd,  $J$  = 8.7, 2.2, 1.2 Hz, 1H), 8.26 (dd,  $J$  = 11.8, 2.2 Hz, 1H), 8.13 (d,  $J$  = 8.6 Hz, 2H), 7.52 (d,  $J$  = 8.6 Hz, 2H), 7.12 (t,  $J$  = 8.4 Hz, 1H), 4.03 (s, 3H);  $^{13}\text{C}\{^1\text{H}\}$  (100 MHz,  $\text{CDCl}_3$ )  $\delta$  175.7 (d,  $J$  = 2.4 Hz), 170.2, 168.2, 154.2 (d,  $J$  = 10.0 Hz), 152.1 (d,  $J$  = 248 Hz), 138.3, 129.6, 129.4 (d,  $J$  = 3.2 Hz), 129.1, 127.1 (d,  $J$  = 10.0 Hz), 124.6, 118.3 (d,  $J$  = 20.0 Hz), 112.8, 56.6; FT-IR (KBr)  $\nu$  ( $\text{cm}^{-1}$ ) 3118, 3080, 2982, 1665, 1606, 1580, 1516, 1440, 1314, 1286, 1134, 1091, 766, 658; HRMS (ESI) ( $m/z$ ) [ $\text{M} + \text{H}$ ] $^+$  calcd. for  $\text{C}_{16}\text{H}_{11}\text{ClFN}_2\text{O}_3$ : 333.0442; found: 333.0455.

**(3-(3,4-Dimethoxyphenyl)-1,2,4-oxadiazol-5-yl)(4-methoxyphenyl)methanone (3aa):**

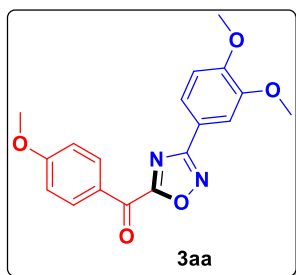

Purified by column chromatography eluting with petroleum ether/ethyl acetate = 1:1 (v/v); Pale yellow solid; Yield: 134 mg, 59%; m.p: 97-99 °C;  $^1\text{H}$  NMR (400 MHz,  $\text{CDCl}_3$ )  $\delta$  8.45 (d,  $J$  = 9.1 Hz, 2H), 7.80 (dd,  $J$  = 8.4, 1.9 Hz, 1H), 7.66 (d,  $J$  = 1.8 Hz, 1H), 7.04 (d,  $J$  = 9.0 Hz, 2H), 6.99 (d,  $J$  = 8.4 Hz, 1H), 3.99 (s, 3H), 3.96 (s, 3H), 3.94 (s, 3H);  $^{13}\text{C}\{^1\text{H}\}$  (100 MHz,  $\text{CDCl}_3$ )  $\delta$  177.0, 170.5, 168.6, 165.5, 152.1, 149.4, 133.6, 127.3, 121.5, 118.7, 114.4, 111.2, 110.1, 56.2,

56.1, 55.8; FT-IR (KBr)  $\nu$  ( $\text{cm}^{-1}$ ) 3156, 3120, 3076, 3008, 1651, 1603, 1571, 1511, 1439, 1303, 1265, 1240, 1171, 1025; HRMS (ESI) ( $m/z$ )  $[\text{M} + \text{H}]^+$  calcd. for  $\text{C}_{18}\text{H}_{17}\text{N}_2\text{O}_5$ : 341.1137; found: 341.1143.

**(3-(Benzo[*d*][1,3]dioxol-5-yl)-1,2,4-oxadiazol-5-yl)(2-chlorophenyl)methanone (3ab)**

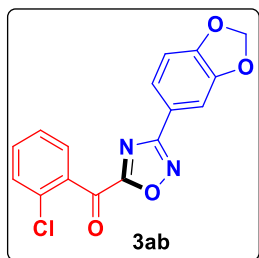

Purified by column chromatography eluting with petroleum ether/ethyl acetate = 8:2 (v/v); Pale green solid; Yield: 119 mg, 56%; m.p: 61-63 °C;  $^1\text{H}$  NMR (400 MHz,  $\text{CDCl}_3$ )  $\delta$  7.82 (dd,  $J = 7.7, 1.7$  Hz, 1H), 7.70 (dd,  $J = 8.1, 1.7$  Hz, 1H), 7.62 – 7.55 (m, 2H), 7.53 (dd,  $J = 8.1, 1.3$  Hz, 1H), 7.47 (td,  $J = 7.5, 1.3$  Hz, 1H), 6.91 (d,  $J = 8.1$  Hz, 1H), 6.05 (s, 2H);  $^{13}\text{C}\{^1\text{H}\}$  (100 MHz,  $\text{CDCl}_3$ )  $\delta$  179.8, 170.2, 169.0, 150.8, 148.4, 134.8, 134.2, 133.7, 131.5, 131.1, 127.2, 123.0, 119.7, 108.9, 107.8, 101.9; FT-IR (KBr)  $\nu$  ( $\text{cm}^{-1}$ ) 3126, 3096, 2961, 1697, 1683, 1588, 1564, 1463, 1256, 1114, 1041, 737, 667; HRMS (ESI) ( $m/z$ )  $[\text{M} + \text{H}]^+$  calcd. for  $\text{C}_{16}\text{H}_{10}\text{ClN}_2\text{O}_4$ : 329.0329; found: 329.0336.

**Methyl 3-(5-(2-fluorobenzoyl)-1,2,4-oxadiazol-3-yl)benzoate (3ac):**

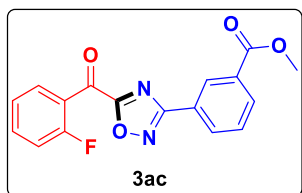

Purified by column chromatography eluting with petroleum ether/ethyl acetate = 9:1 (v/v); White solid; Yield: 146 mg, 62%; m.p: 88-89 °C;  $^1\text{H}$  NMR (400 MHz,  $\text{CDCl}_3$ )  $\delta$  8.81 (t,  $J = 1.8$  Hz, 1H), 8.35 (dt,  $J = 7.8, 1.5$  Hz, 1H), 8.23 (dt,  $J = 7.9, 1.5$  Hz, 1H), 8.09 – 8.00 (m, 1H), 7.77 – 7.68 (m, 1H), 7.61 (t,  $J = 7.8$  Hz, 1H), 7.38 (td,  $J = 7.6, 1.1$  Hz, 1H), 7.26 – 7.21 (m, 1H), 3.97 (s, 3H);  $^{13}\text{C}\{^1\text{H}\}$  (100 MHz,  $\text{CDCl}_3$ )  $\delta$  177.5, 170.9, 168.5, 166.3, 162.2 (d,  $J = 259$  Hz), 136.8 (d,  $J = 10$  Hz), 132.9, 132.0, 131.9, 131.4, 129.4, 129.0, 126.5, 124.8 (d,  $J = 10.0$  Hz), 123.8 (d,  $J = 10.0$  Hz), 117.2 (d,  $J = 20.0$  Hz), 52.6; FT-IR (KBr)  $\nu$  ( $\text{cm}^{-1}$ ) 3126, 3095, 3010, 2958, 1732, 1680, 1609, 1455, 1318, 1291, 1256, 1122, 1026; HRMS (ESI) ( $m/z$ )  $[\text{M} + \text{H}]^+$  calcd. for  $\text{C}_{17}\text{H}_{12}\text{FN}_2\text{O}_4$ : 327.0781; found: 327.0775.

***N*-(4-(5-benzoyl-1,2,4-oxadiazol-3-yl)phenyl)-2-(4-isobutylphenyl)propanamide (3ad):**

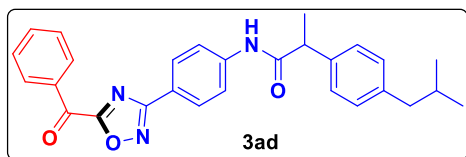

Purified by column chromatography eluting with petroleum ether/ethyl acetate = 8:2 (v/v); White solid; Yield: 105 mg, 28%; m.p: 160-161 °C;  $^1\text{H}$  NMR (400 MHz,  $\text{CDCl}_3$ )  $\delta$  8.43 (d,  $J$  = 8.9 Hz, 2H), 8.17 (dd,  $J$  = 7.9, 1.7 Hz, 2H), 7.65 (d,  $J$  = 8.9 Hz, 2H), 7.57 – 7.50 (m, 3H), 7.38 (s, 1H), 7.27 (d,  $J$  = 6.4 Hz, 2H), 7.18 (d,  $J$  = 8.1 Hz, 2H), 3.75 (q,  $J$  = 7.1 Hz, 1H), 2.48 (d,  $J$  = 7.2 Hz, 2H), 1.92 – 1.85 (m, 1H), 1.61 (d,  $J$  = 7.1 Hz, 3H), 0.91 (d,  $J$  = 6.6 Hz, 6H);  $^{13}\text{C}\{^1\text{H}\}$  (100 MHz,  $\text{CDCl}_3$ )  $\delta$  176.9, 173.1, 170.4, 169.0, 144.4, 141.7, 137.5, 132.8, 131.9, 130.3, 129.6, 129.2, 127.8, 127.6, 126.1, 118.9, 48.2, 45.1, 30.3, 22.5, 18.6; FT-IR (KBr)  $\nu$  ( $\text{cm}^{-1}$ ) 3396, 3162, 3085, 2958, 1696, 1655, 1602, 1558, 1512, 1459, 1303, 1250, 1172, 1013; HRMS (ESI) ( $m/z$ ) [ $M + H$ ] $^+$  calcd. for  $\text{C}_{28}\text{H}_{28}\text{N}_3\text{O}_3$ : 454.2131; found: 454.2134.

**(3-Cyclopentyl-1,2,4-oxadiazol-5-yl)(3,5-dichlorophenyl)methanone (3ae):**

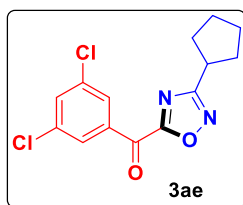

Purified by column chromatography eluting with petroleum ether/ethyl acetate = 9:1 (v/v); Off-white solid; Yield: 53 mg, 32%; m.p: 72-73 °C;  $^1\text{H}$  NMR (400 MHz,  $\text{CDCl}_3$ )  $\delta$  8.33 (d,  $J$  = 2.0 Hz, 2H), 7.69 (t,  $J$  = 1.9 Hz, 1H), 3.40 (quint,  $J$  = 8.0 Hz, 1H), 2.20 – 2.12 (m, 2H), 1.97 – 1.85 (m, 4H), 1.79 – 1.71 (m, 2H);  $^{13}\text{C}\{^1\text{H}\}$  (100 MHz,  $\text{CDCl}_3$ )  $\delta$  176.1, 175.2, 168.9, 136.4, 136.1, 134.8, 129.2, 36.8, 31.8, 25.7; FT-IR (KBr)  $\nu$  ( $\text{cm}^{-1}$ ) 3123, 3115, 3091, 1811, 1684, 1567, 1503, 1421, 1397, 1193, 1038, 749, 666; HRMS (ESI) ( $m/z$ ) [ $M + H$ ] $^+$  calcd. for  $\text{C}_{14}\text{H}_{13}\text{Cl}_2\text{N}_2\text{O}_2$ : 311.0354; found: 311.0352.

**(3-Cyclohexyl-1,2,4-oxadiazol-5-yl)(3,5-dichlorophenyl)methanone (3af):**

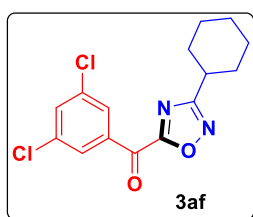

Purified by column chromatography eluting with petroleum ether/ethyl acetate = 9:1 (v/v); Off-white solid; Yield: 60 mg, 35%; m.p: 90-91 °C;  $^1\text{H}$  NMR (400 MHz,  $\text{CDCl}_3$ )  $\delta$  8.33 (d,  $J$  = 1.9 Hz, 2H), 7.69 (t,  $J$  = 1.9 Hz, 1H), 2.98 (tt,  $J$  = 11.4, 3.6 Hz, 1H), 2.14 – 2.08 (m, 2H), 1.88 (dt,

$J = 13.4, 3.8$  Hz, 2H), 1.79 – 1.73 (m, 1H), 1.71 – 1.60 (m, 2H), 1.50 – 1.40 (m, 2H), 1.39 – 1.30 (m, 1H);  $^{13}\text{C}\{^1\text{H}\}$  (100 MHz,  $\text{CDCl}_3$ )  $\delta$  176.0, 175.2, 168.8, 136.4, 136.1, 134.8, 129.2, 36.1, 30.7, 25.7 (2C); FT-IR (KBr)  $\nu$  ( $\text{cm}^{-1}$ ) 3135, 3115, 3063, 3088, 1800, 1681, 1566, 1500, 1454, 1303, 1265, 1119, 1038, 764, 668; HRMS (ESI) ( $m/z$ )  $[\text{M} + \text{H}]^+$  calcd. for  $\text{C}_{15}\text{H}_{15}\text{Cl}_2\text{N}_2\text{O}_2$ : 325.0511; found: 325.0501.

**(4-Chlorophenyl)(3-(tetrahydro-2H-pyran-4-yl)-1,2,4-oxadiazol-5-yl)methanone (3ag):**

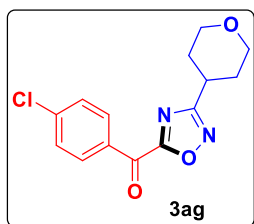

Purified by column chromatography eluting with petroleum ether/ethyl acetate = 1:9 (v/v); green solid; Yield: 72 mg, 38%; m.p: 60-62 °C;  $^1\text{H}$  NMR (400 MHz,  $\text{CDCl}_3$ )  $\delta$  8.39 (d,  $J = 8.7$  Hz, 2H), 7.55 (d,  $J = 8.7$  Hz, 2H), 4.10 (t,  $J = 3.5$  Hz, 1H), 4.07 (t,  $J = 3.5$  Hz, 1H), 3.64 – 3.54 (m, 2H), 3.29 – 3.18 (m, 1H), 2.08 – 2.00 (m, 4H);  $^{13}\text{C}\{^1\text{H}\}$  (100 MHz,  $\text{CDCl}_3$ )  $\delta$  177.1, 173.6, 169.7, 142.3, 132.4, 132.3, 129.5, 67.2, 33.4, 30.2; FT-IR (KBr)  $\nu$  ( $\text{cm}^{-1}$ ) 3162, 3126, 3050, 2991, 1682, 1587, 1562, 1402, 1308, 1243, 1024, 741, 642; HRMS (ESI) ( $m/z$ )  $[\text{M} + \text{H}]^+$  calcd. for  $\text{C}_{14}\text{H}_{14}\text{ClN}_2\text{O}_3$ : 293.0693; found: 293.0700.

**(3,5-Dichlorophenyl)(3-(4-methoxybenzyl)-1,2,4-oxadiazol-5-yl)methanone (3ah):**

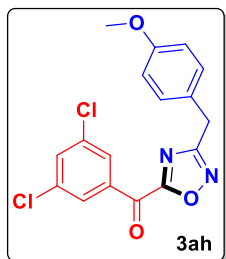

Purified by column chromatography eluting with petroleum ether/ethyl acetate = 9:1 (v/v); Pale yellow solid; Yield: 95 mg, 49%; m.p: 57-59 °C;  $^1\text{H}$  NMR (400 MHz,  $\text{CDCl}_3$ )  $\delta$  8.29 (d,  $J = 1.9$  Hz, 2H), 7.67 (t,  $J = 1.9$  Hz, 1H), 7.30 (d,  $J = 8.7$  Hz, 2H), 6.89 (d,  $J = 8.7$  Hz, 2H), 4.18 (s, 2H), 3.79 (s, 3H);  $^{13}\text{C}\{^1\text{H}\}$  (100 MHz,  $\text{CDCl}_3$ )  $\delta$  175.8, 170.8, 169.1, 159.1, 136.2, 136.1, 134.9, 130.2, 129.2, 126.7, 114.4, 55.4, 31.7; FT-IR (KBr)  $\nu$  ( $\text{cm}^{-1}$ ) 3123, 3087, 2969, 1681, 1612, 1566, 1513, 1404, 1304, 1249, 1036, 779, 673; HRMS (ESI) ( $m/z$ )  $[\text{M} + \text{H}]^+$  calcd. for  $\text{C}_{17}\text{H}_{13}\text{Cl}_2\text{N}_2\text{O}_3$ : 363.0303; found: 363.0295

**(3-Fluoro-4-methylphenyl)(3-(4-(trifluoromethyl)benzyl)-1,2,4-oxadiazol-5-yl)methanone (3ai):**

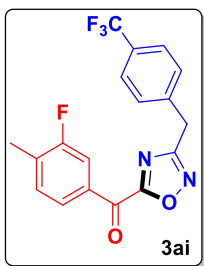

Purified by column chromatography eluting with petroleum ether/ethyl acetate = 9:1 (v/v); Pale yellow solid; Yield: 108 mg, 45%; m.p: 81-83 °C;  $^1\text{H}$  NMR (400 MHz,  $\text{CDCl}_3$ )  $\delta$  8.08 (dd,  $J$  = 7.9, 1.8 Hz, 1H), 8.03 (dd,  $J$  = 10.1, 1.8 Hz, 1H), 7.62 (d,  $J$  = 8.1 Hz, 2H), 7.51 (d,  $J$  = 8.1 Hz, 2H), 7.37 (t,  $J$  = 7.7 Hz, 1H), 4.30 (s, 2H), 2.39 (d,  $J$  = 2.0 Hz, 3H);  $^{13}\text{C}\{^1\text{H}\}$  (100 MHz,  $\text{CDCl}_3$ )  $\delta$  176.7 (d,  $J$  = 1.8 Hz), 170.2, 169.6, 161.3 (d,  $J$  = 246 Hz), 138.9, 134.1 (d,  $J$  = 20.0 Hz), 133.5 (d,  $J$  = 7.6 Hz), 132.1 (d,  $J$  = 10.0 Hz), 130.0 (q,  $J$  = 30.0 Hz), 129.6, 126.7 (d,  $J$  = 10.0 Hz), 126.0 (q,  $J$  = 10.0 Hz), 124.2 (q,  $J$  = 270.0 Hz), 117.1 (d,  $J$  = 30.0 Hz), 32.4, 15.3 (d,  $J$  = 3.5 Hz); FT-IR (KBr)  $\nu$  ( $\text{cm}^{-1}$ ) 3106, 3086, 2999, 1679, 1618, 1574, 1504, 1421, 1327, 1243, 1118, 1020; HRMS (ESI) ( $m/z$ )  $[\text{M} + \text{H}]^+$  calcd. for  $\text{C}_{18}\text{H}_{13}\text{F}_4\text{N}_2\text{O}_2$ : 365.0913; found: 365.0915.

**(3-Fluoro-4-methoxyphenyl)(3-(3-fluorobenzyl)-1,2,4-oxadiazol-5-yl)methanone (3aj):**

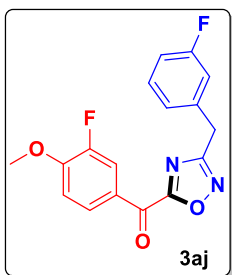

Purified by column chromatography eluting with petroleum ether/ethyl acetate = 9:1 (v/v); Grey solid; Yield: 89 mg, 45%; m.p: 73-75 °C;  $^1\text{H}$  NMR (400 MHz,  $\text{CDCl}_3$ )  $\delta$  8.27 (ddd,  $J$  = 8.7, 2.2, 1.2 Hz, 1H), 8.15 (dd,  $J$  = 11.8, 2.2 Hz, 1H), 7.32 (td,  $J$  = 8.0, 5.9 Hz, 1H), 7.15 (dd,  $J$  = 7.7, 0.7 Hz, 1H), 7.13 – 7.03 (m, 2H), 6.98 (tdd,  $J$  = 8.5, 2.6, 1.0 Hz, 1H), 4.23 (s, 2H), 4.00 (s, 3H);  $^{13}\text{C}\{^1\text{H}\}$  (100 MHz,  $\text{CDCl}_3$ )  $\delta$  175.7 (d,  $J$  = 2.0 Hz), 170.2, 169.7, 163.0 (d,  $J$  = 245 Hz), 154.1 (d,  $J$  = 10.0 Hz), 152.1 (d,  $J$  = 250 Hz), 137.2 (d,  $J$  = 10.0 Hz), 130.4 (d,  $J$  = 10.0 Hz), 129.3 (d,  $J$  = 3.3 Hz), 127.0 (d,  $J$  = 10.0 Hz), 124.8 (d,  $J$  = 3.0 Hz), 118.2 (d,  $J$  = 20.0 Hz), 116.2 (d,  $J$  = 20.0 Hz), 114.6 (d,  $J$  = 20.0 Hz), 112.7, 56.6, 32.2; FT-IR (KBr)  $\nu$  ( $\text{cm}^{-1}$ ) 3156, 3070, 2984, 1666, 1614, 1520, 1492, 1446, 1325, 1290, 1227, 1144, 1019; HRMS (ESI) ( $m/z$ )  $[\text{M} + \text{H}]^+$  calcd. for  $\text{C}_{17}\text{H}_{13}\text{F}_2\text{N}_2\text{O}_3$ : 331.0894; found: 331.0899.

**Phenyl(3-phenyl-1,2,4-oxadiazol-5-yl)methanol (4):**

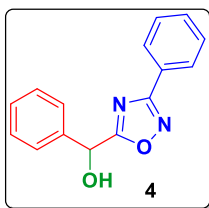

Purified by column chromatography eluting with petroleum ether/ethyl acetate = 8:2 (v/v); Pale pink solid; Yield: 44 mg, 87%; m.p: 102-103 °C;  $^1\text{H NMR}$  (400 MHz,  $\text{CDCl}_3$ )  $\delta$  8.06 (dd,  $J = 8.1, 1.7$  Hz, 2H), 7.53 – 7.44 (m, 5H), 7.42 – 7.34 (m, 3H), 6.07 (s, 1H), 3.67 (s, 1H);  $^{13}\text{C}\{^1\text{H}\}$  (100 MHz,  $\text{CDCl}_3$ )  $\delta$  179.6, 168.3, 137.9, 131.6, 129.4, 129.2, 129.0, 127.7, 126.8, 126.4, 69.7; FT-IR (KBr)  $\nu$  ( $\text{cm}^{-1}$ ) 3267, 3063, 3032, 2912, 1595, 1568, 1478, 1361, 1213, 1099, 1023; HRMS (ESI) (m/z)  $[\text{M} + \text{H}]^+$  calcd. for  $\text{C}_{15}\text{H}_{13}\text{N}_2\text{O}_2$ : 253.0977; found: 253.0973.

#### 4-Methoxy-*N*-(phenyl(3-phenyl-1,2,4-oxadiazol-5-yl)methyl)aniline (5):

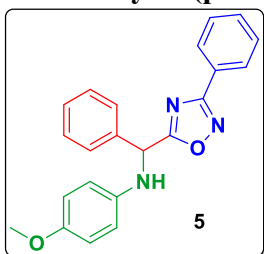

Purified by column chromatography eluting with petroleum ether/ethyl acetate = 8:2 (v/v); Pale yellow solid; Yield: 122 mg, 86%; m.p: 113-114 °C;  $^1\text{H NMR}$  (400 MHz,  $\text{CDCl}_3$ )  $\delta$  8.07 (dd,  $J = 7.9, 1.7$  Hz, 2H), 7.57 – 7.52 (m, 2H), 7.50 – 7.43 (m, 3H), 7.42 – 7.31 (m, 3H), 6.75 (d,  $J = 9.0$  Hz, 2H), 6.66 (d,  $J = 9.0$  Hz, 2H), 5.85 (d,  $J = 4.4$  Hz, 1H), 4.62 (s, 1H), 3.71 (s, 3H);  $^{13}\text{C}\{^1\text{H}\}$  (100 MHz,  $\text{CDCl}_3$ )  $\delta$  179.5, 168.5, 153.3, 139.9, 137.4, 131.5, 129.3, 129.0 (2C), 127.7, 127.4, 126.6, 115.5, 115.0, 56.9, 55.8; FT-IR (KBr)  $\nu$  ( $\text{cm}^{-1}$ ) 3383, 3123, 3074, 2993, 1595, 1573, 1515, 1447, 1356, 1242, 1185, 1028; HRMS (ESI) (m/z)  $[\text{M} + \text{H}]^+$  calcd. for  $\text{C}_{22}\text{H}_{20}\text{N}_3\text{O}_2$ : 358.1556; found: 358.1545.

#### References:

1. M. Arockiaraj and V. Rajeshkumar, *Adv. Synth. Catal.*, **2024**, 366, 2557–2564.
2. (a) M. A. Khanfar, D. Reiner, S. Hagenow and H. Stark, *Bioorg. Med. Chem.*, **2018**, 26, 4034–4046; (b) L. G. Maciel, A. D. S. Barbosa, E. B. de Alencar-Filho, T. A. Soares and J. V. D. Anjos, *RSC Med. Chem.*, **2021**, 12, 222–236.
3. A. F. Abdel-Magid, K. G. Carson, B. D. Harris, C. A. Maryanoff and R. D. Shah, *J. Org. Chem.*, **1996**, 61, 3849–3862.

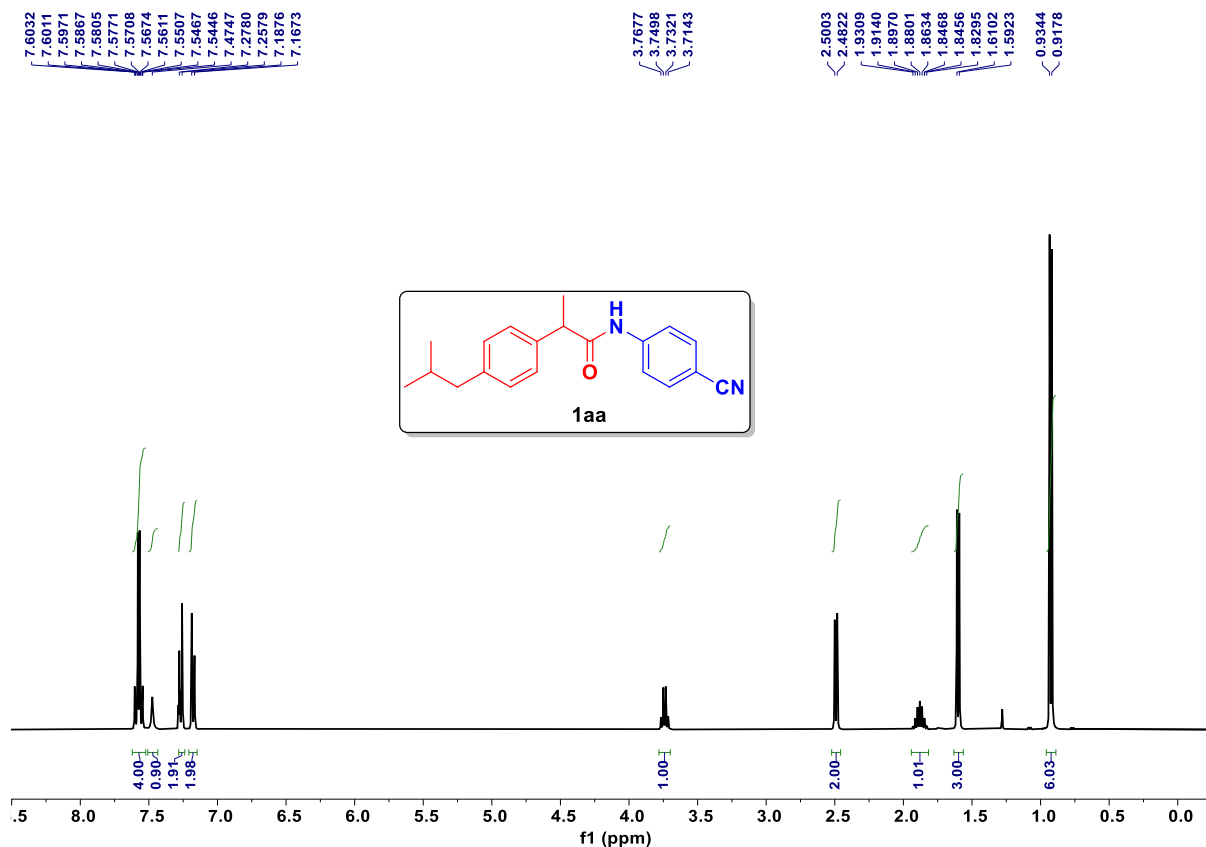

Figure 1.  $^1\text{H}$  NMR (400 MHz,  $\text{CDCl}_3$ ) of compound **1aa**

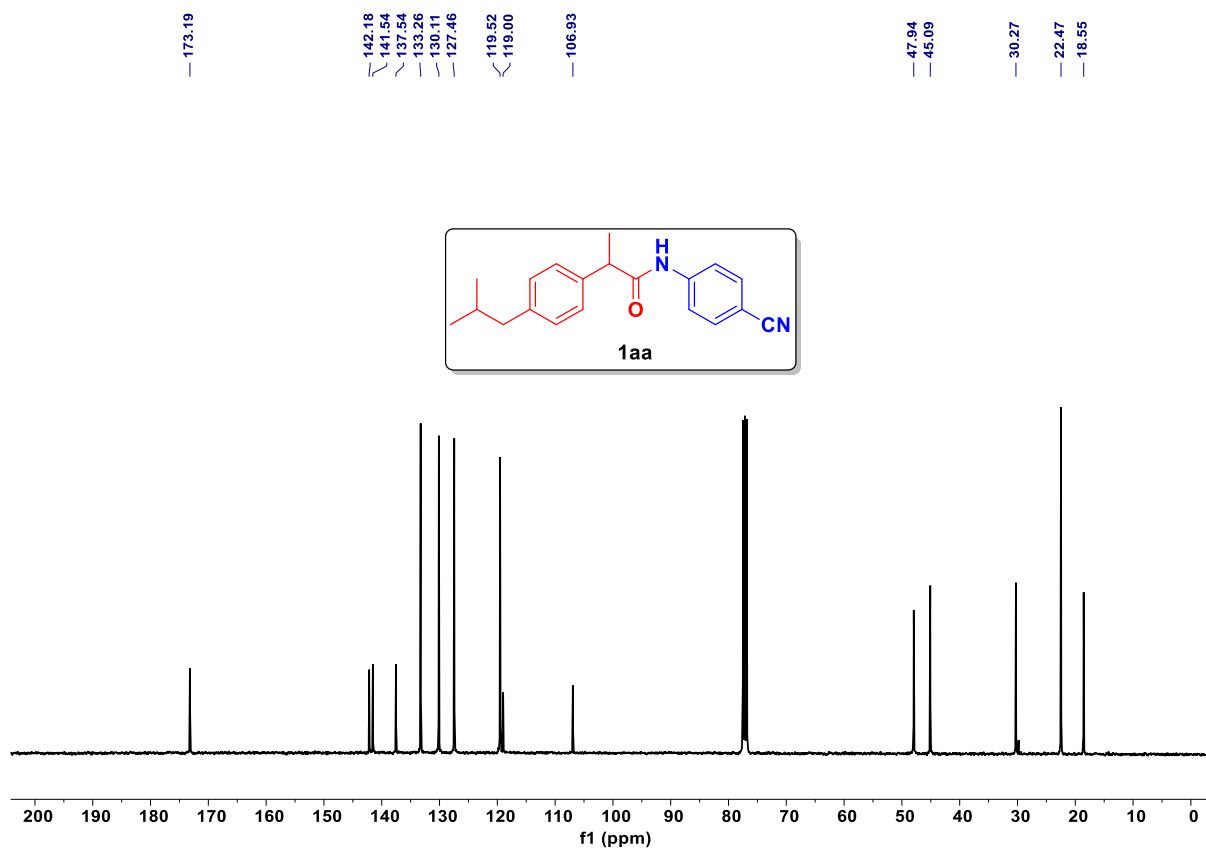

Figure 2.  $^{13}\text{C}\{^1\text{H}\}$  (100 MHz,  $\text{CDCl}_3$ ) of compound **1aa**

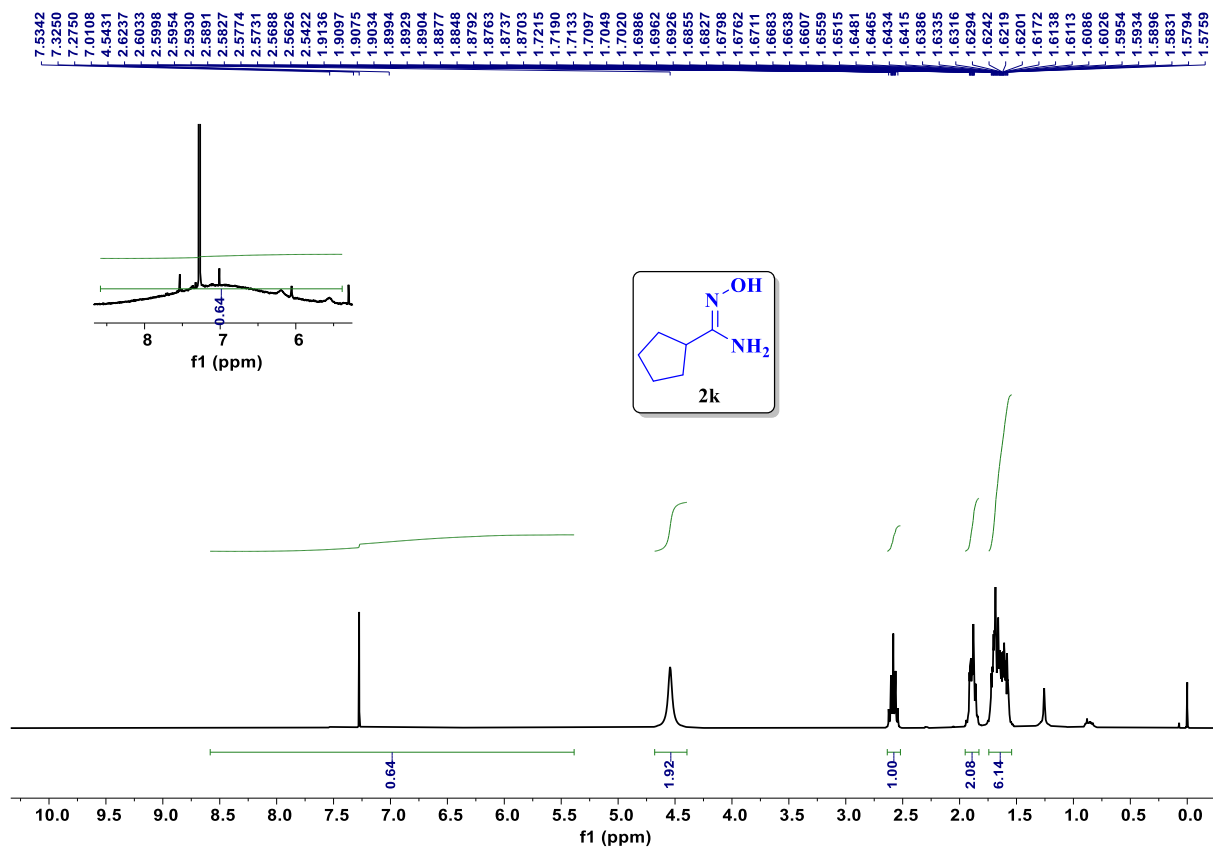

Figure 3.  $^1\text{H}$  NMR (400 MHz,  $\text{CDCl}_3$ ) of compound 2k

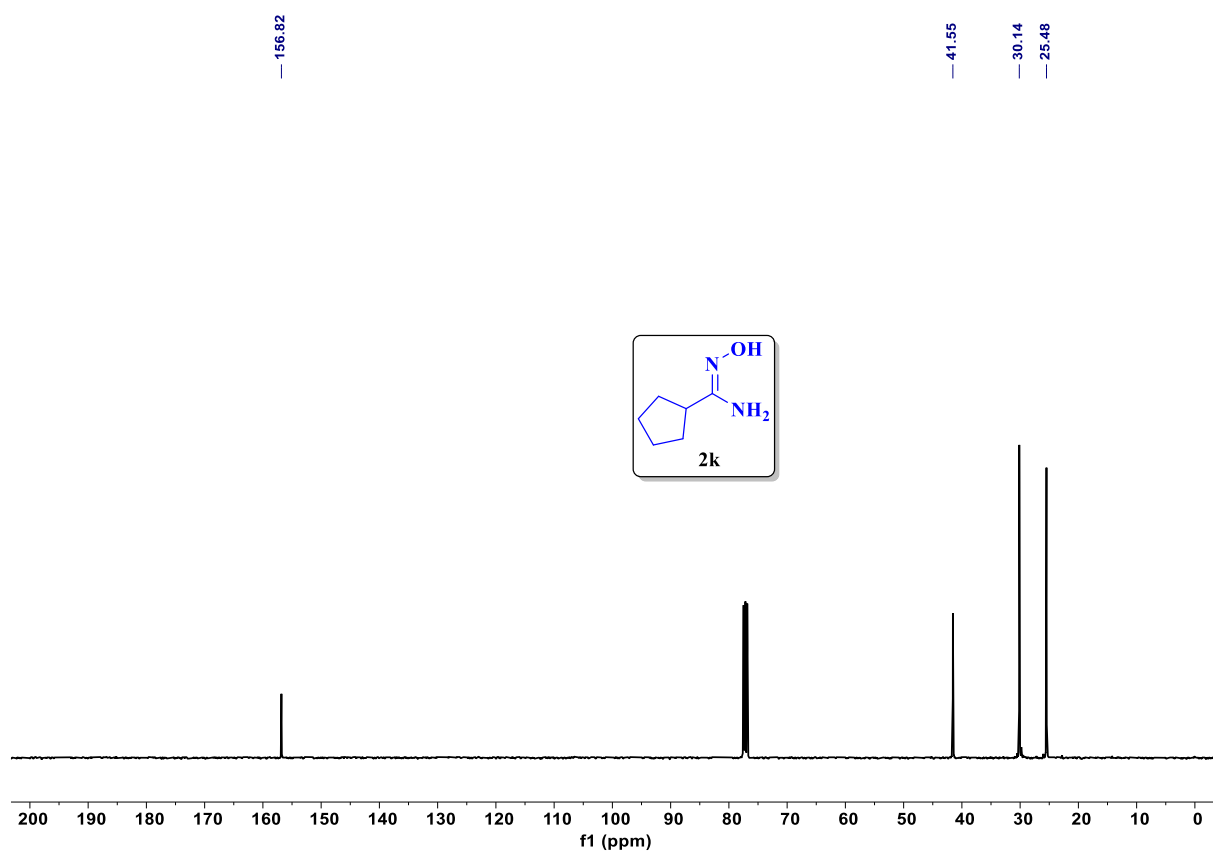

Figure 4.  $^{13}\text{C}\{^1\text{H}\}$  NMR (100 MHz,  $\text{CDCl}_3$ ) of compound 2k



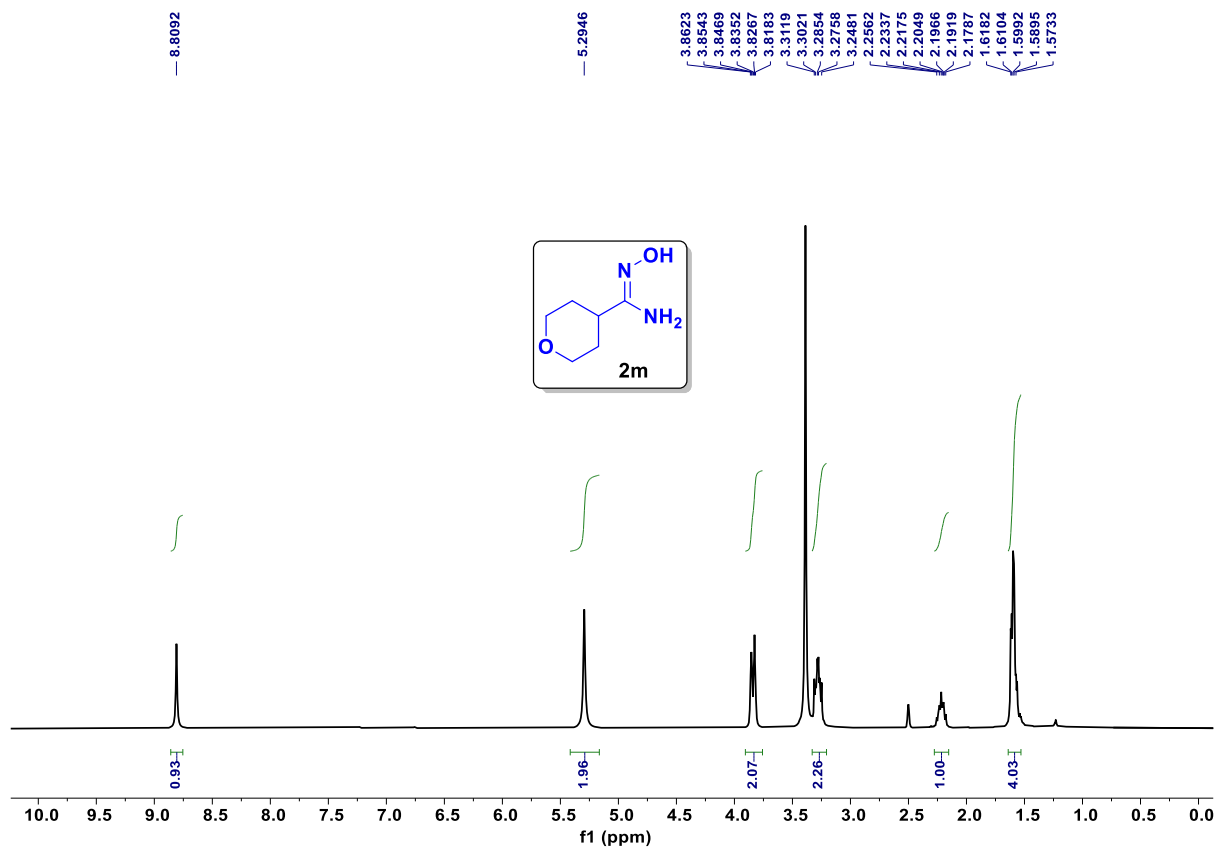

Figure 5. <sup>1</sup>H NMR (400 MHz, DMSO-*d*<sub>6</sub>) of compound **2m**

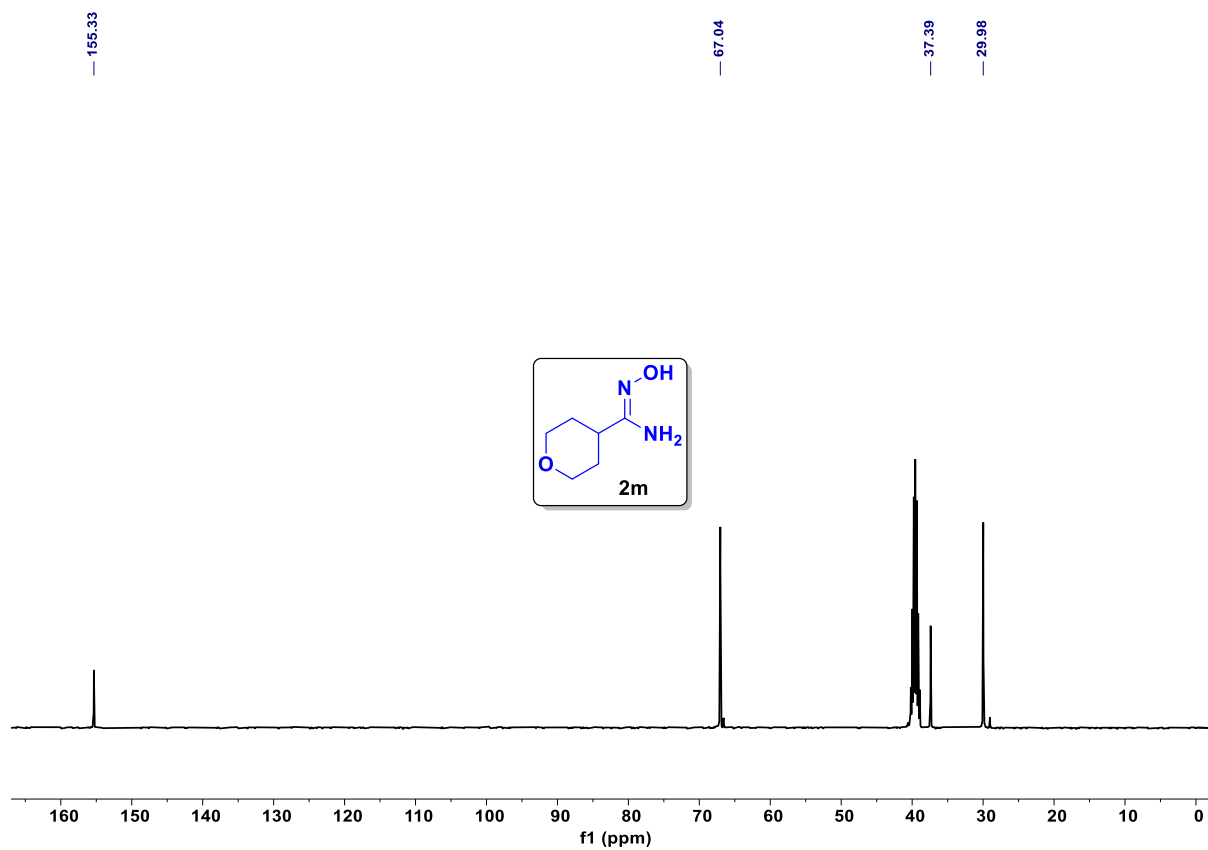

Figure 6. <sup>13</sup>C {<sup>1</sup>H} NMR (100 MHz, DMSO-*d*<sub>6</sub>) of compound **2m**

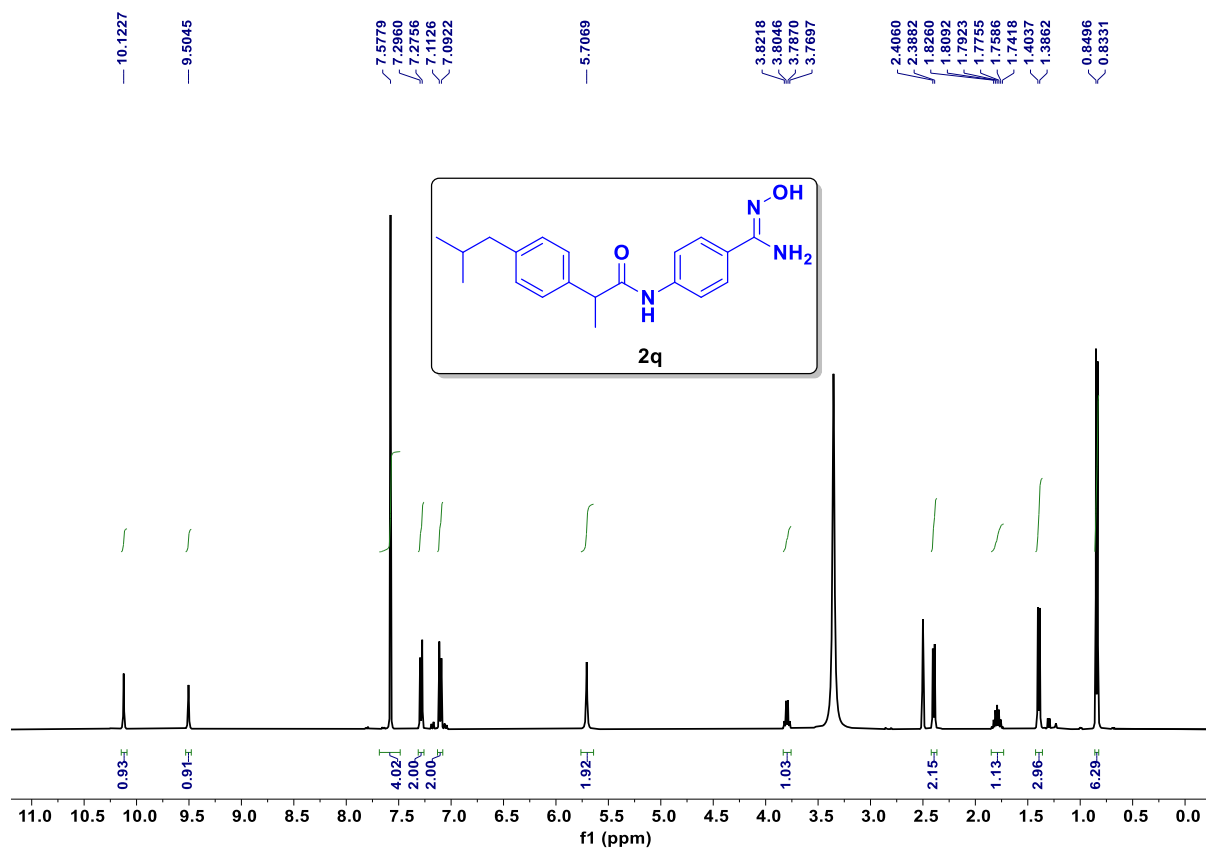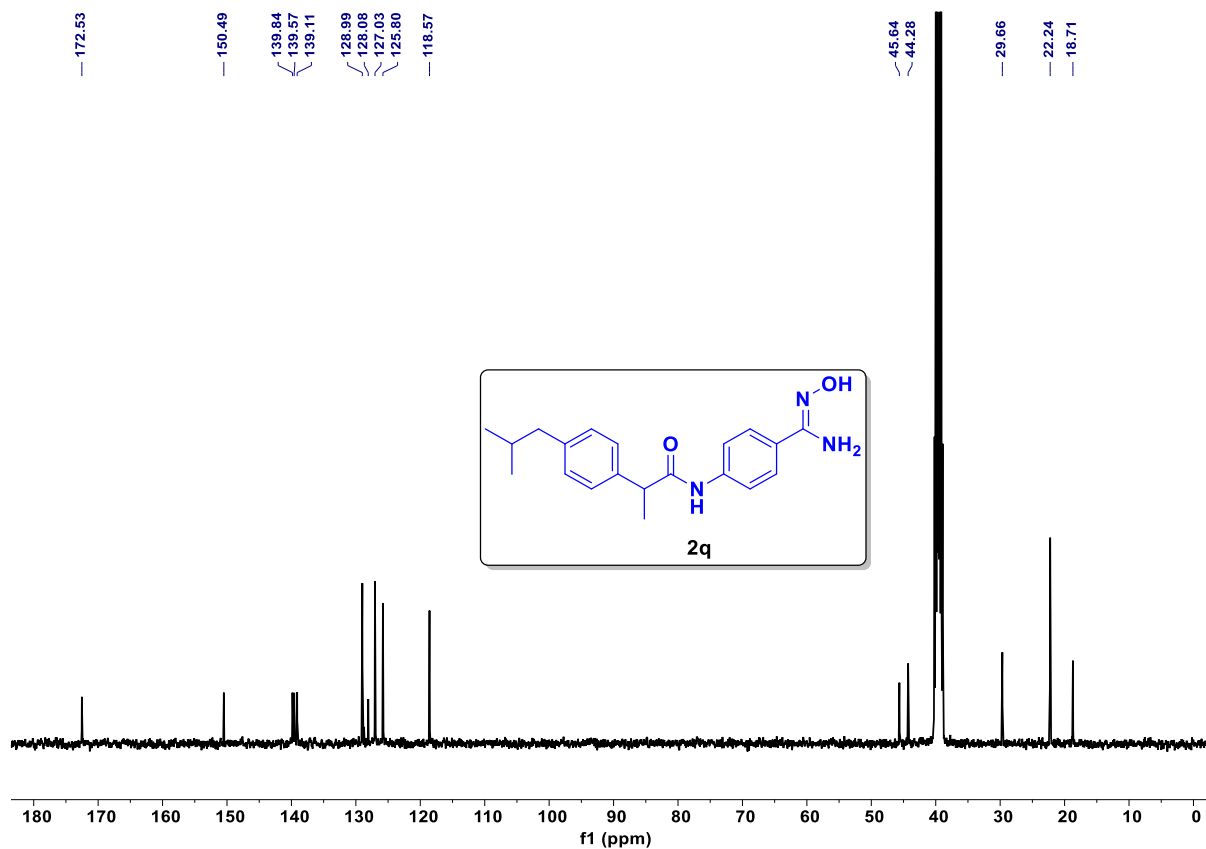

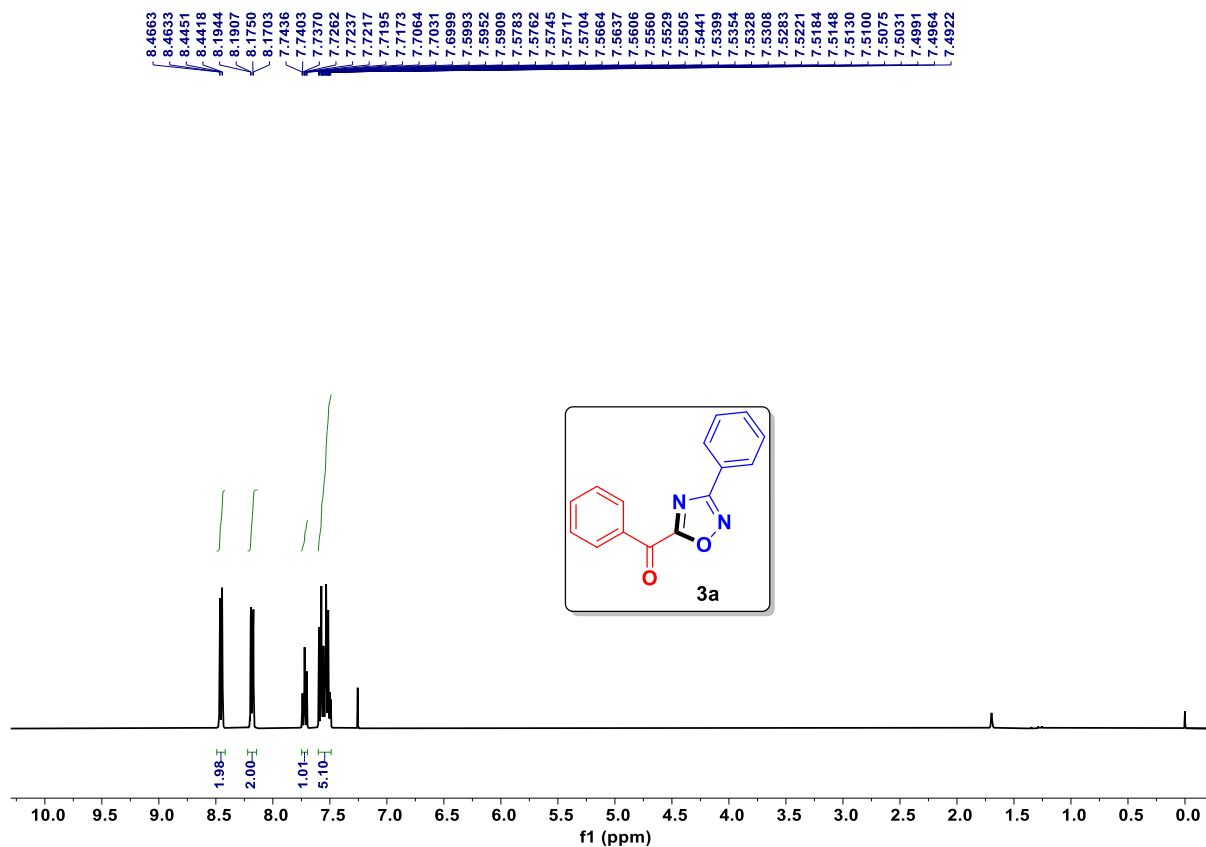

Figure 9.  $^1\text{H}$  NMR (400 MHz,  $\text{CDCl}_3$ ) of compound **3a**

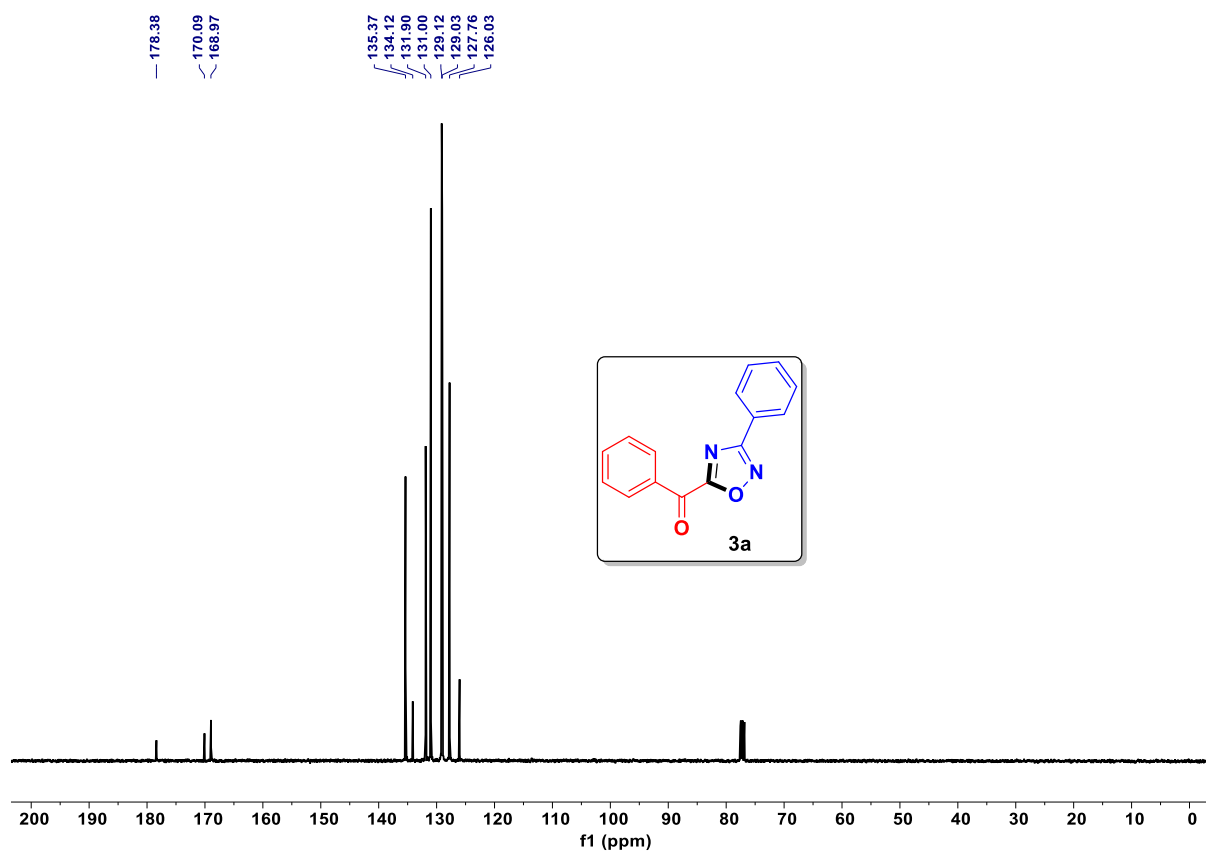

Figure 10.  $^{13}\text{C}\{^1\text{H}\}$  NMR (100 MHz,  $\text{CDCl}_3$ ) of compound **3a**

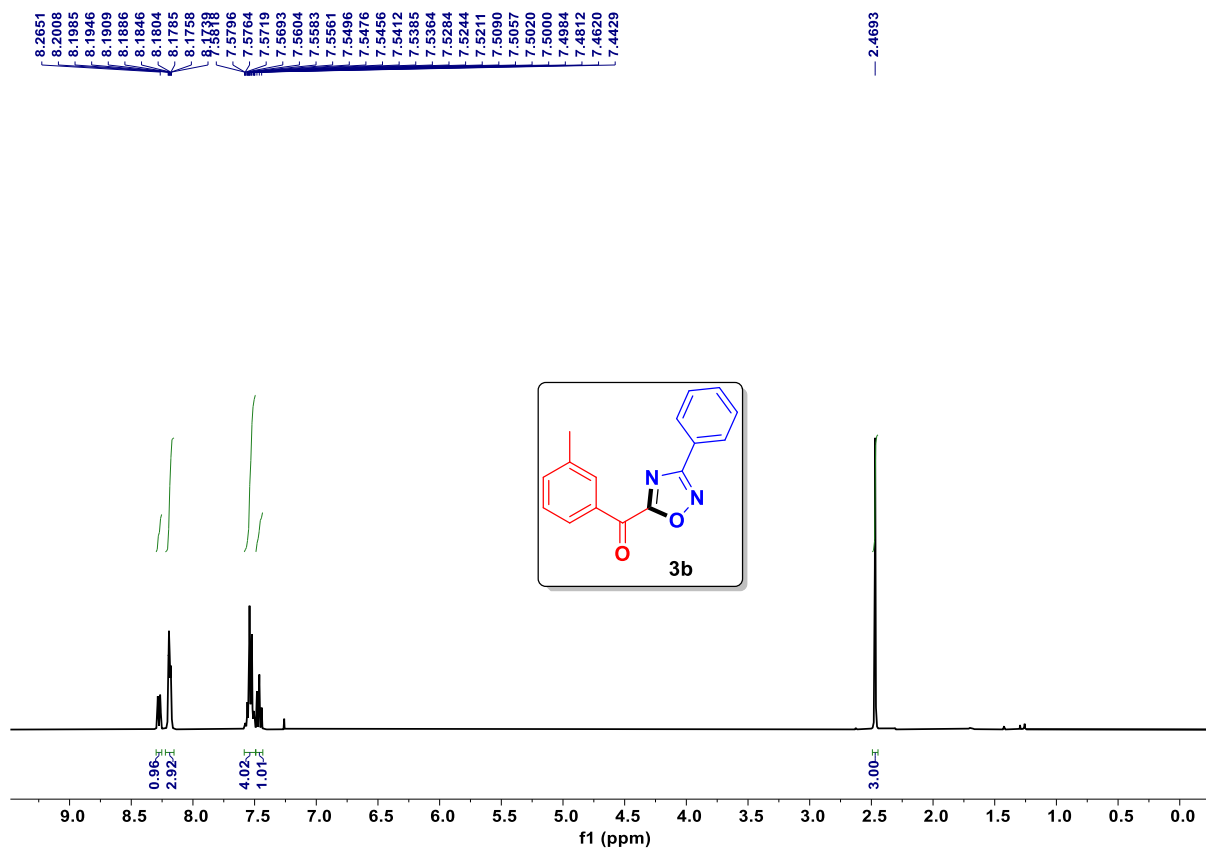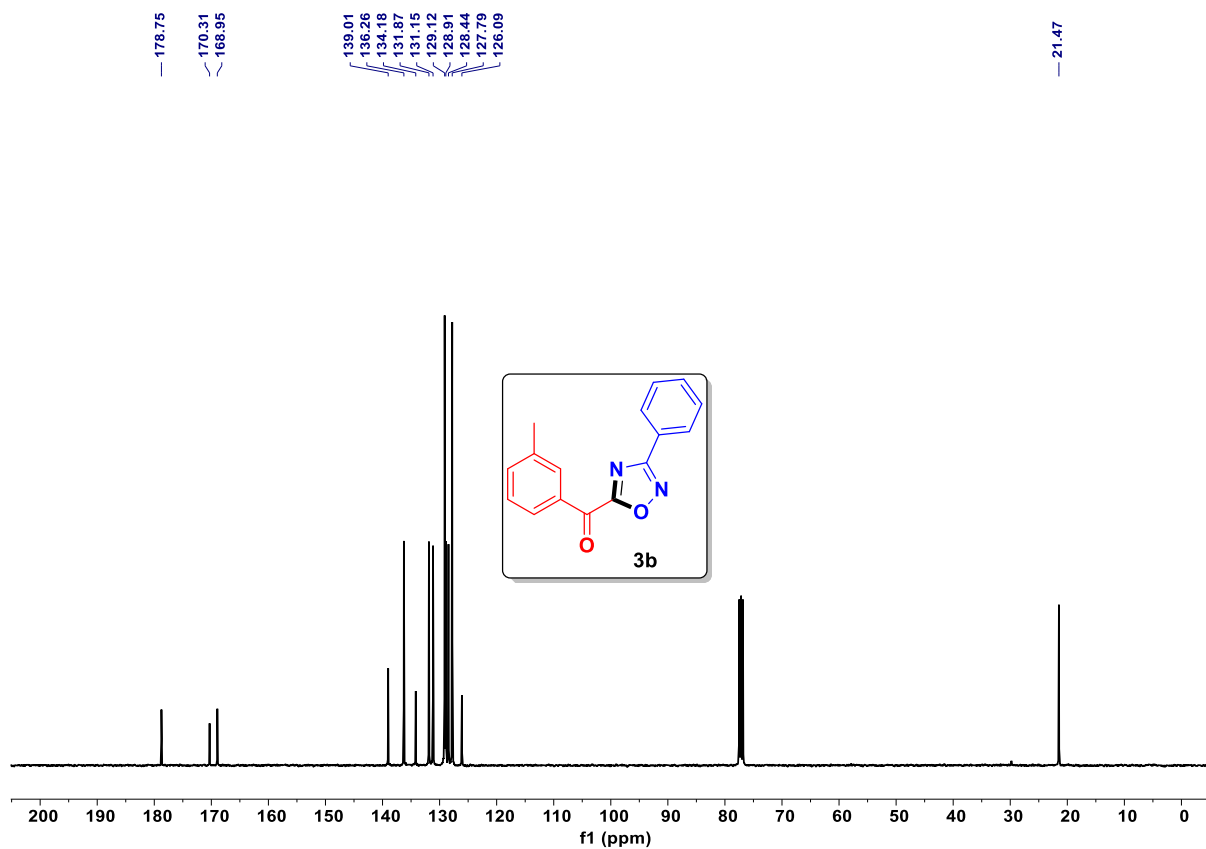

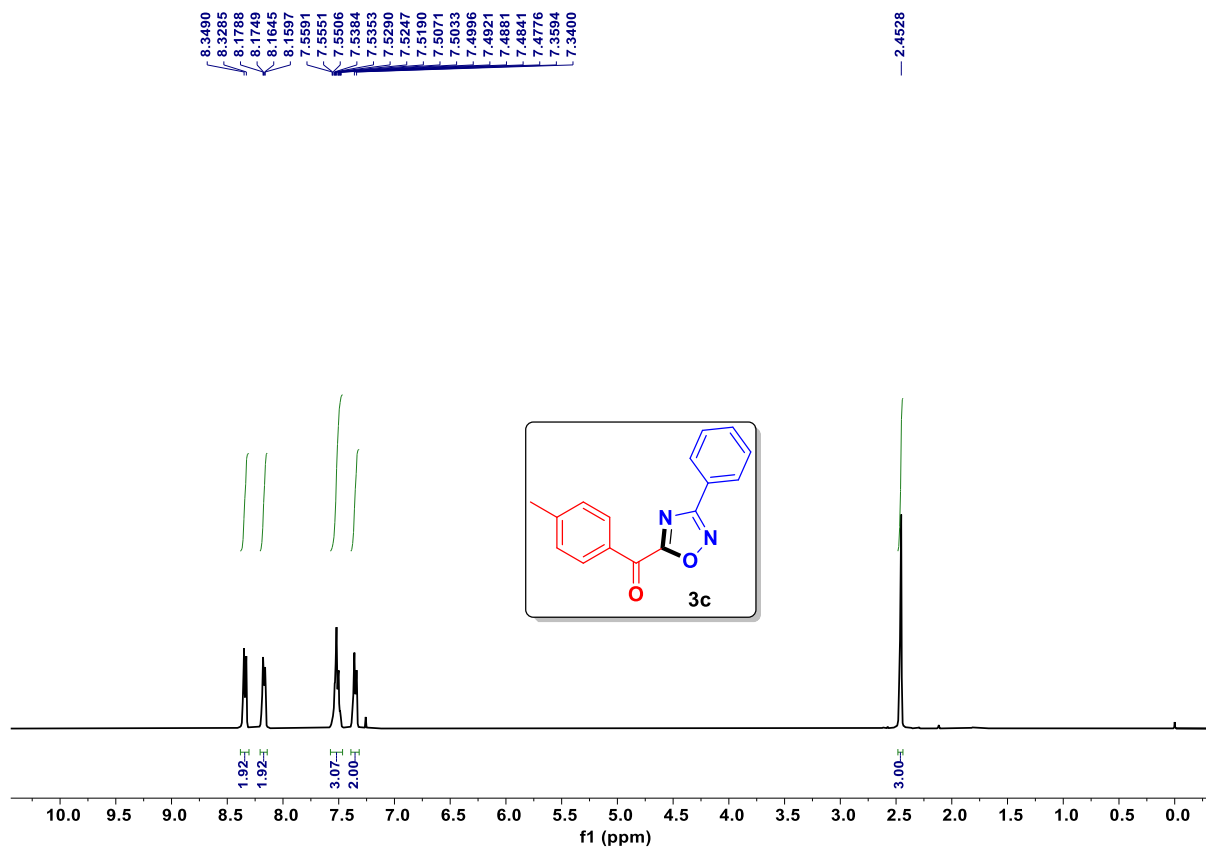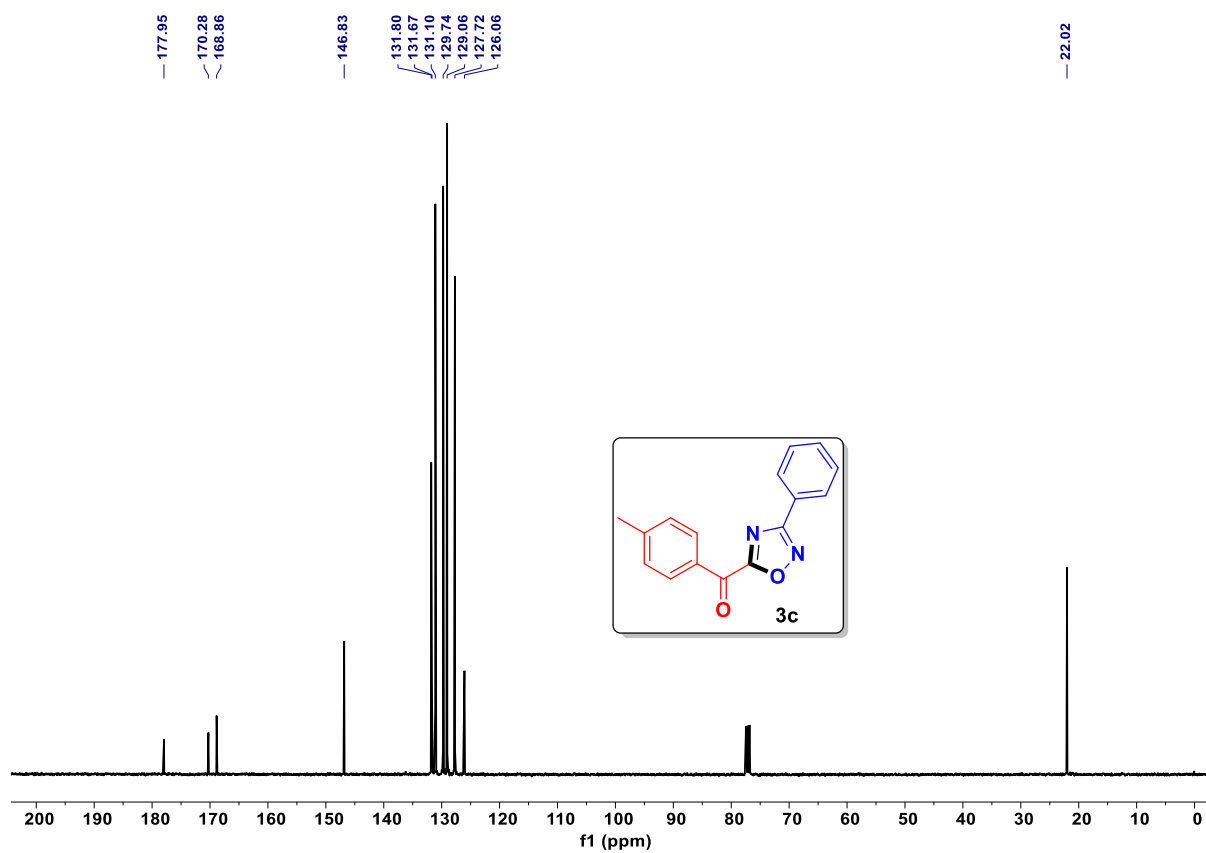

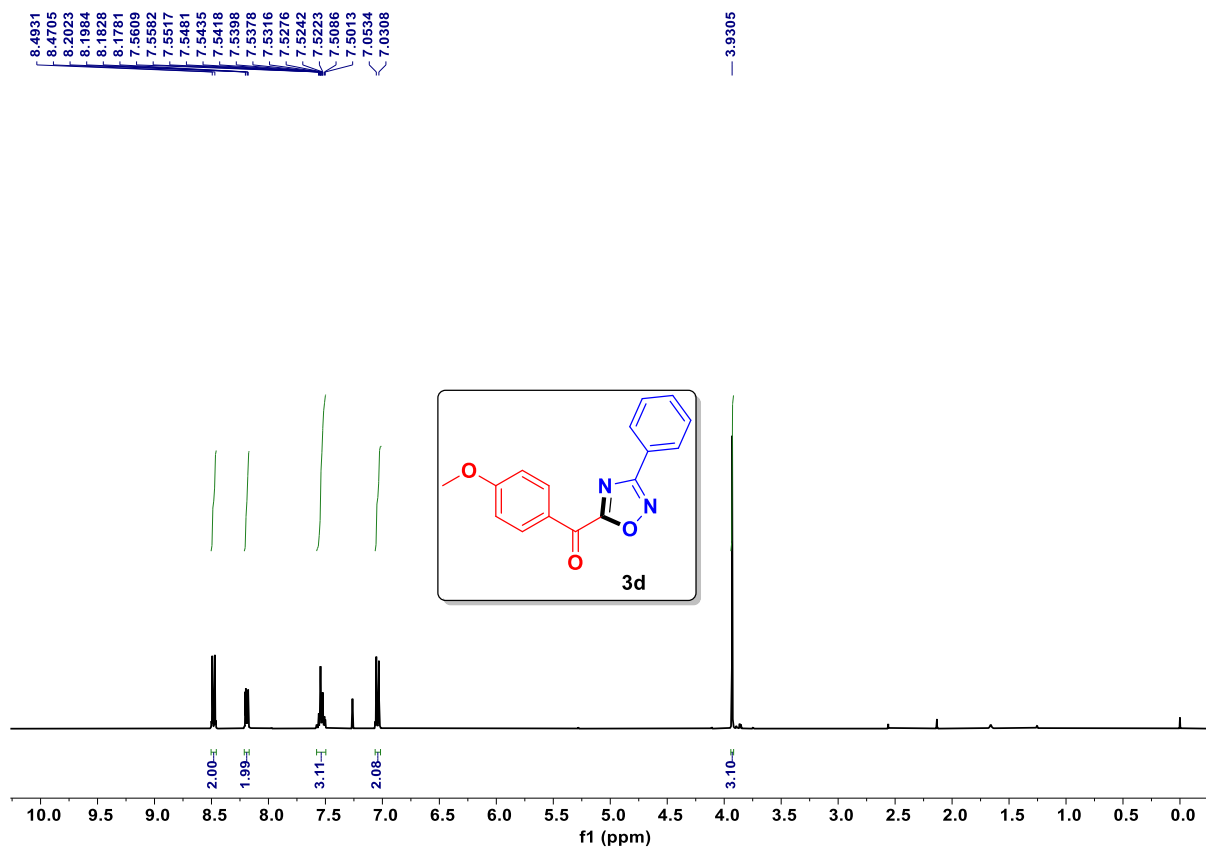

Figure 15.  $^1\text{H}$  NMR (400 MHz,  $\text{CDCl}_3$ ) of compound 3d

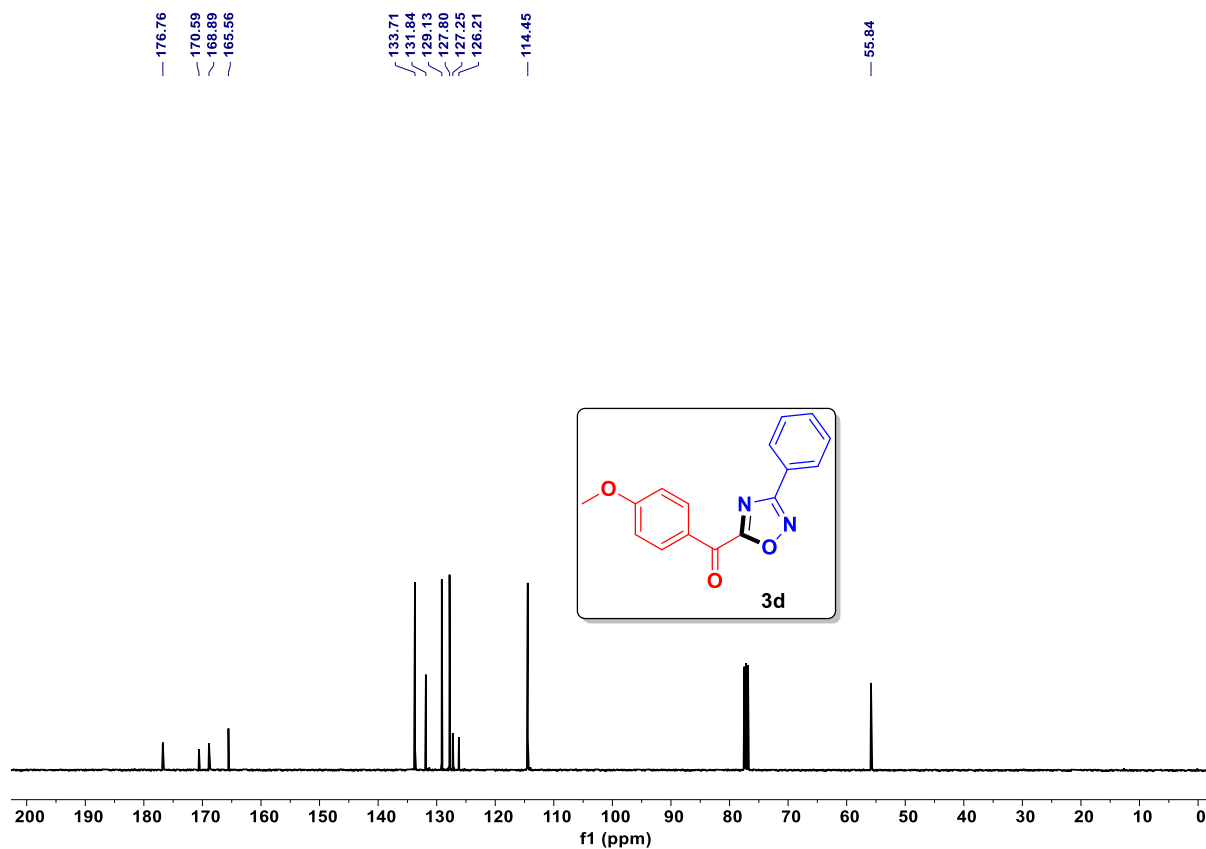

Figure 16.  $^{13}\text{C}\{^1\text{H}\}$  NMR (100 MHz,  $\text{CDCl}_3$ ) of compound 3d

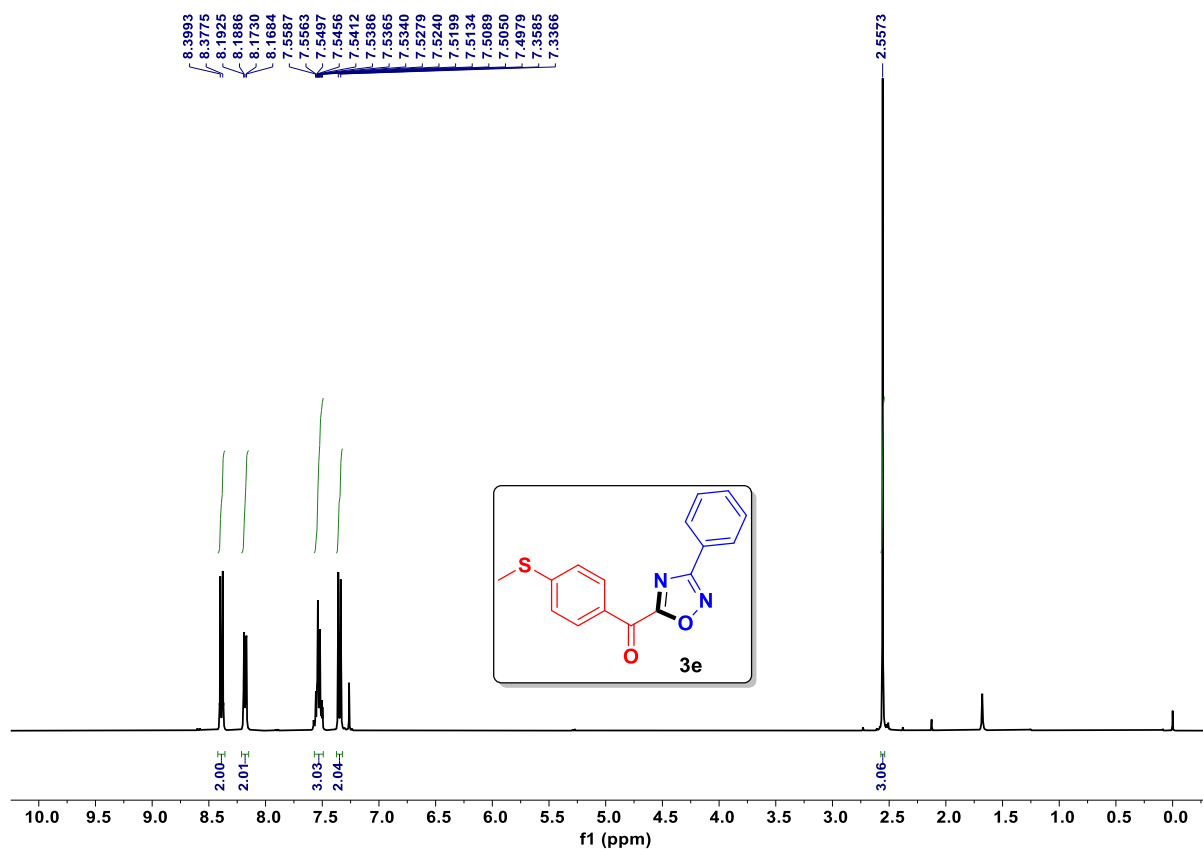

Figure 17.  $^1\text{H}$  NMR (400 MHz,  $\text{CDCl}_3$ ) of compound 3e

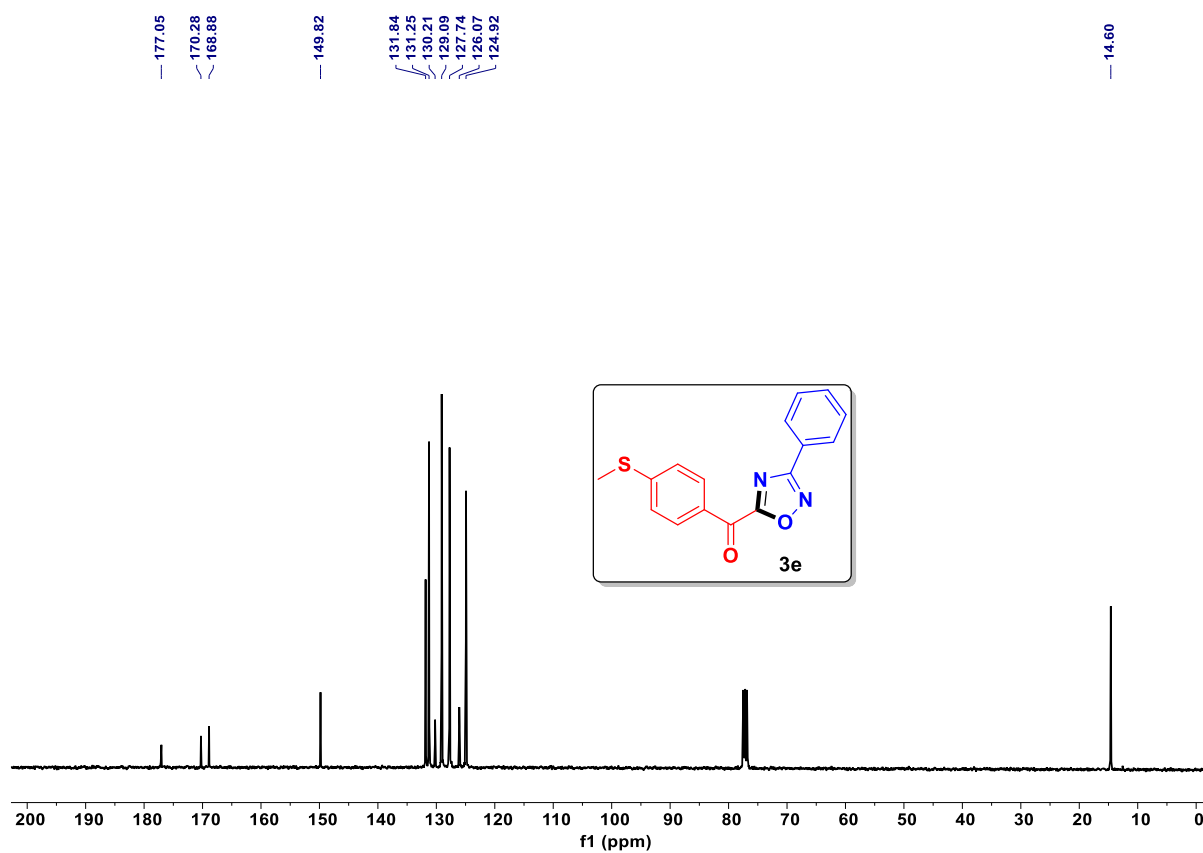

Figure 18.  $^{13}\text{C}\{^1\text{H}\}$  NMR (100 MHz,  $\text{CDCl}_3$ ) of compound 3e

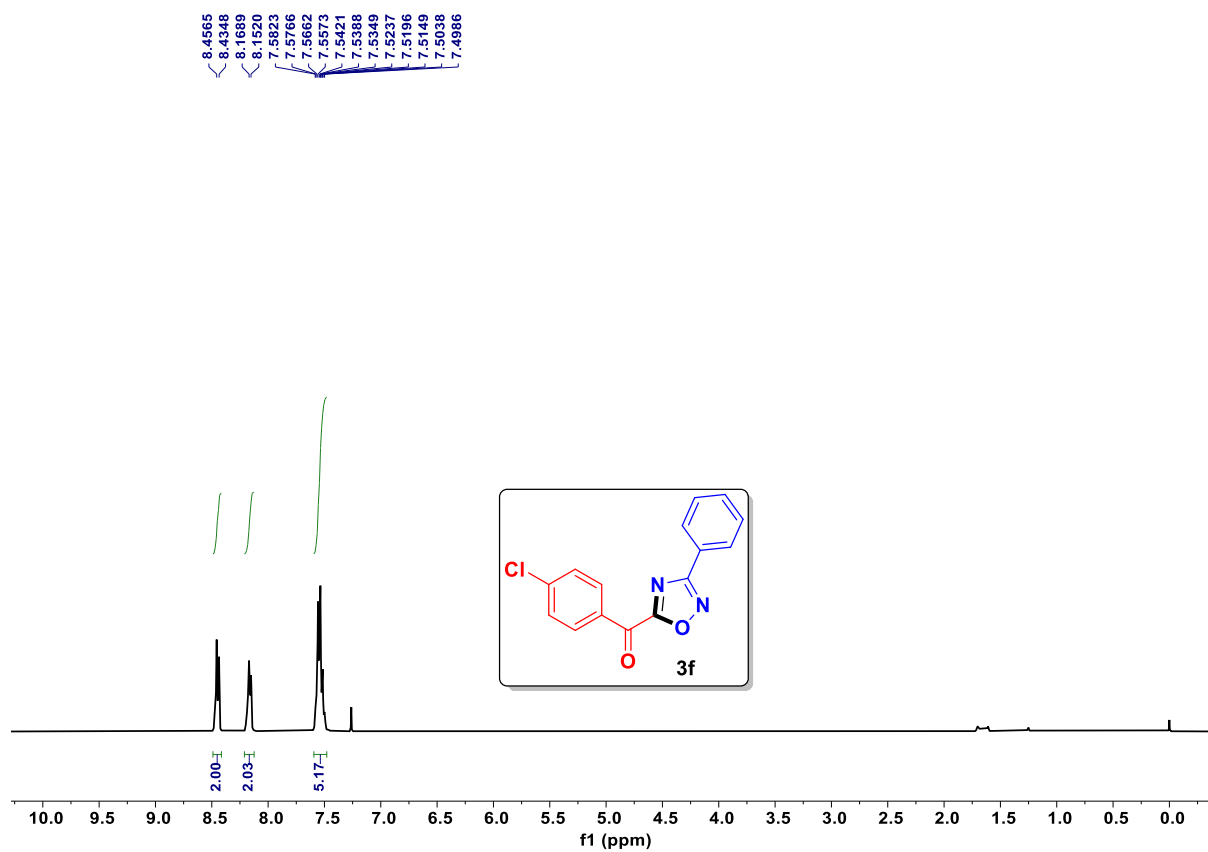

Figure 19.  $^1\text{H NMR}$  (400 MHz,  $\text{CDCl}_3$ ) of compound 3f

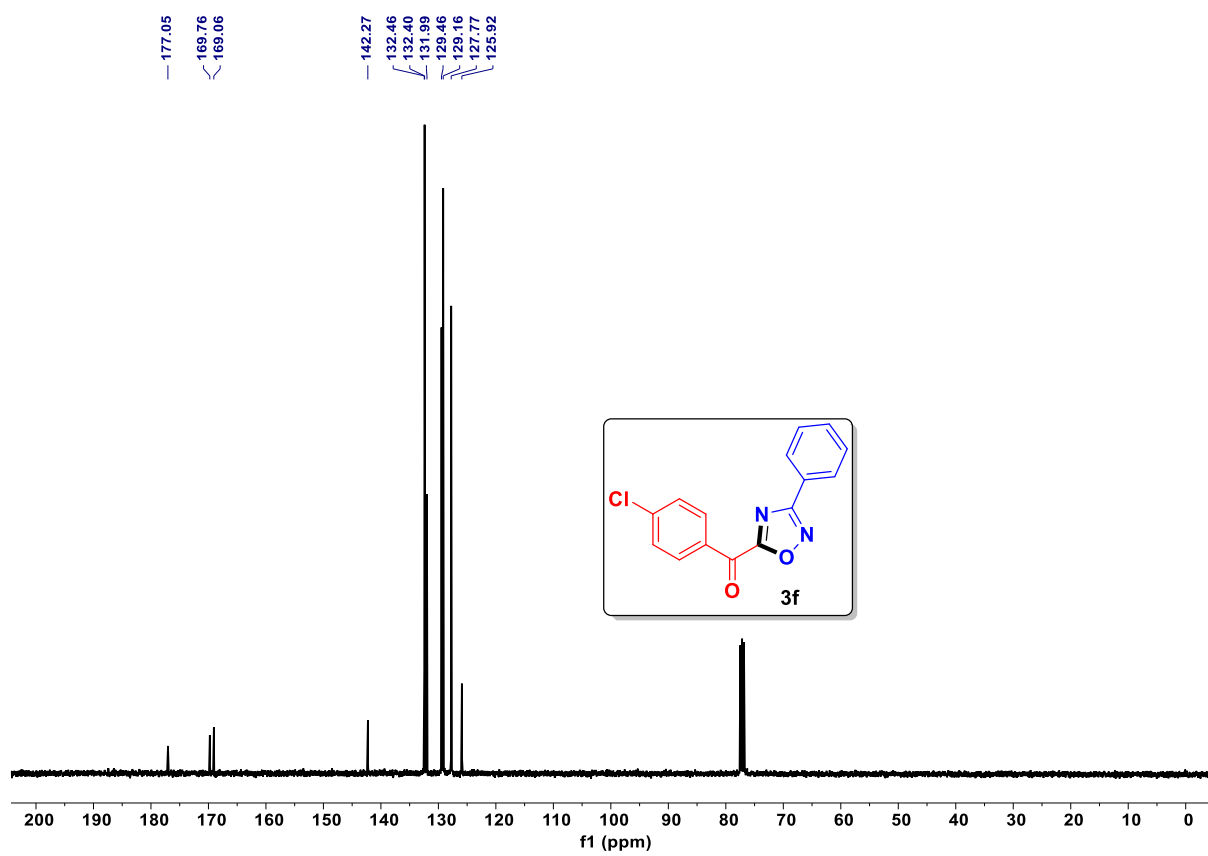

Figure 20.  $^{13}\text{C}\{^1\text{H}\}$  NMR (100 MHz,  $\text{CDCl}_3$ ) of compound 3f



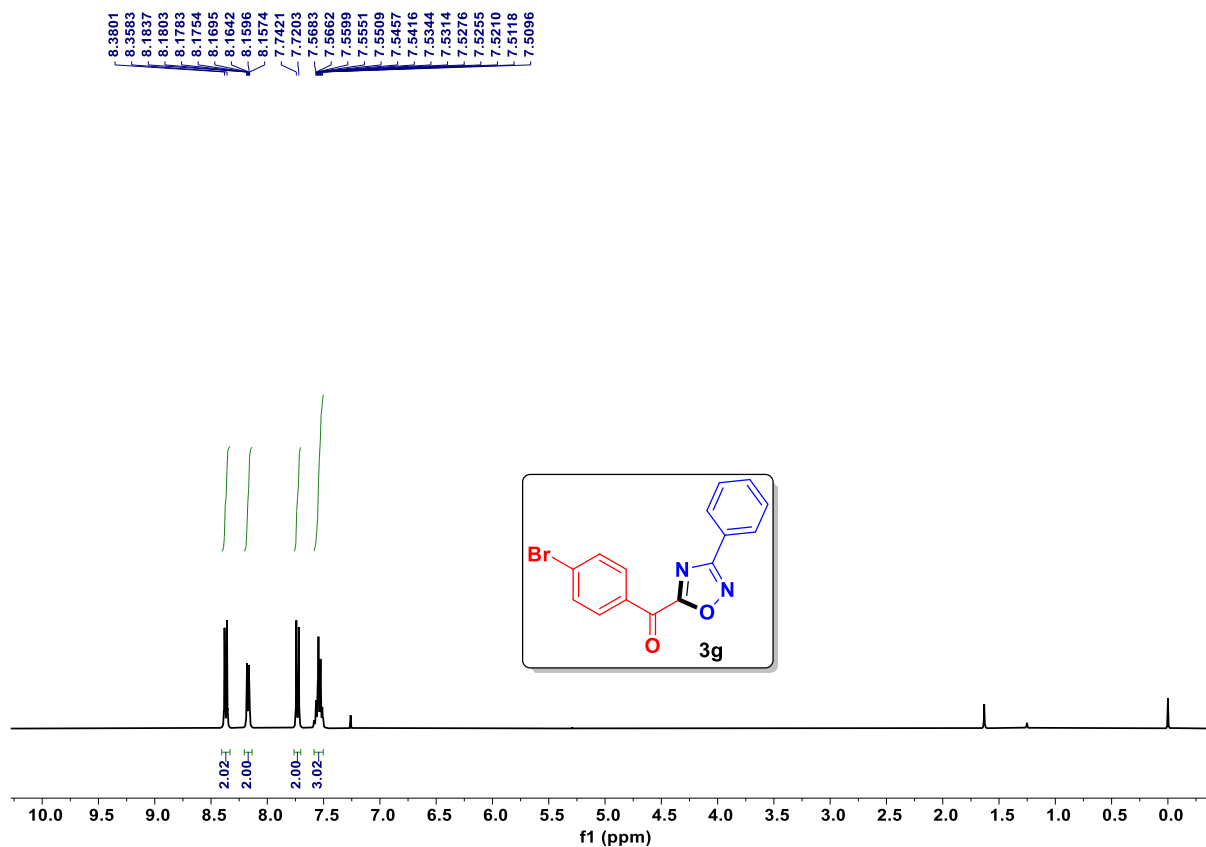

Figure 21.  $^1\text{H}$  NMR (400 MHz,  $\text{CDCl}_3$ ) of compound **3g**

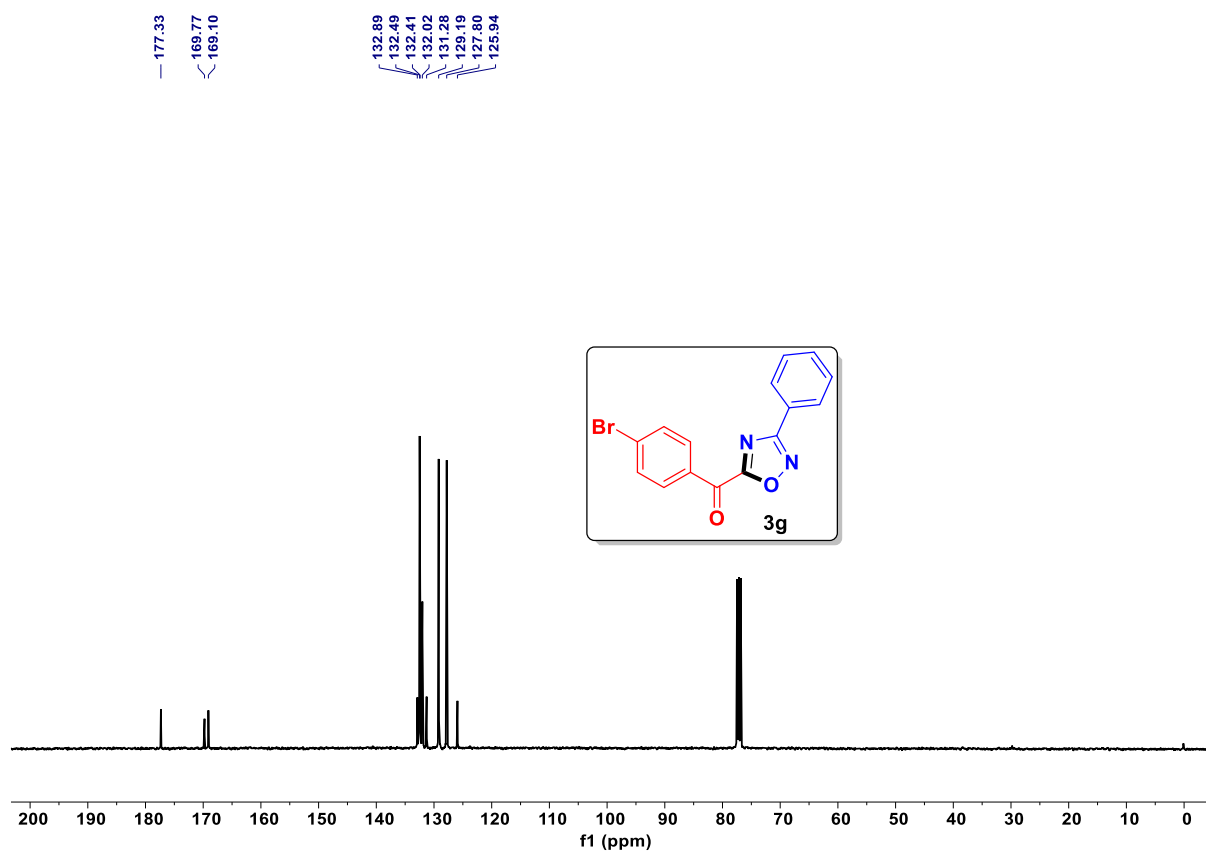

Figure 22.  $^{13}\text{C}\{^1\text{H}\}$  NMR (100 MHz,  $\text{CDCl}_3$ ) of compound **3g**

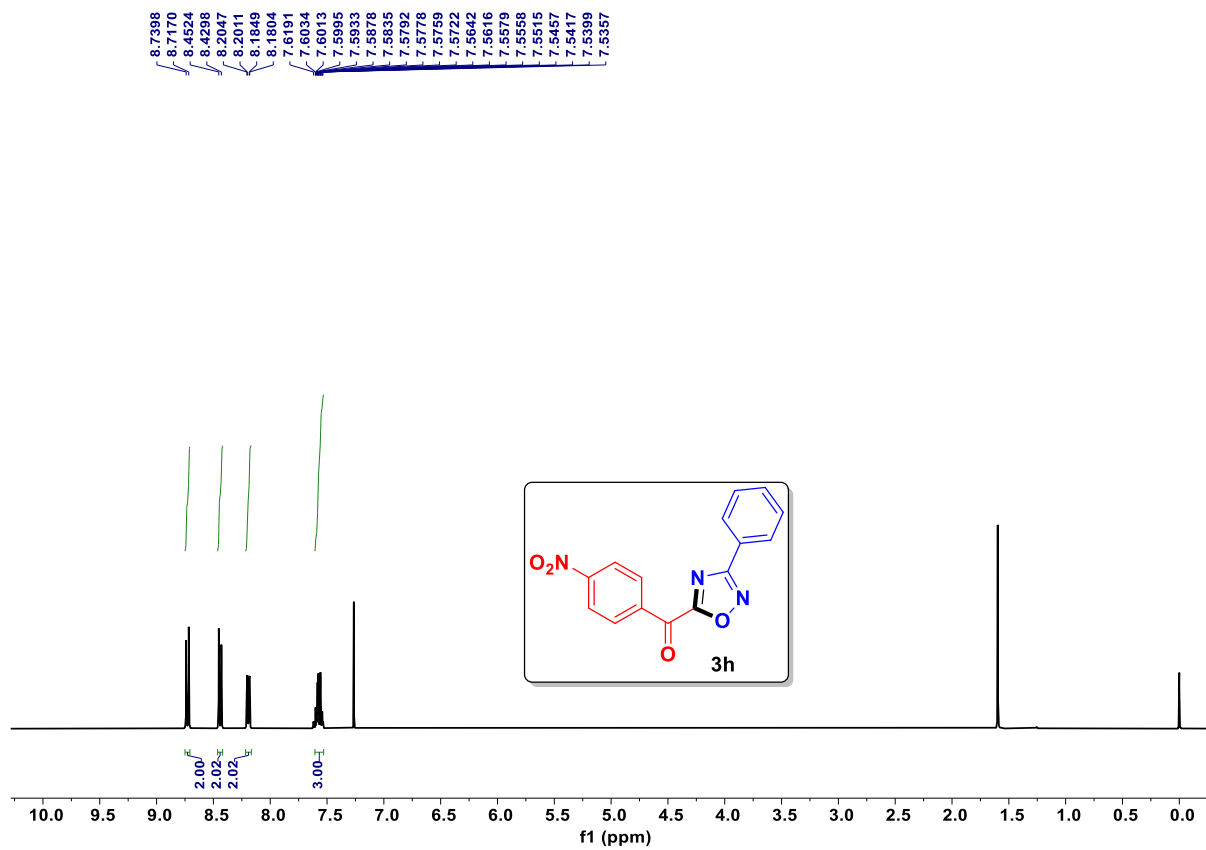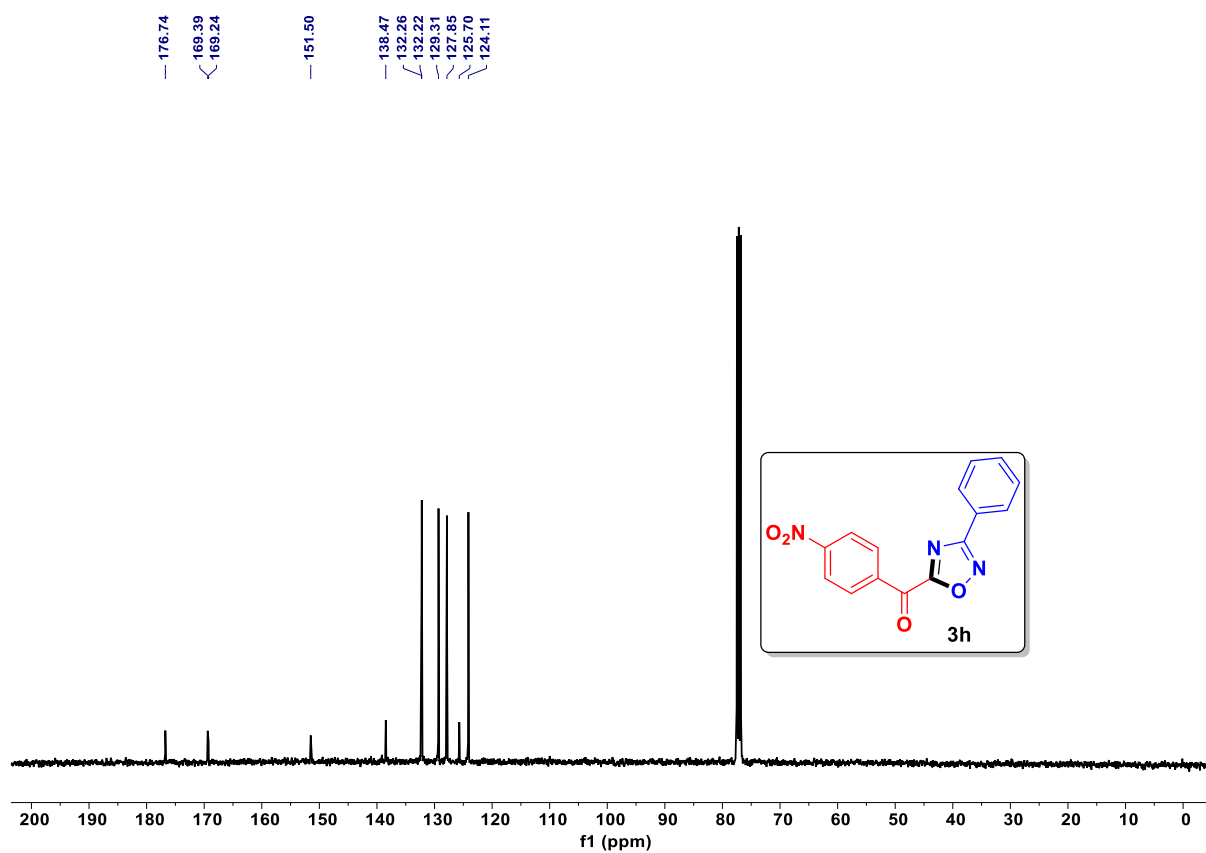

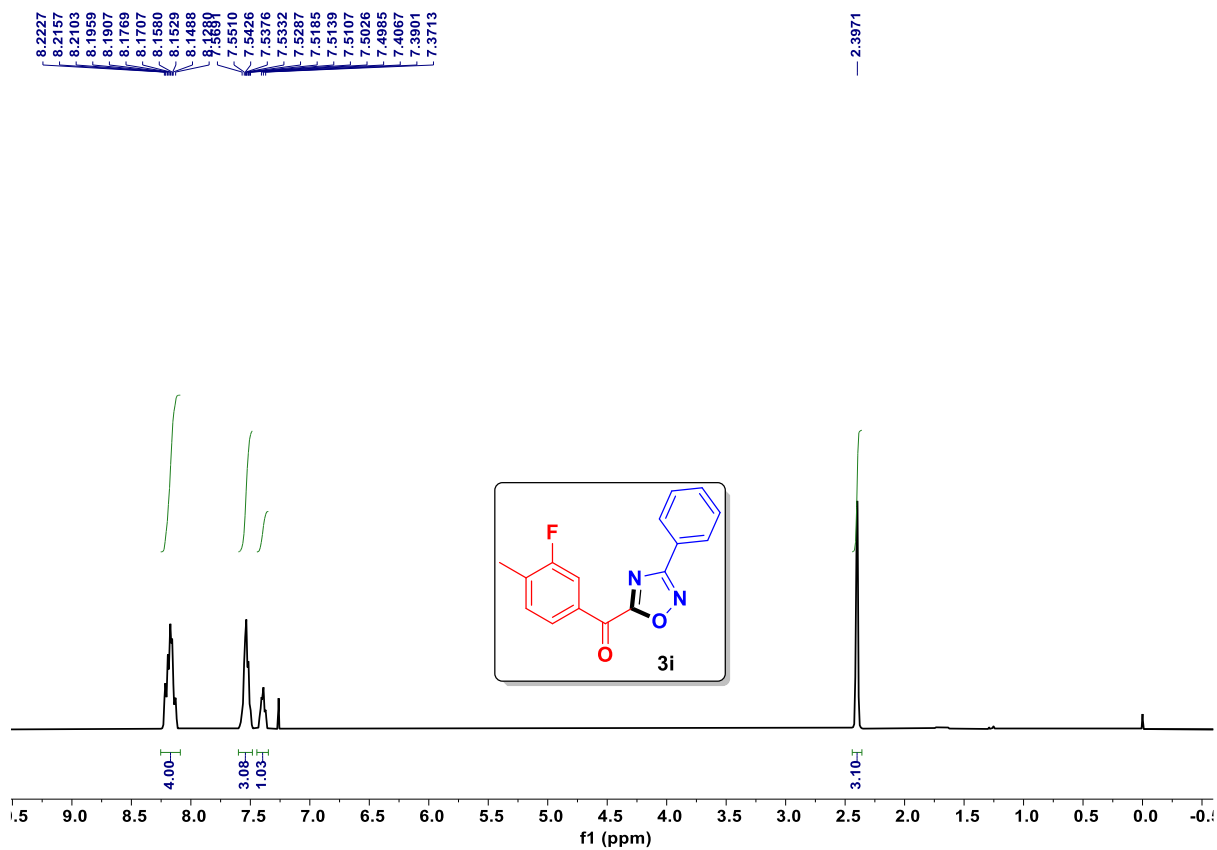

Figure 25. <sup>1</sup>H NMR (400 MHz, CDCl<sub>3</sub>) of compound **3i**

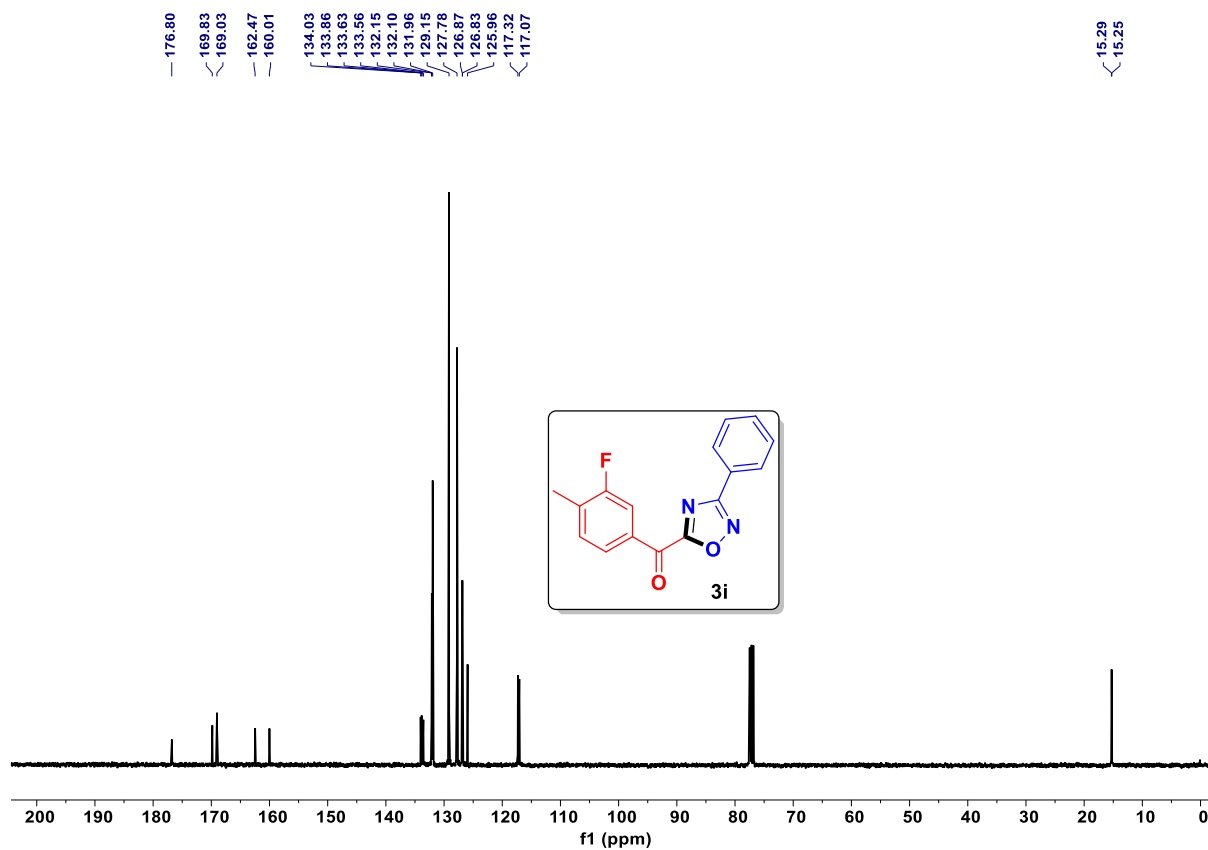

Figure 26. <sup>13</sup>C{<sup>1</sup>H} NMR (100 MHz, CDCl<sub>3</sub>) of compound **3i**

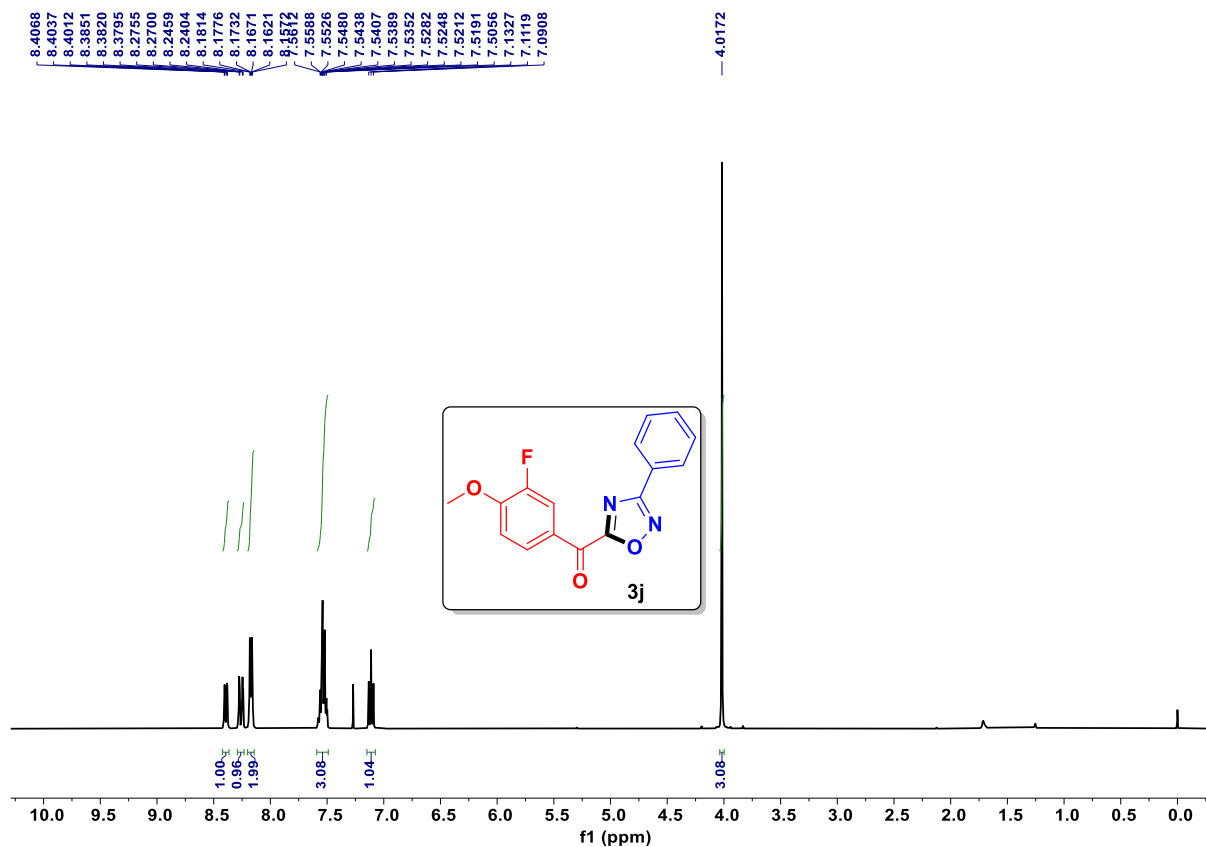

Figure 27. <sup>1</sup>H NMR (400 MHz, CDCl<sub>3</sub>) of compound **3j**

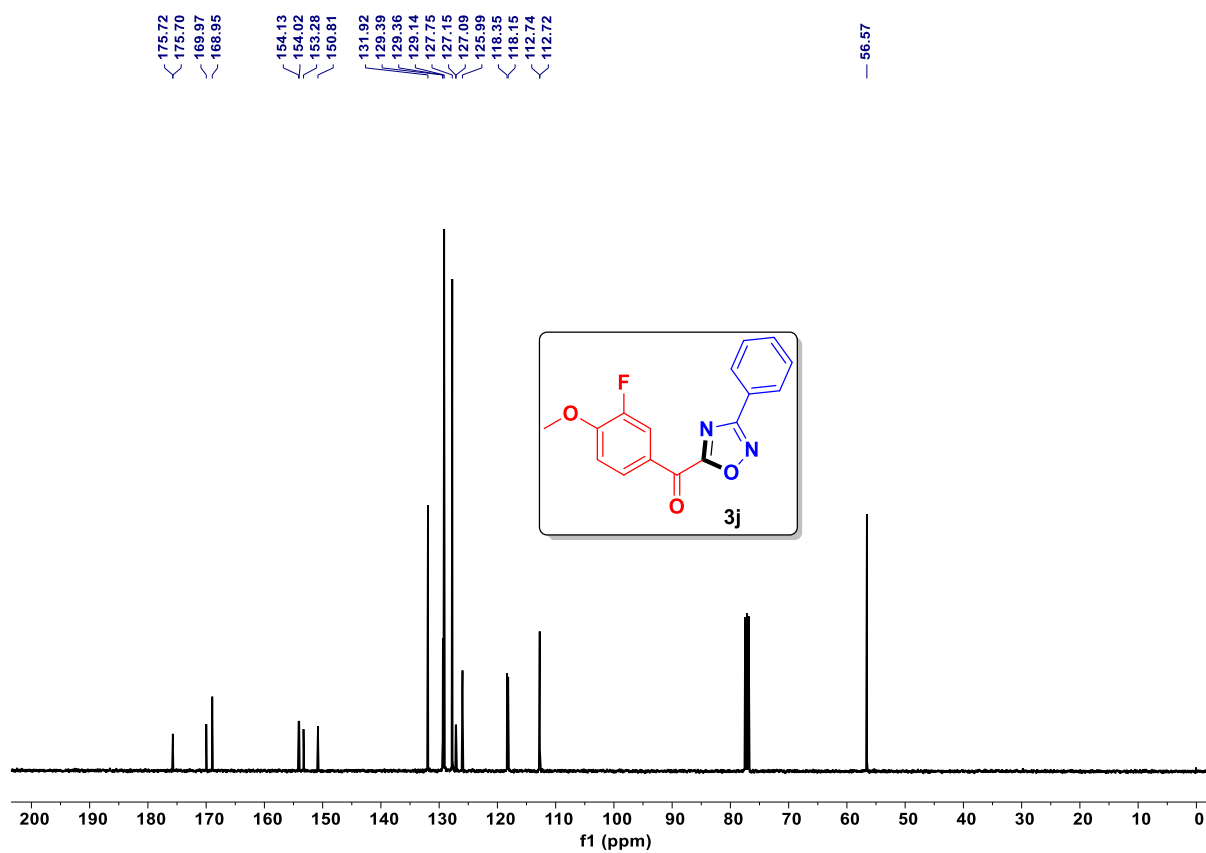

Figure 28. <sup>13</sup>C {<sup>1</sup>H} NMR (100 MHz, CDCl<sub>3</sub>) of compound **3j**

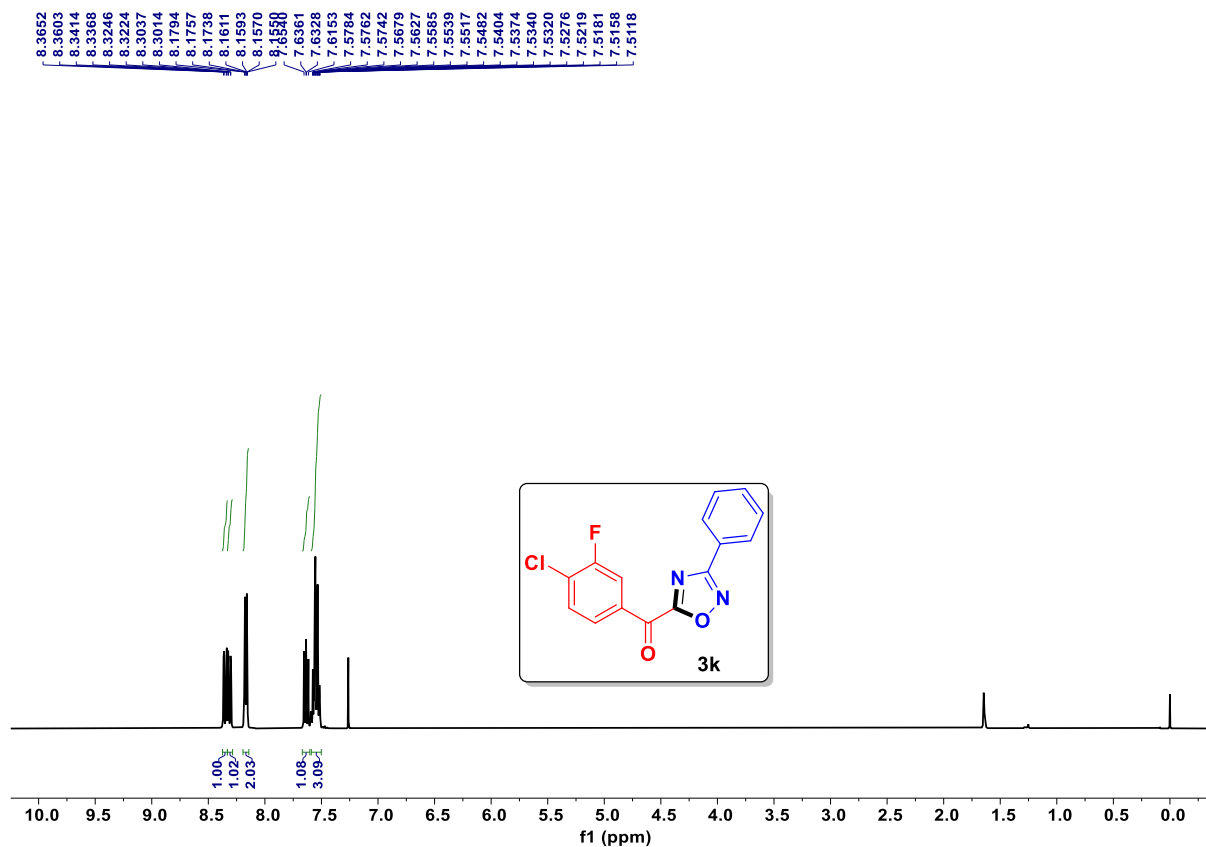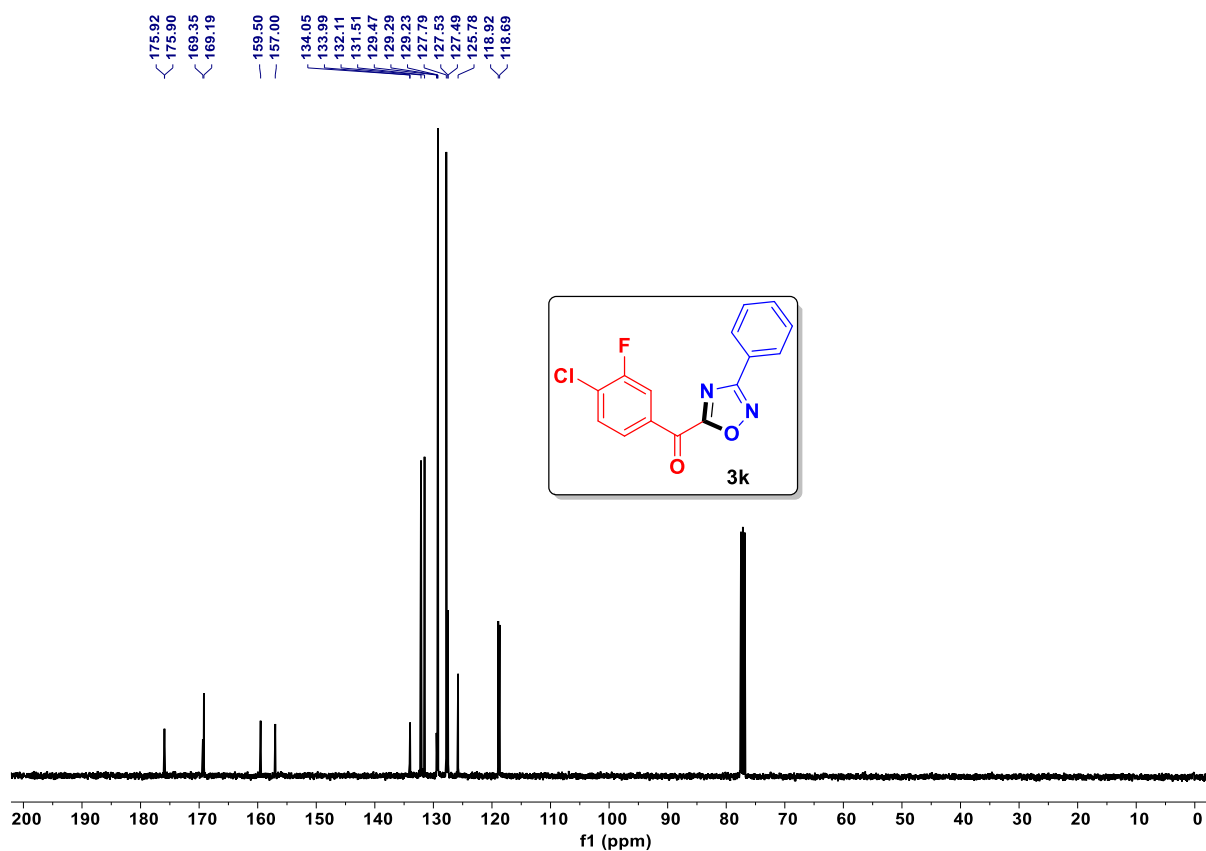

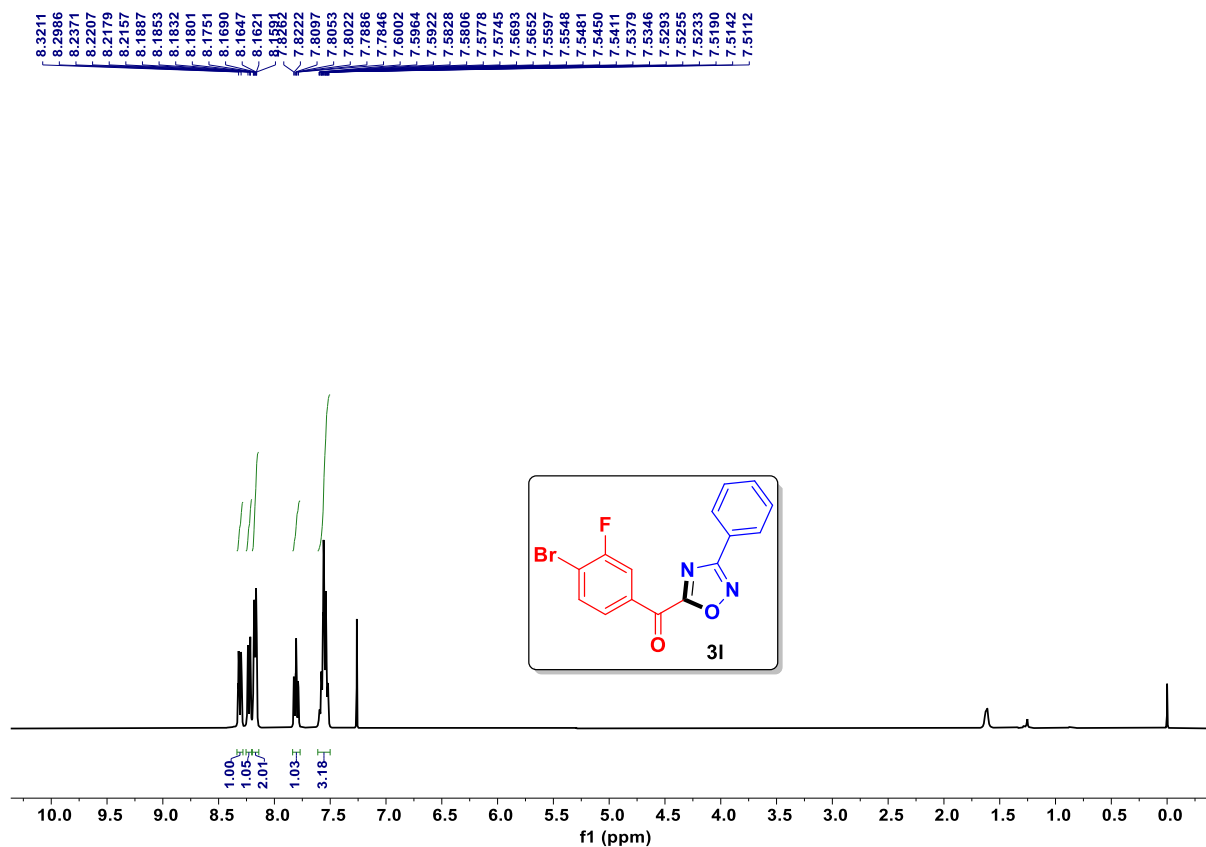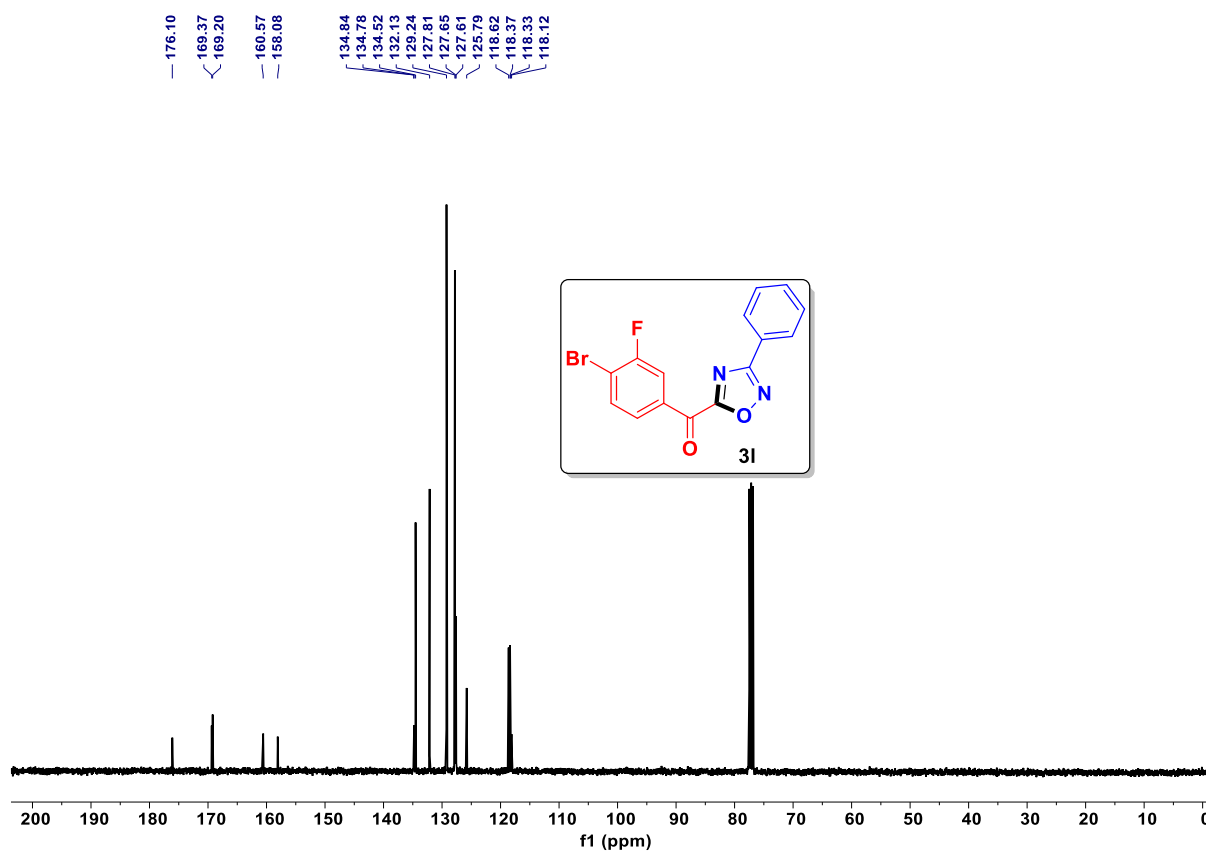

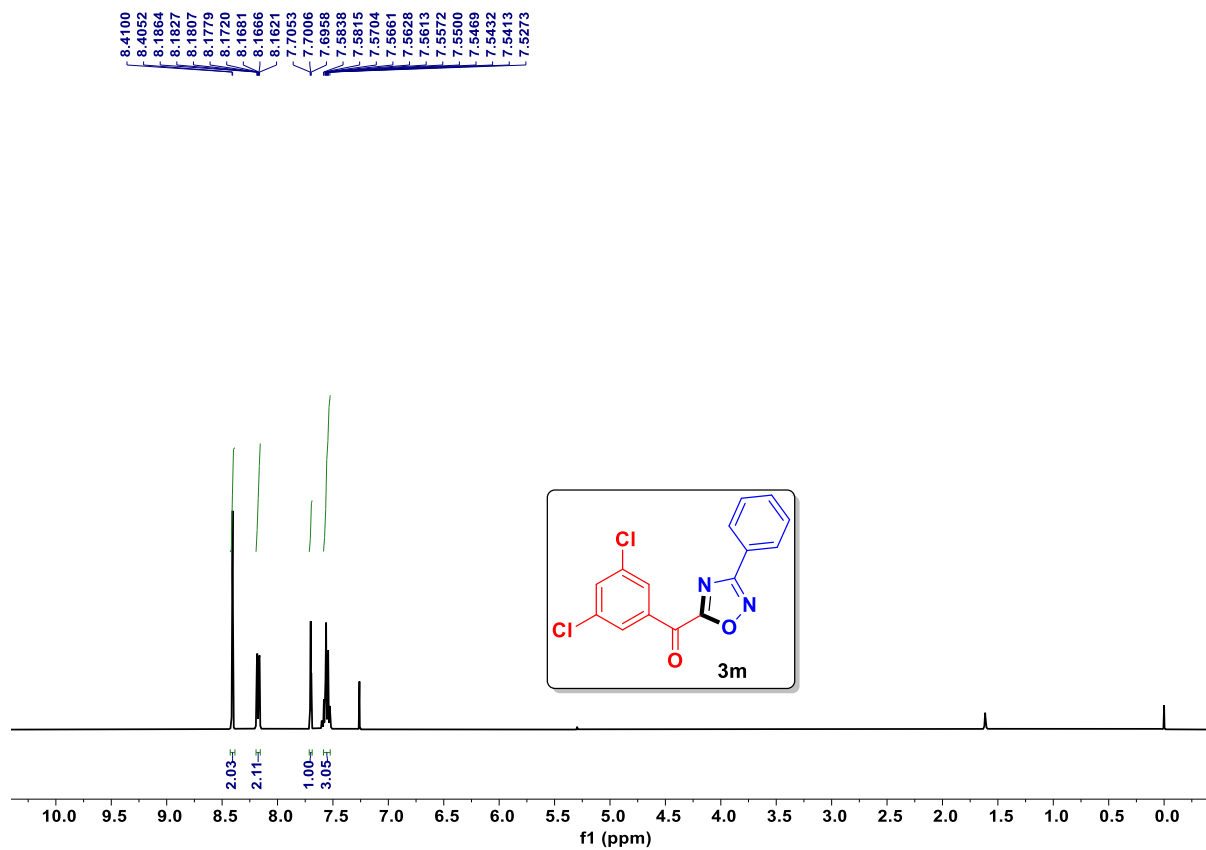

**Figure 33.**  $^1\text{H NMR}$  (400 MHz,  $\text{CDCl}_3$ ) of compound **3m**

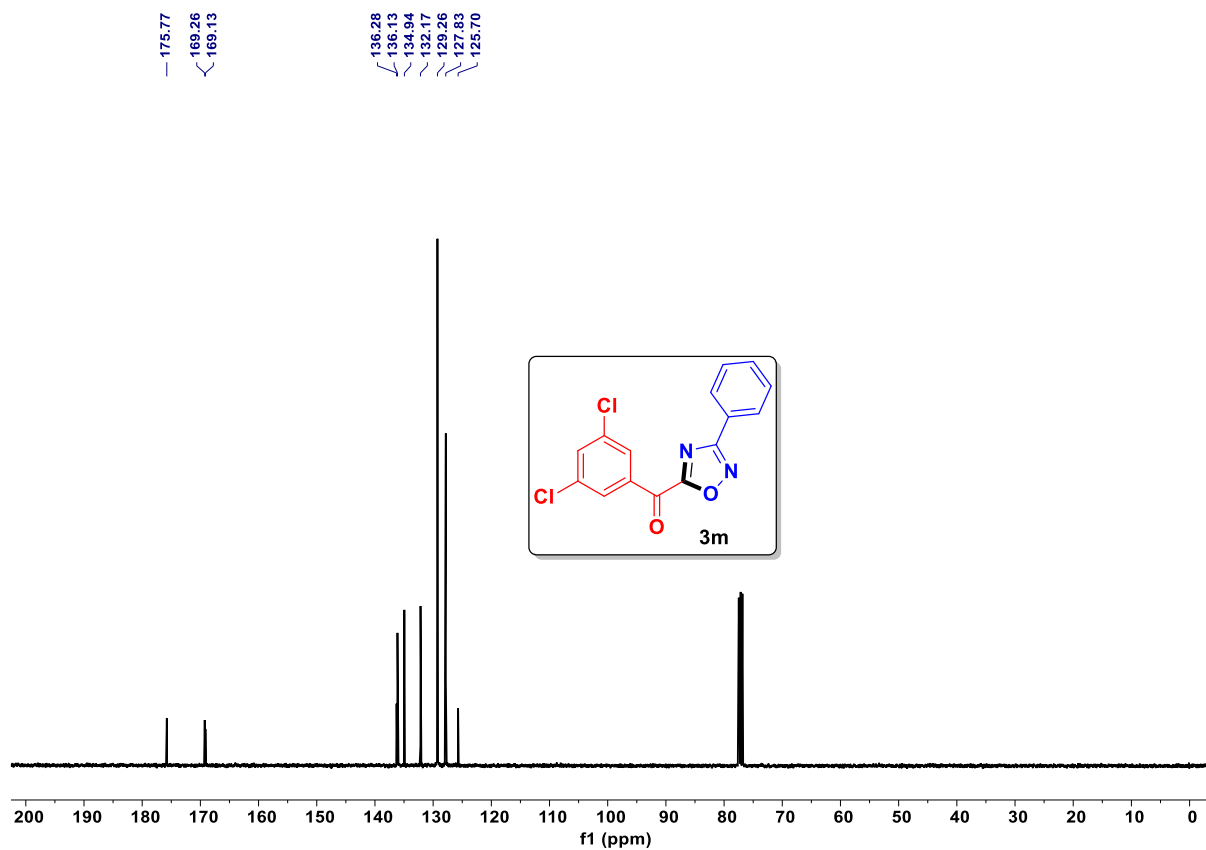

**Figure 34.**  $^{13}\text{C}\{^1\text{H}\}$  NMR (100 MHz,  $\text{CDCl}_3$ ) of compound **3m**

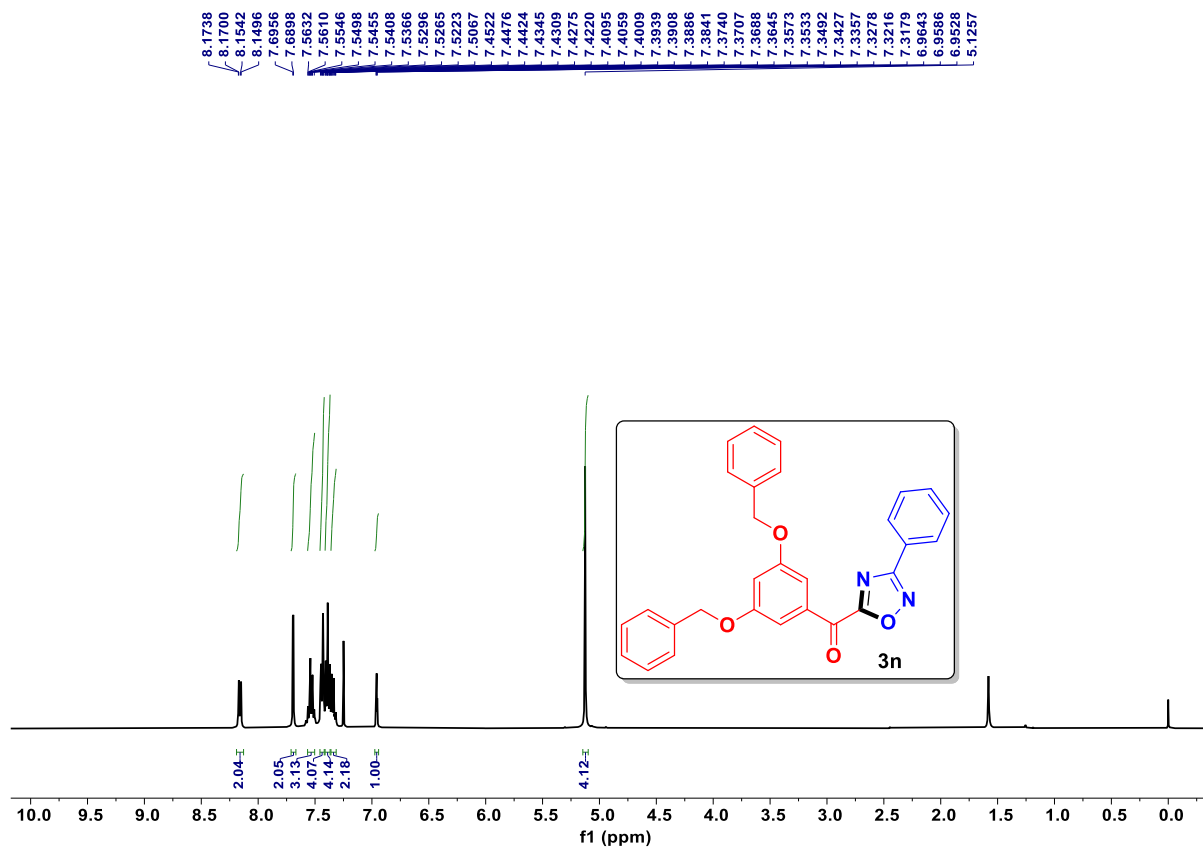

Figure 35.  $^1\text{H}$  NMR (400 MHz,  $\text{CDCl}_3$ ) of compound **3n**

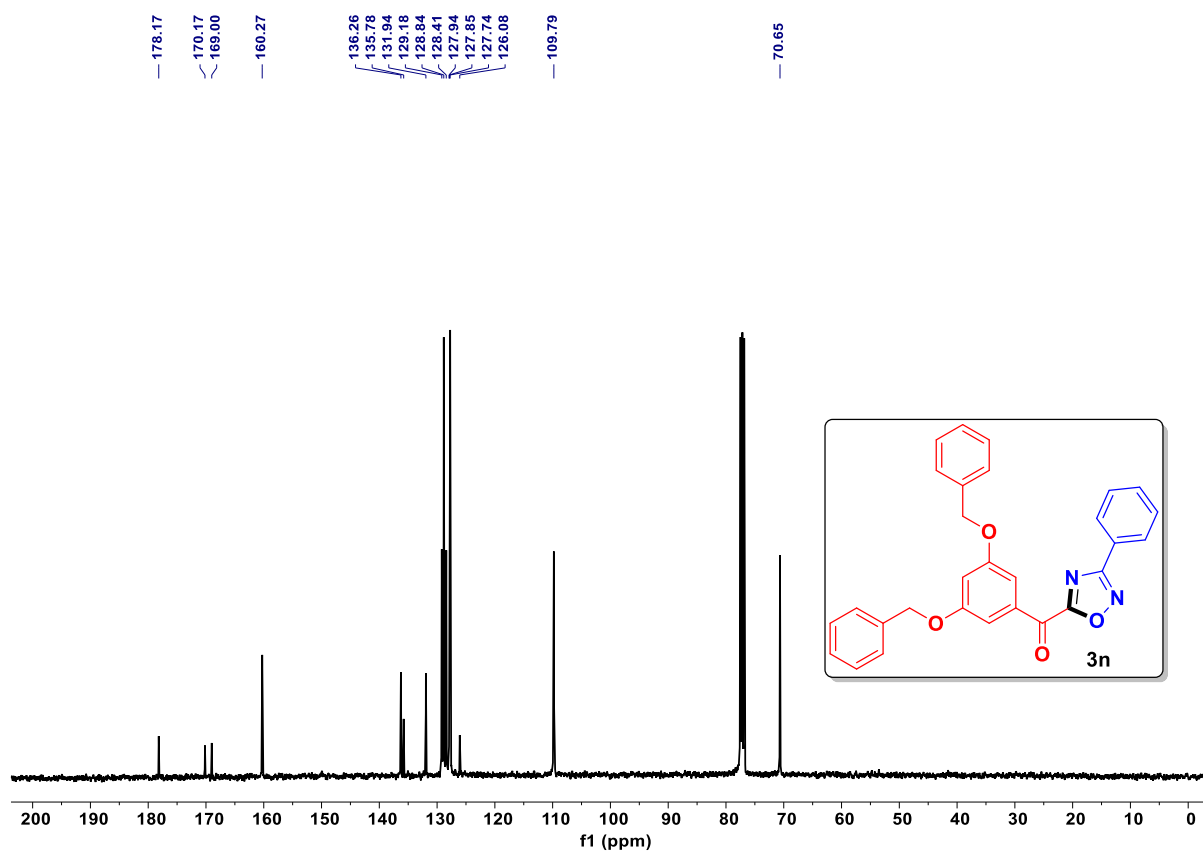

Figure 36.  $^{13}\text{C}\{^1\text{H}\}$  NMR (100 MHz,  $\text{CDCl}_3$ ) of compound **3n**



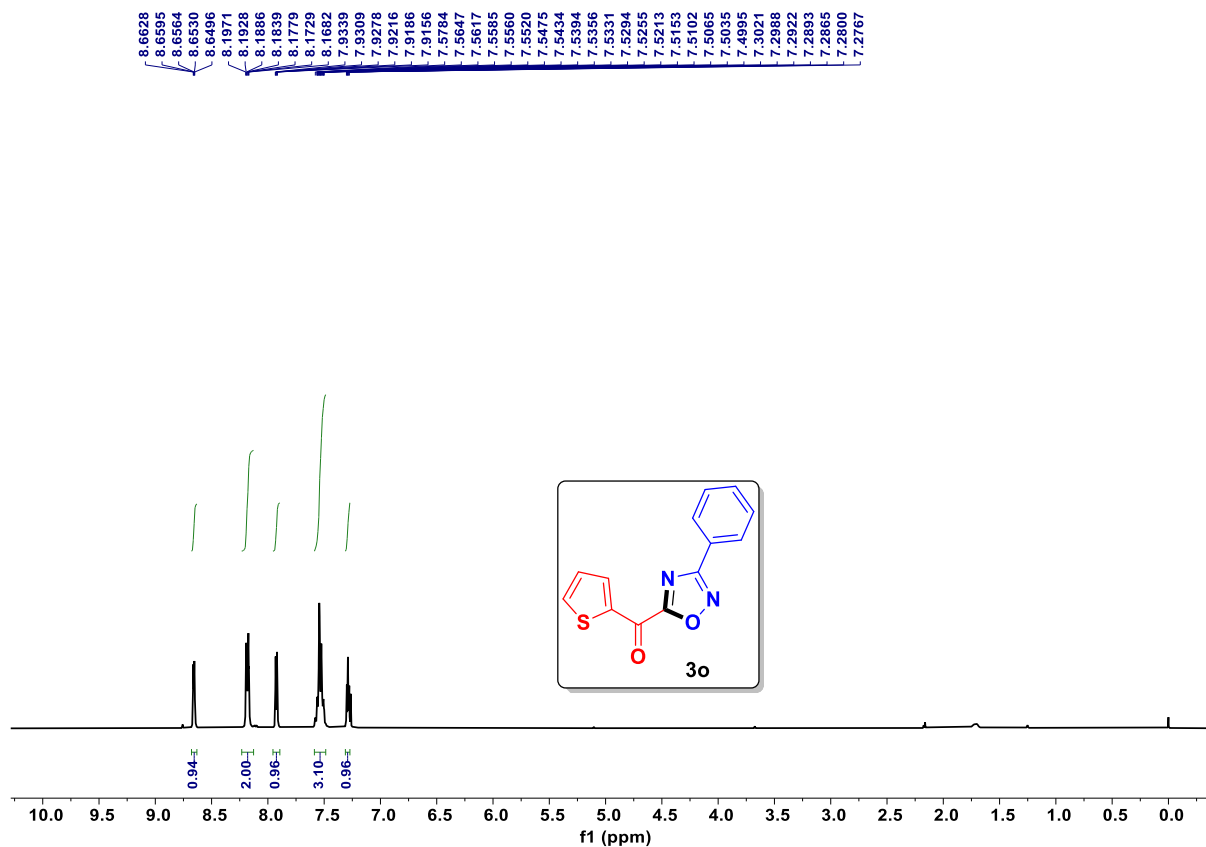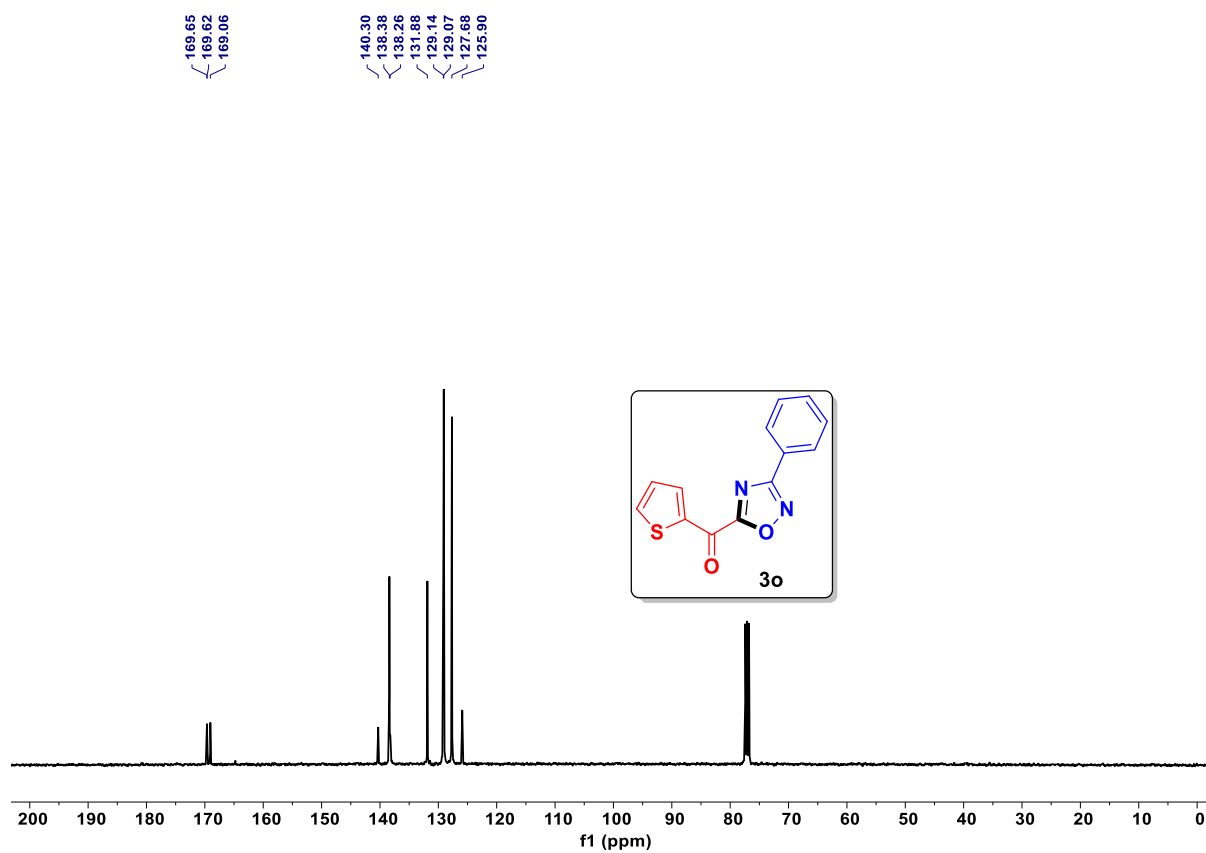

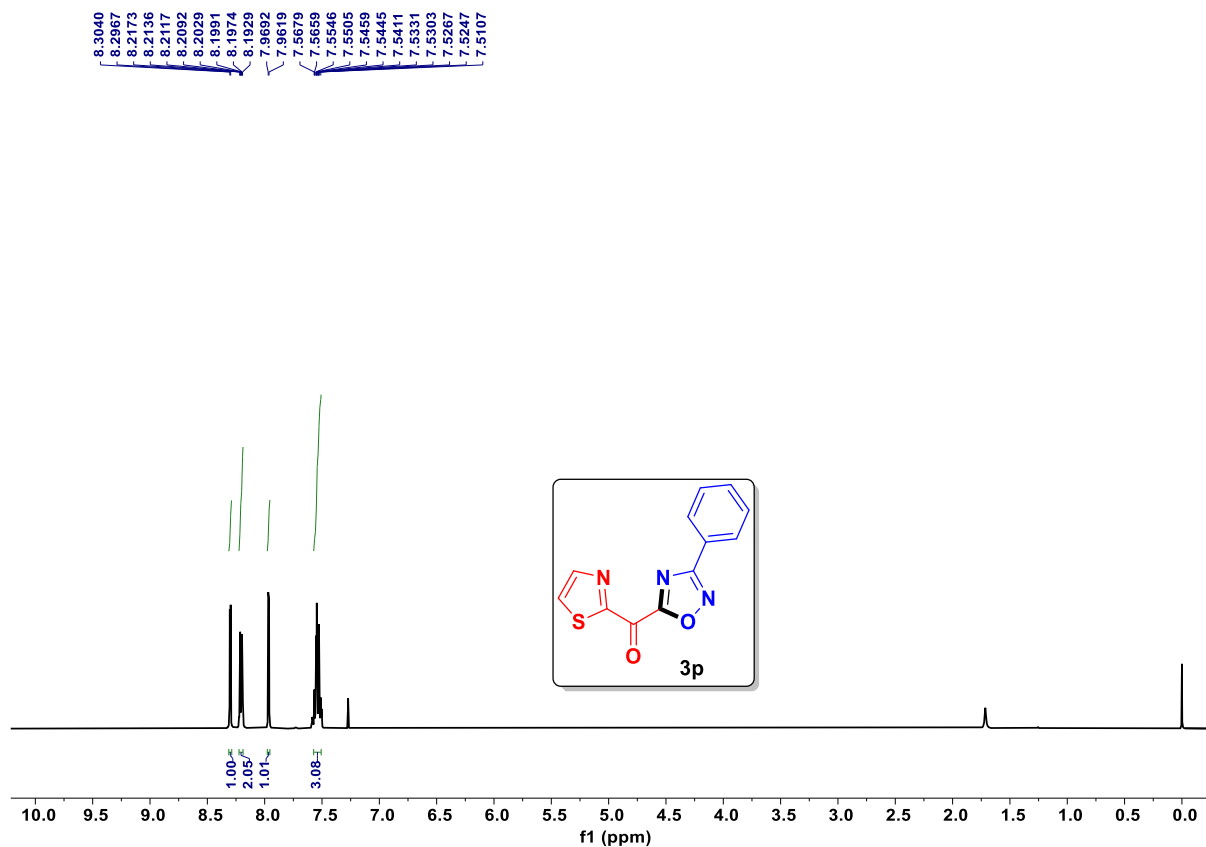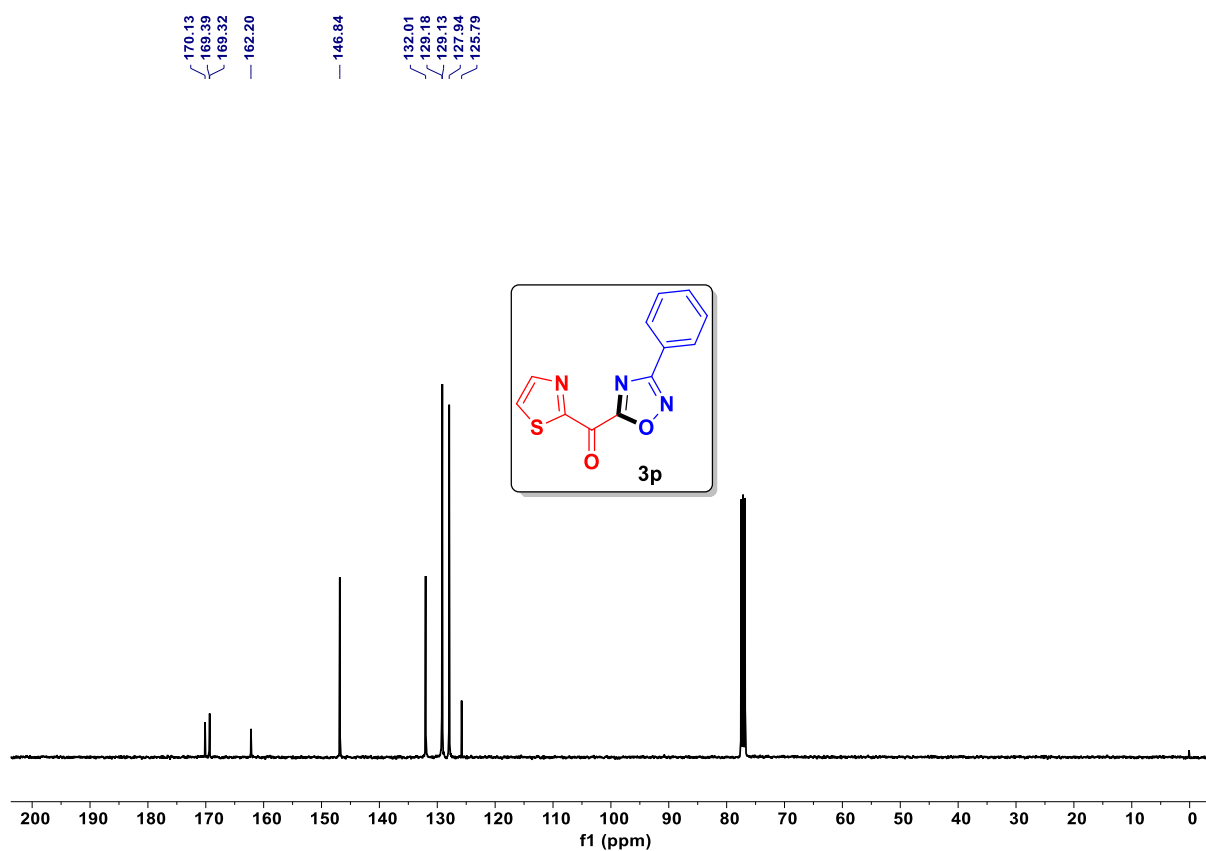

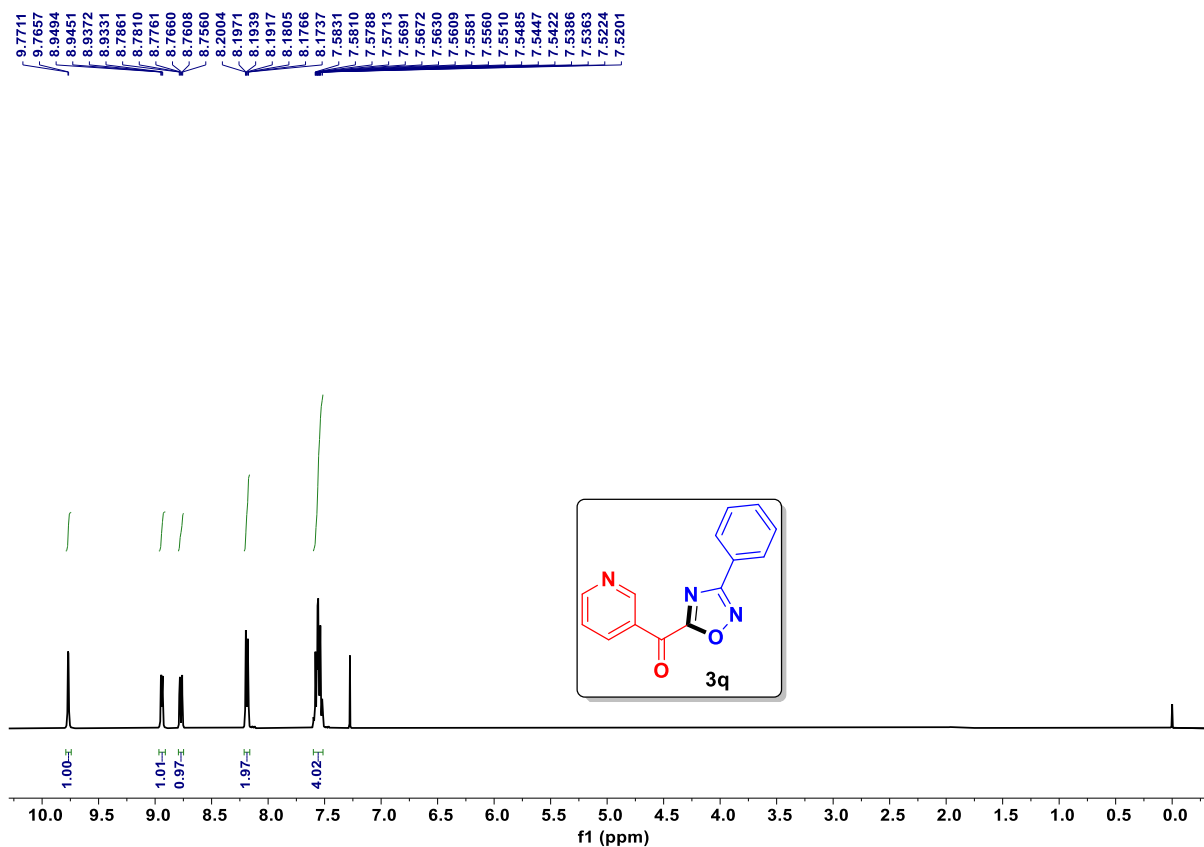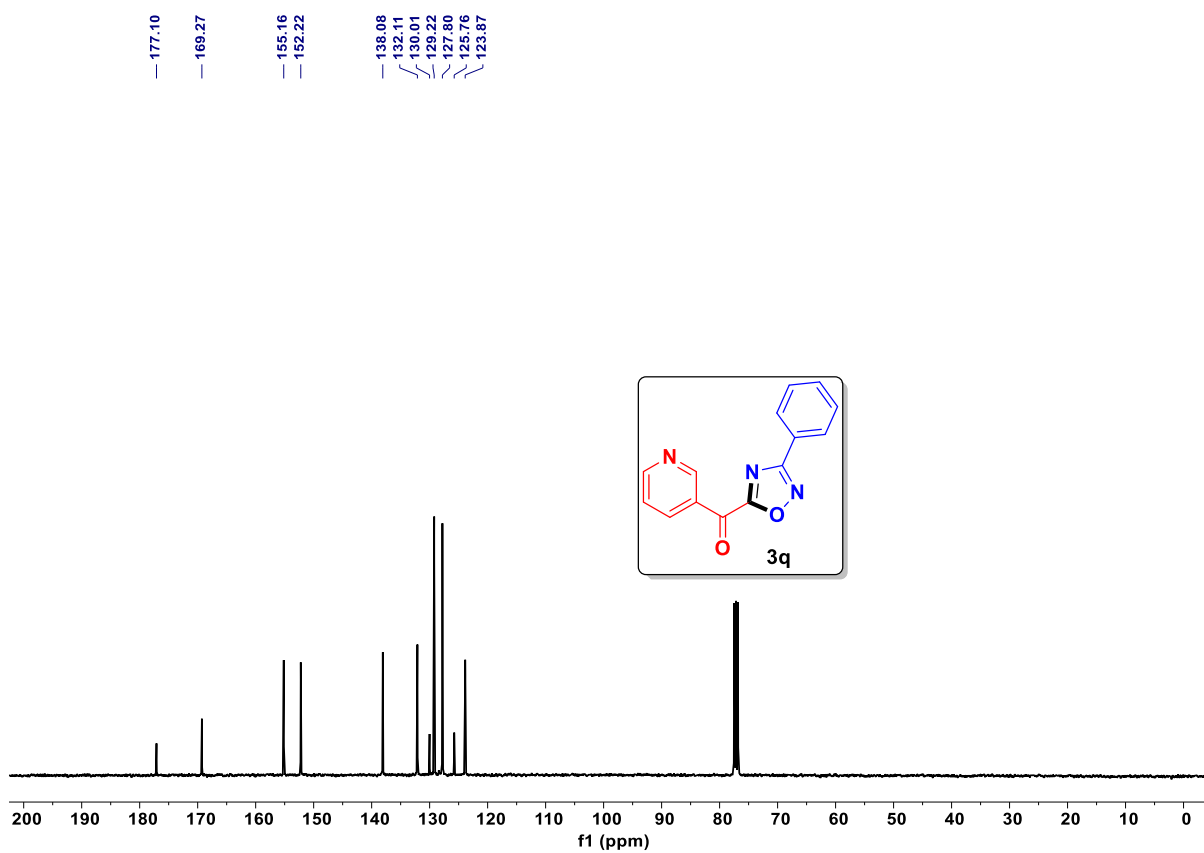

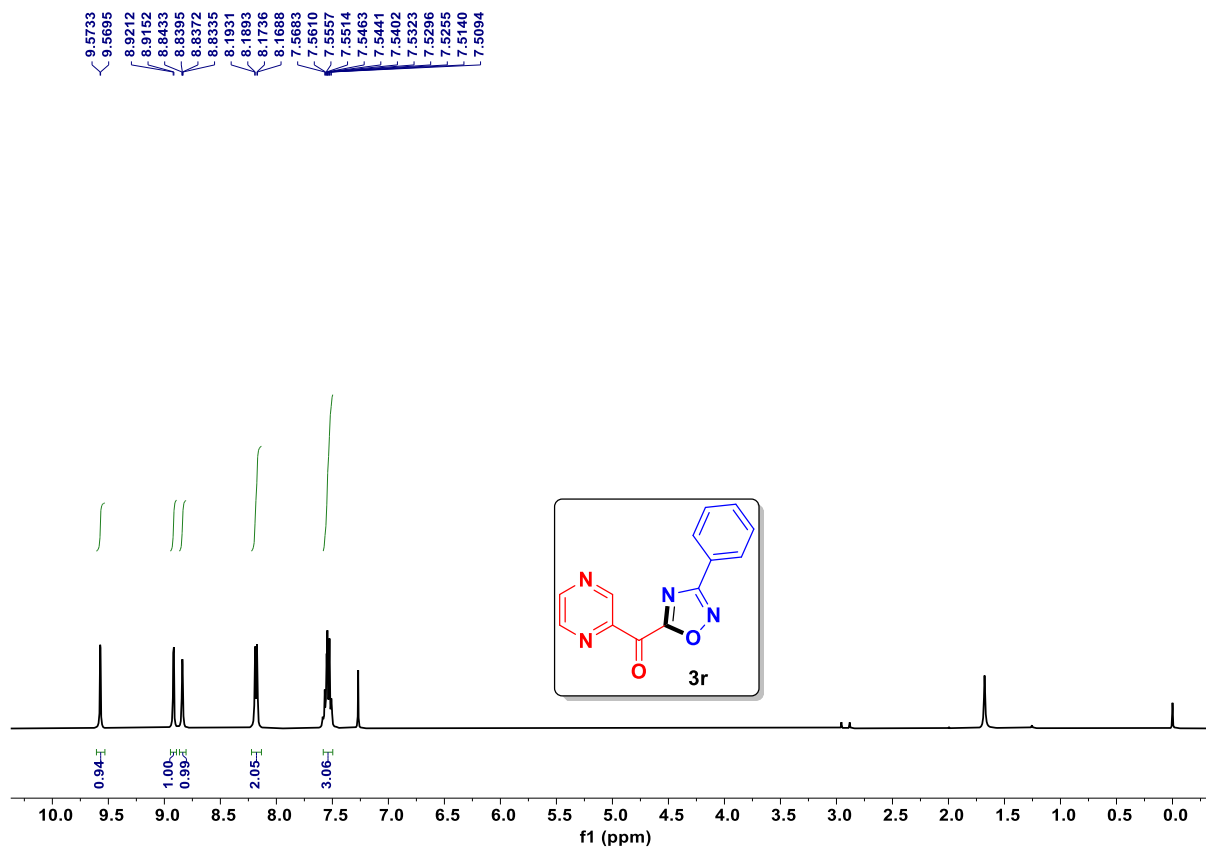

Figure 43.  $^1\text{H}$  NMR (400 MHz,  $\text{CDCl}_3$ ) of compound 3r

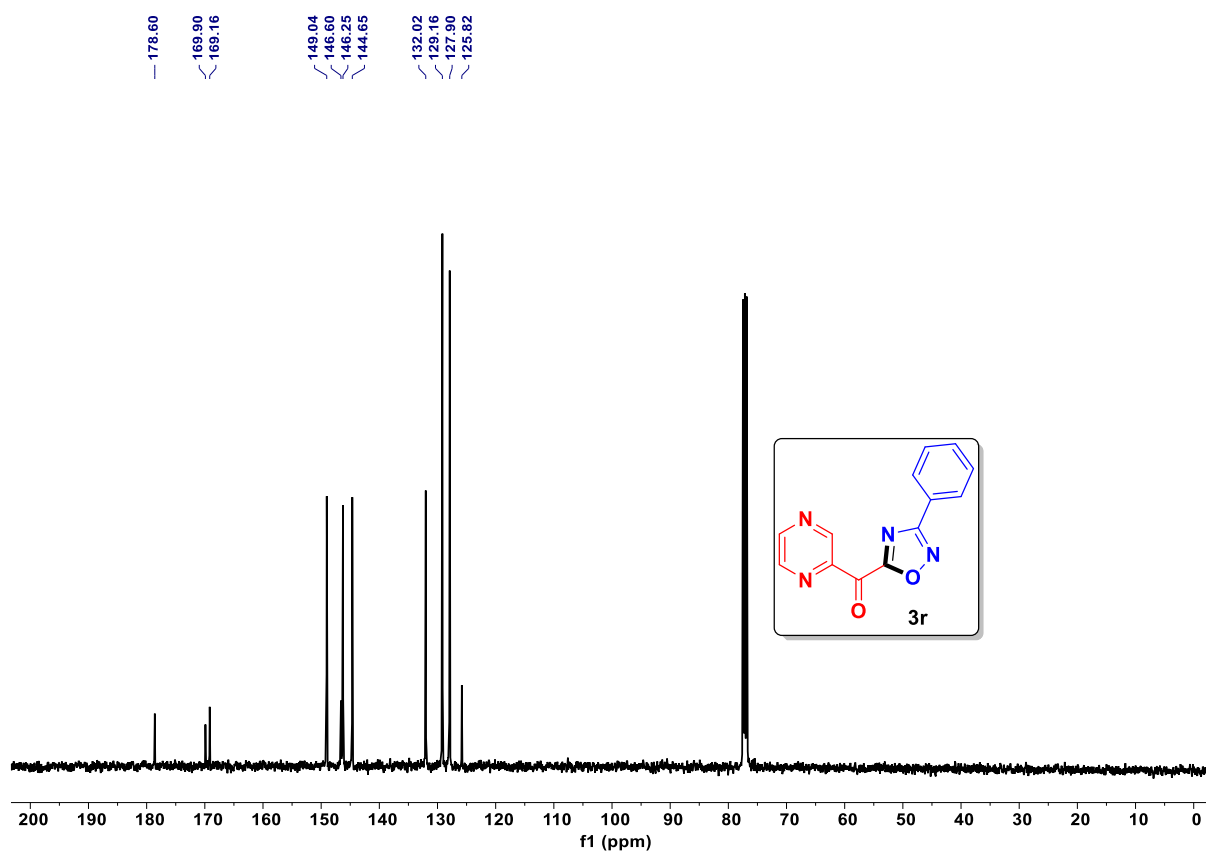

Figure 44.  $^{13}\text{C}\{^1\text{H}\}$  NMR (100 MHz,  $\text{CDCl}_3$ ) of compound 3r

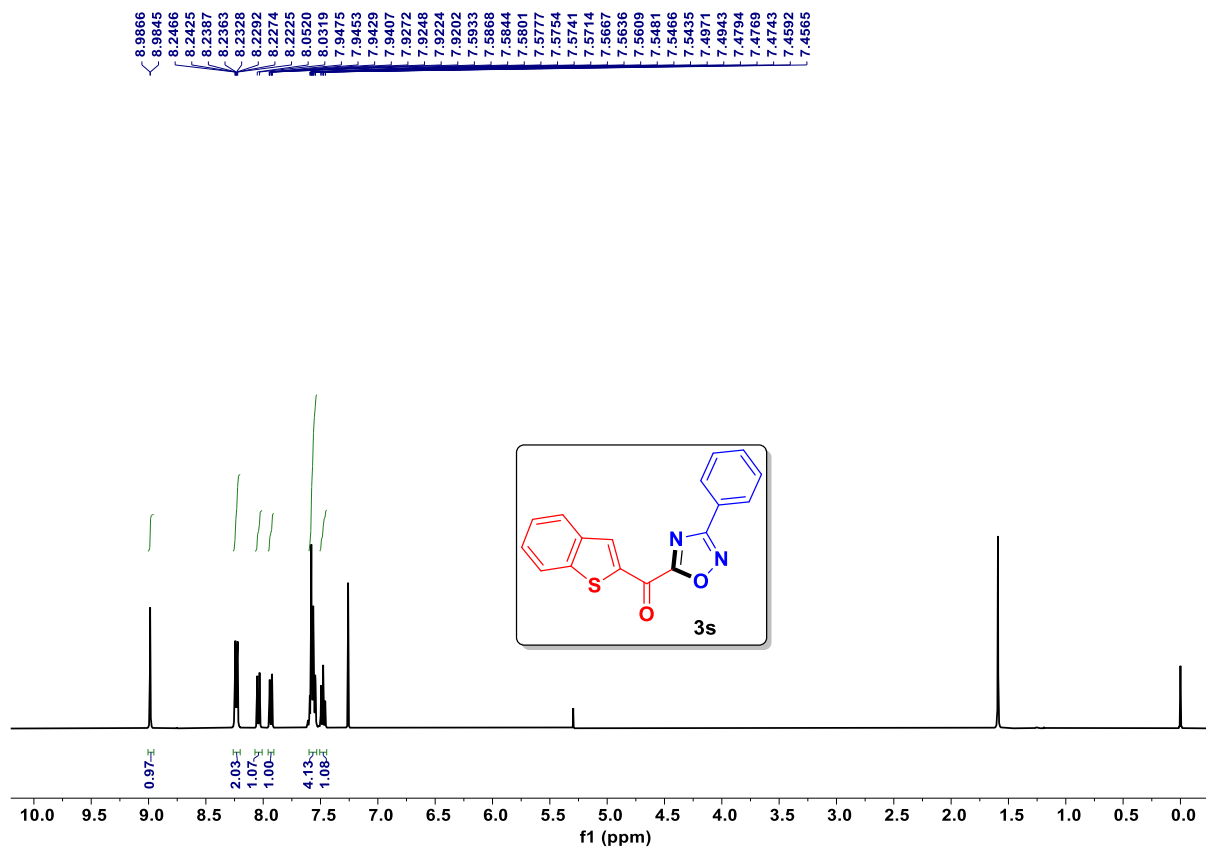

Figure 45.  $^1\text{H NMR}$  (400 MHz,  $\text{CDCl}_3$ ) of compound 3s

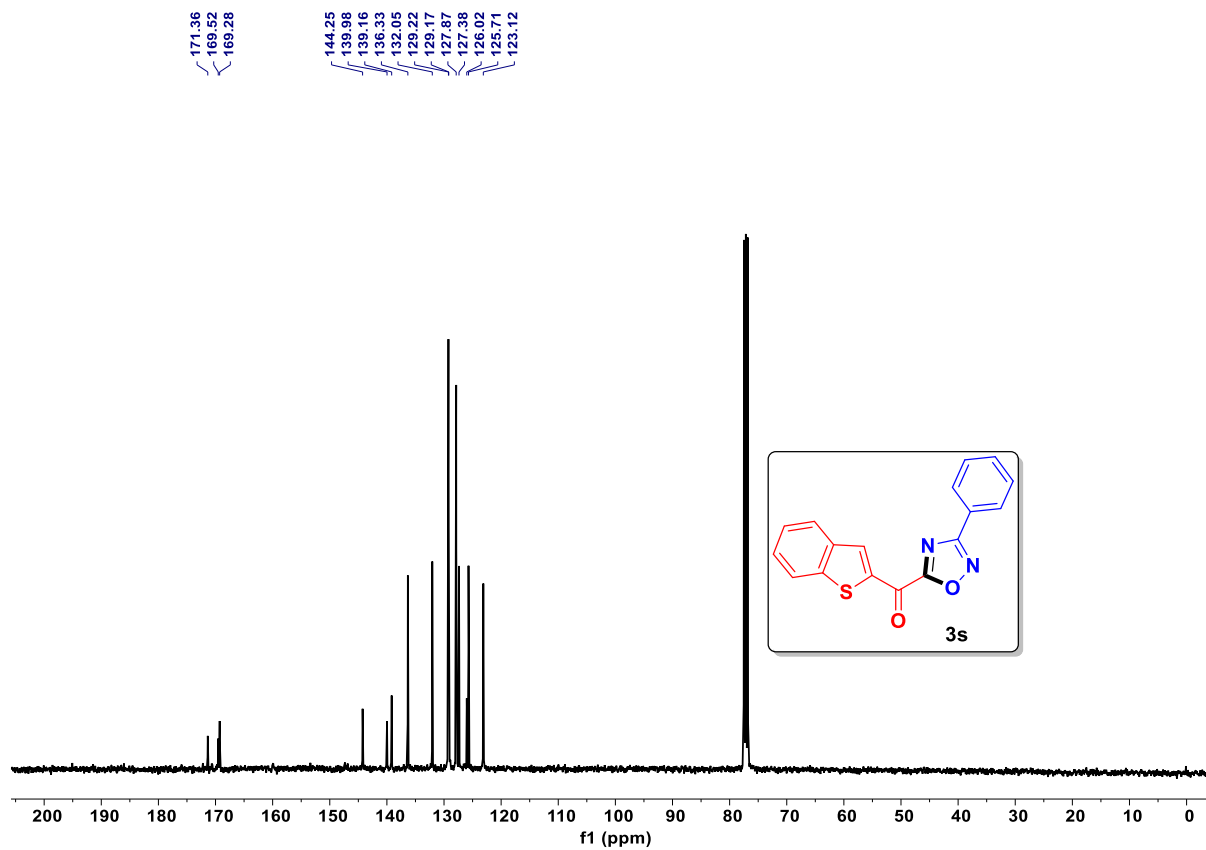

Figure 46.  $^{13}\text{C}\{^1\text{H}\}$  NMR (100 MHz,  $\text{CDCl}_3$ ) of compound 3s

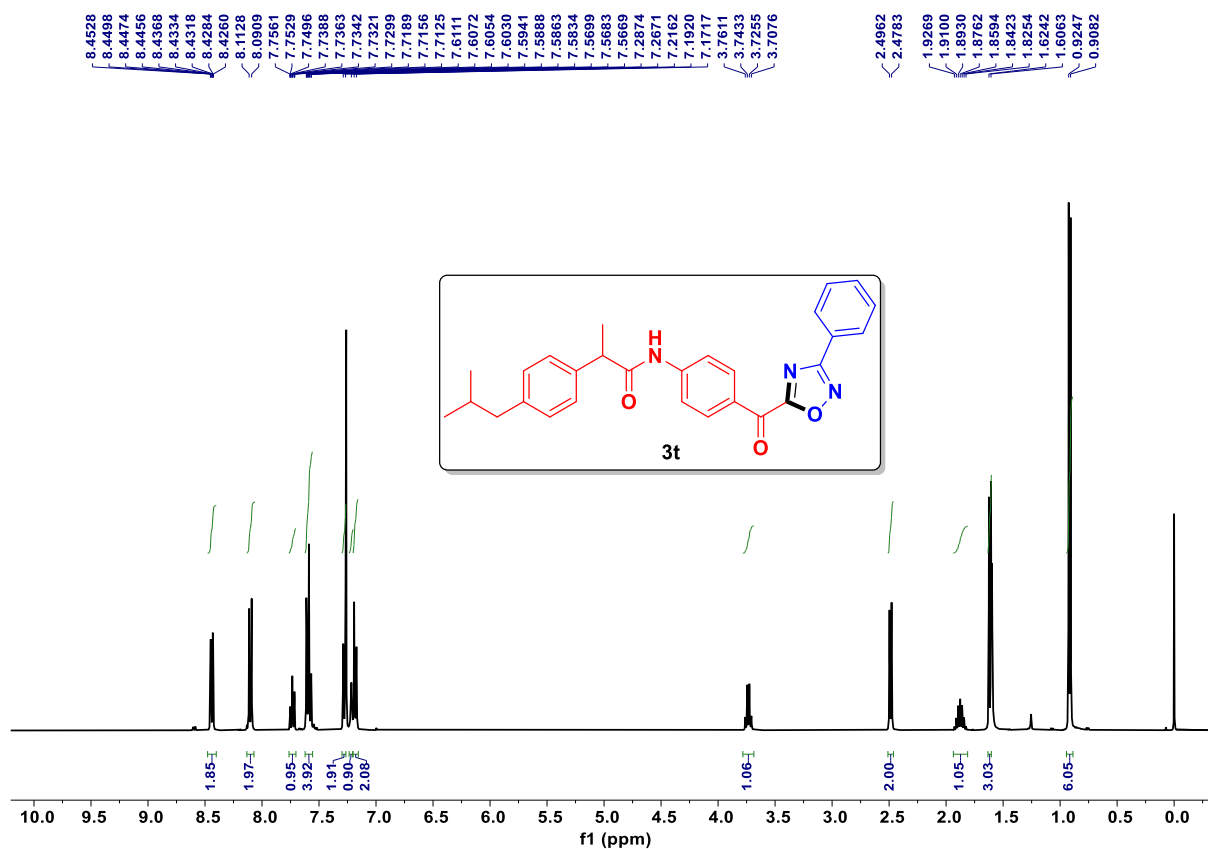

Figure 47. <sup>1</sup>H NMR (400 MHz, CDCl<sub>3</sub>) of compound 3t

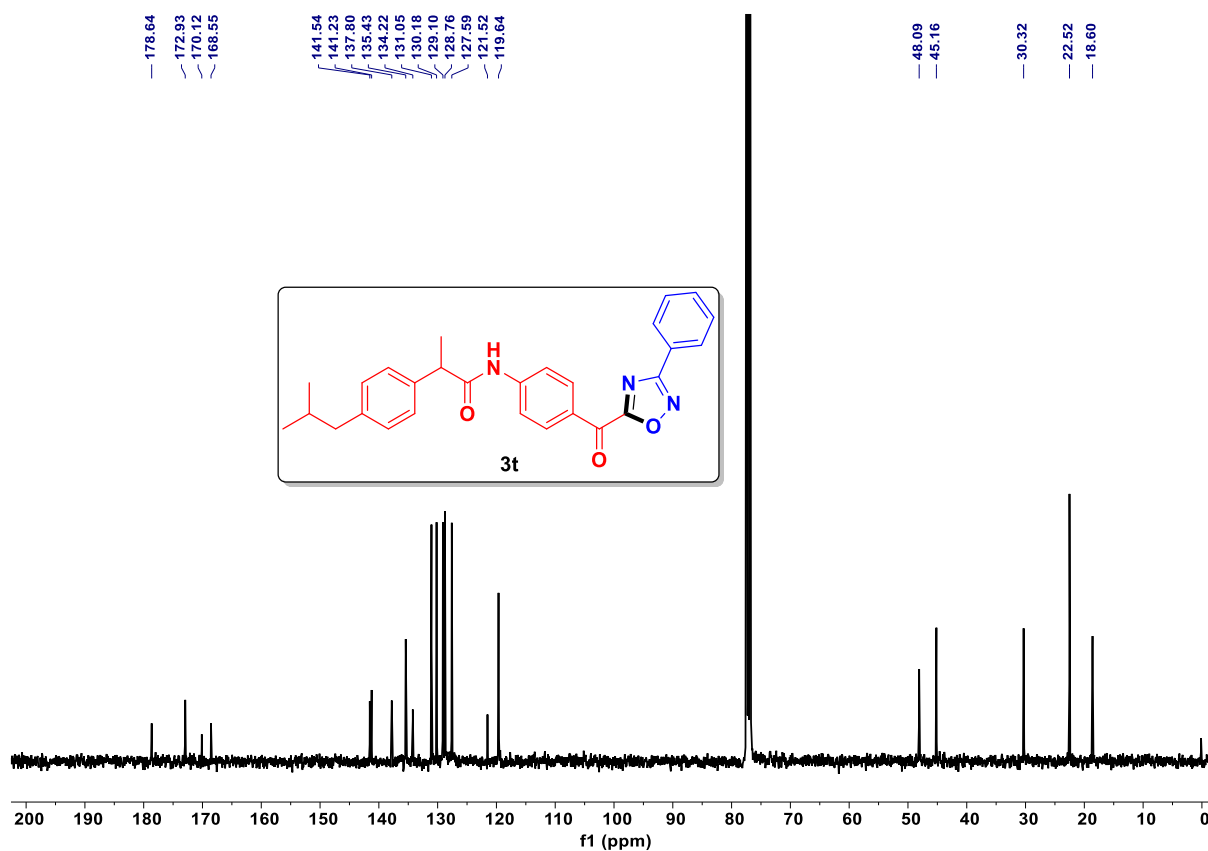

Figure 48. <sup>13</sup>C {<sup>1</sup>H} NMR (100 MHz, CDCl<sub>3</sub>) of compound 3t

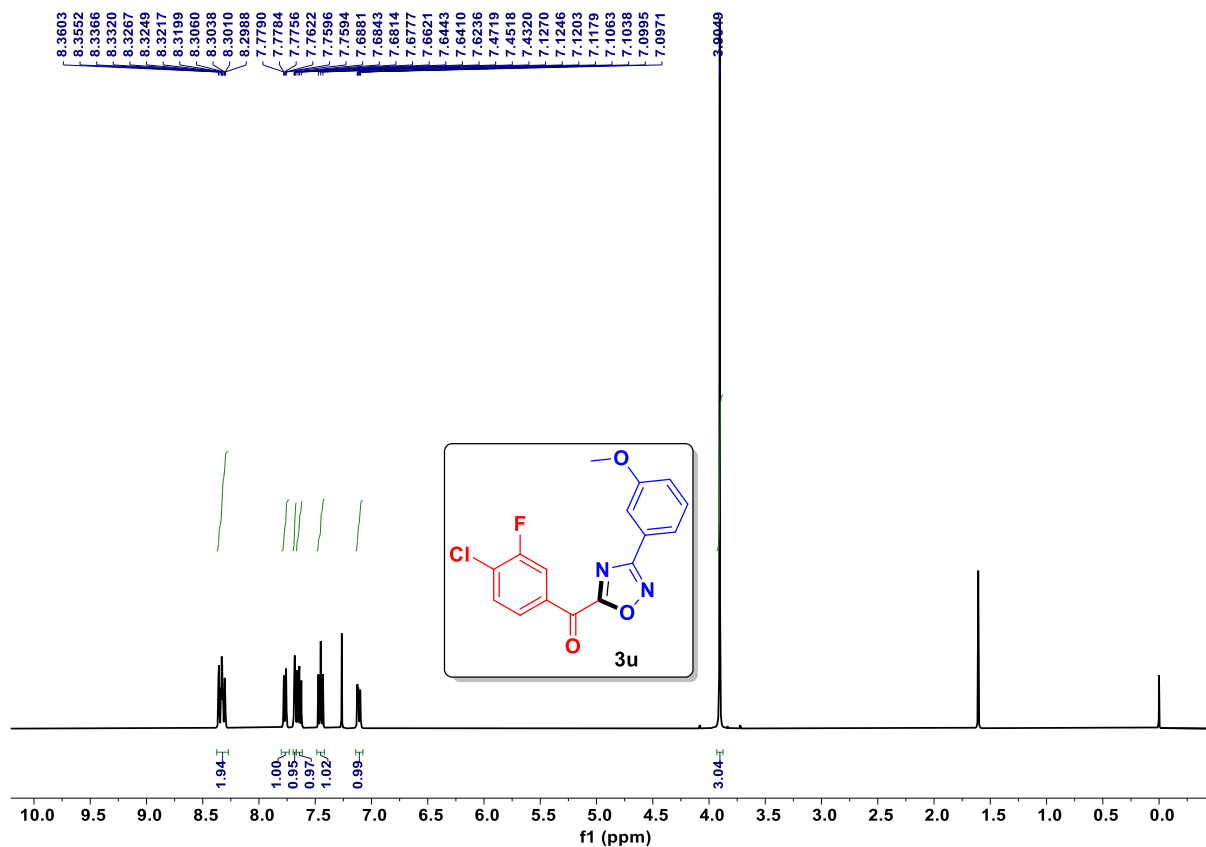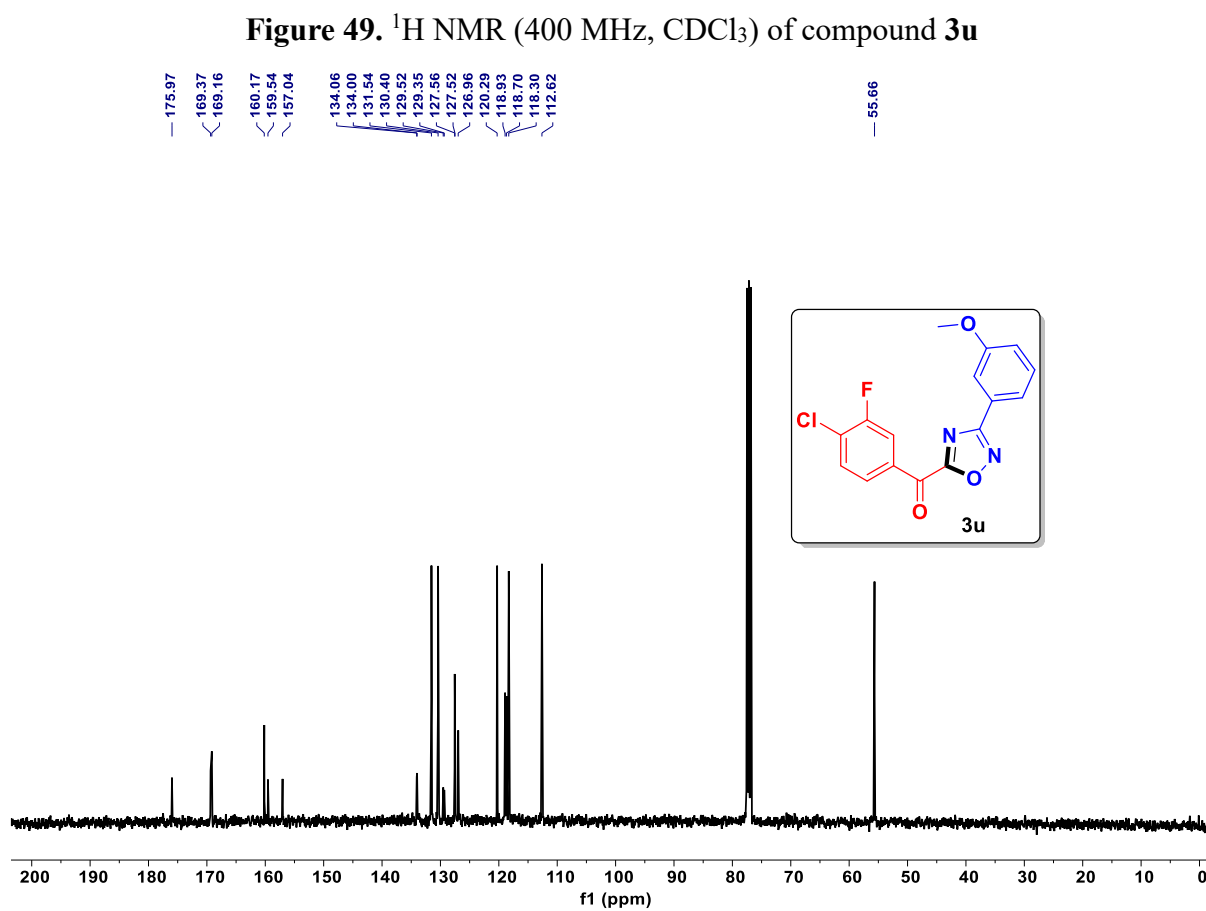

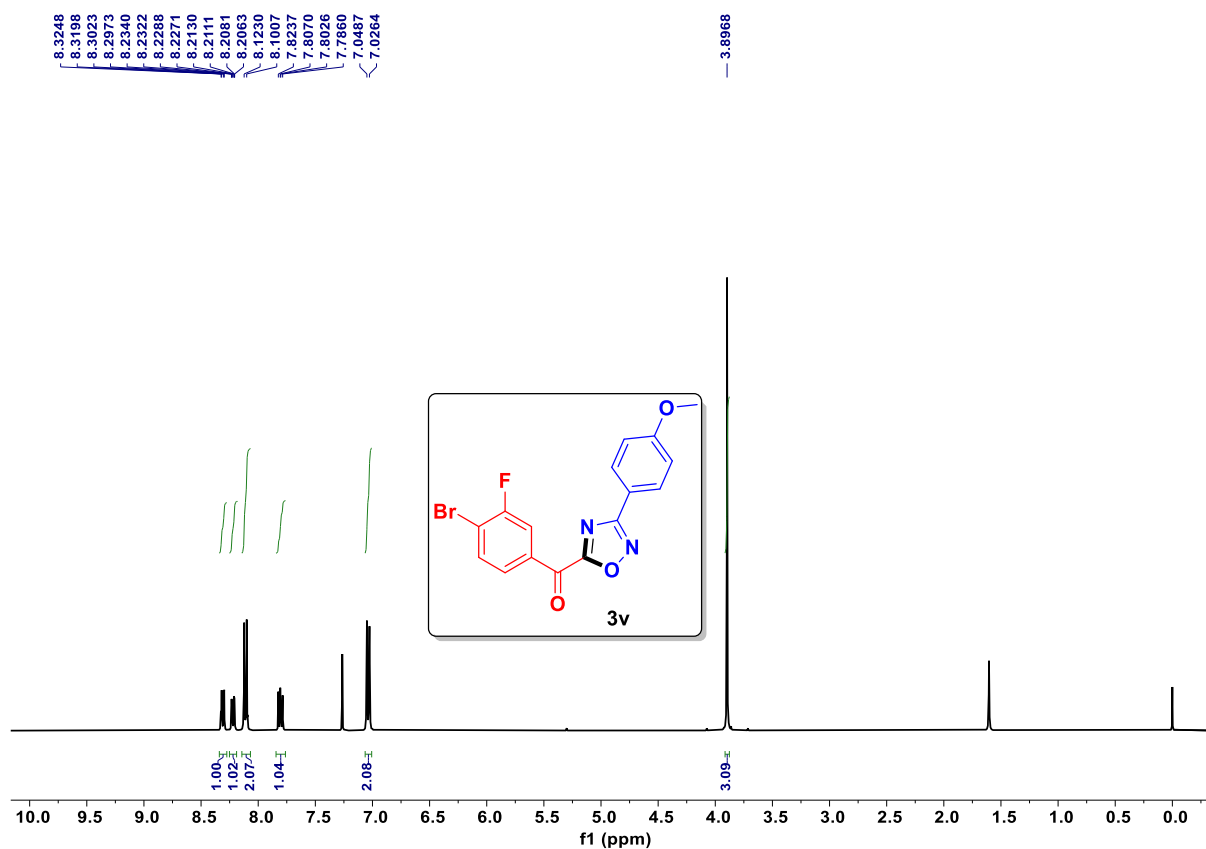

Figure 51. <sup>1</sup>H NMR (400 MHz, CDCl<sub>3</sub>) of compound 3v

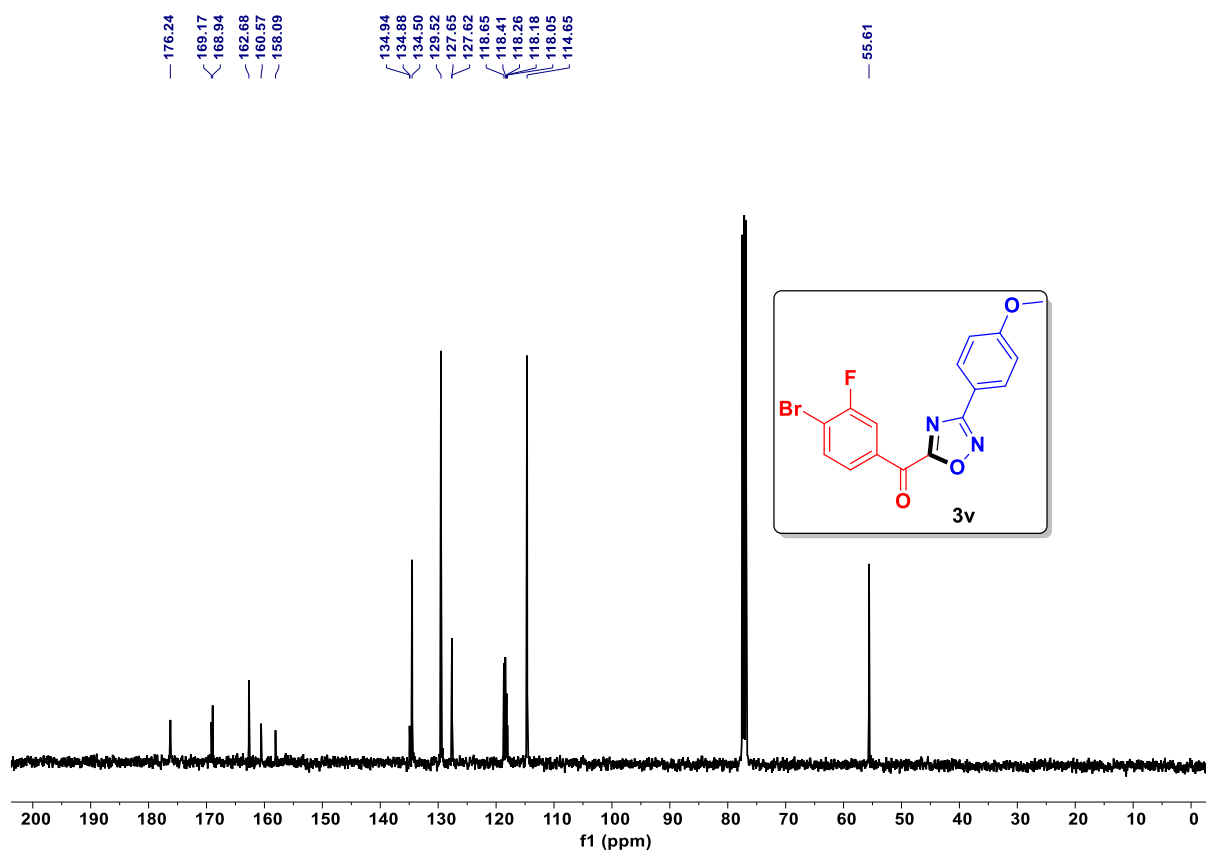

Figure 52. <sup>13</sup>C{<sup>1</sup>H} NMR (100 MHz, CDCl<sub>3</sub>) of compound 3v



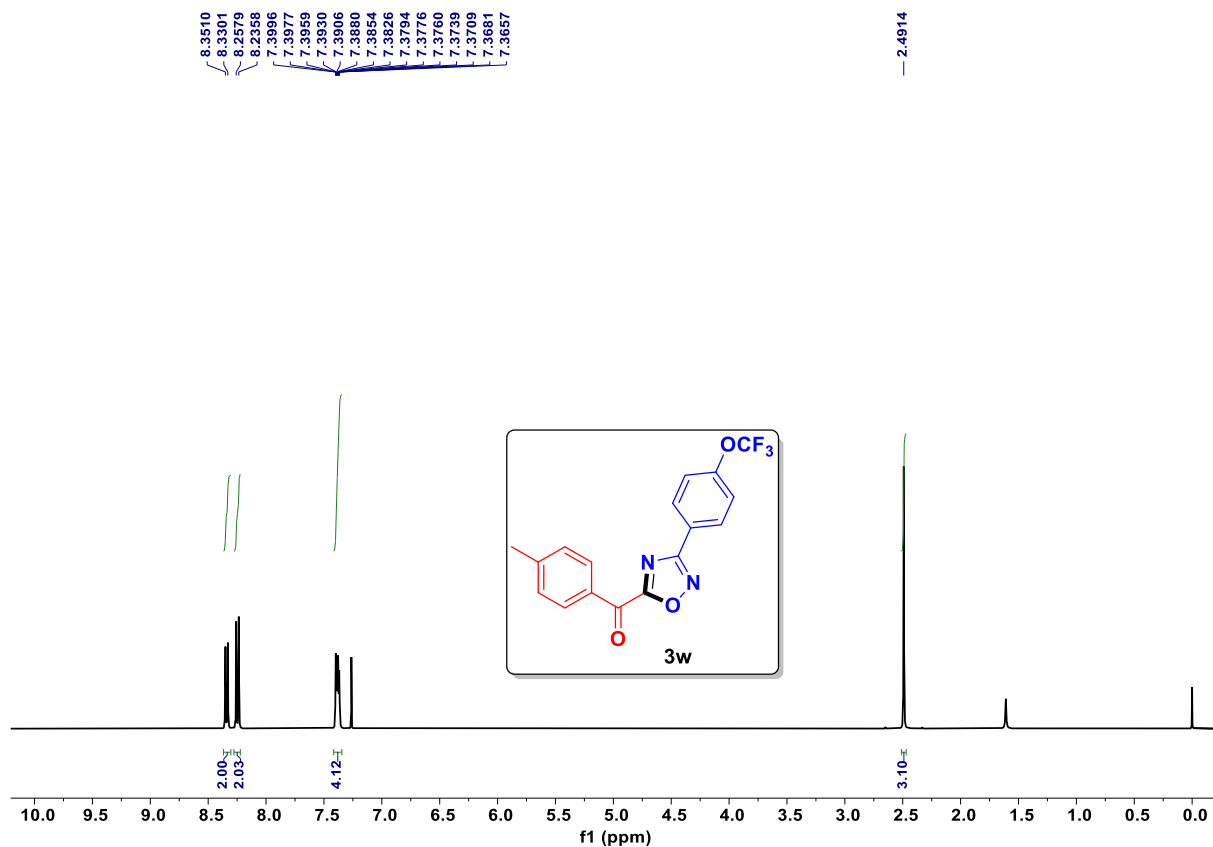

Figure 53.  $^1\text{H}$  NMR (400 MHz,  $\text{CDCl}_3$ ) of compound **3w**

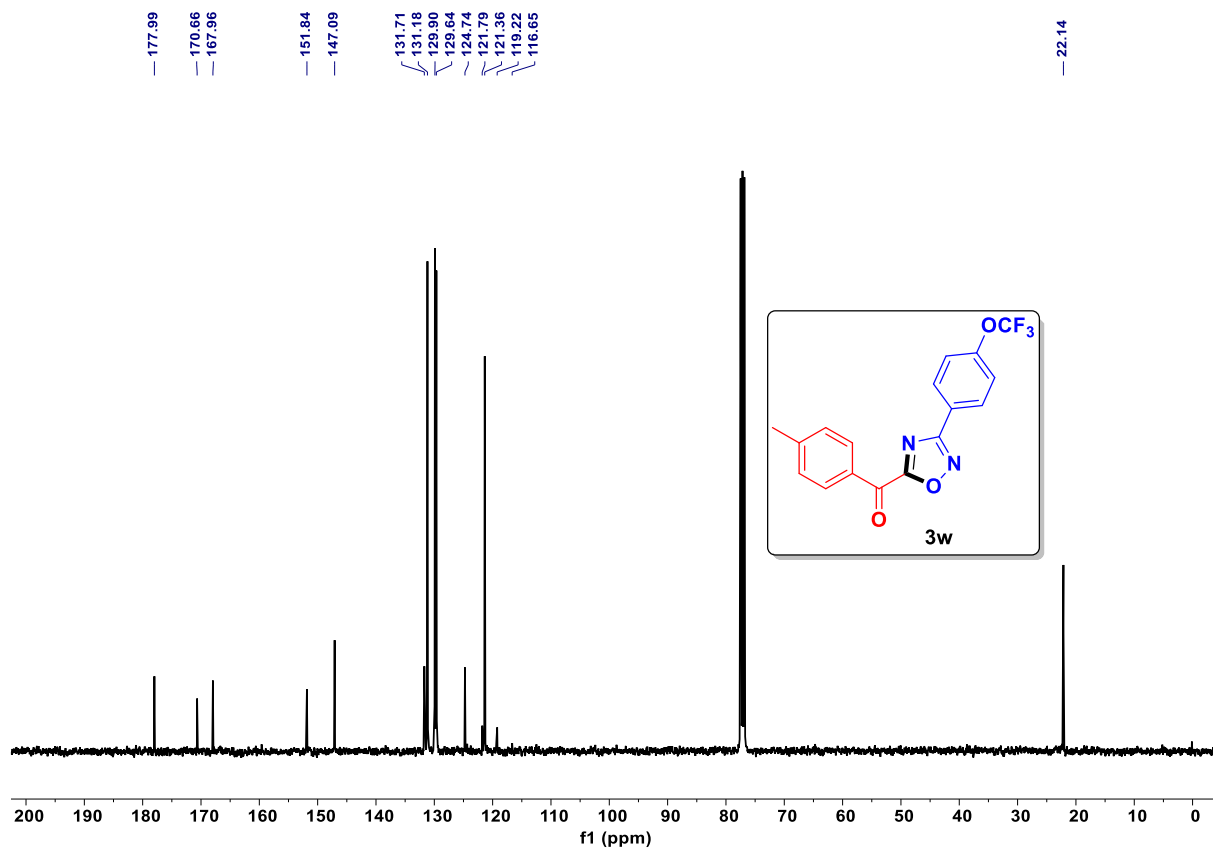

Figure 54.  $^{13}\text{C}$  NMR (100 MHz,  $\text{CDCl}_3$ ) of compound **3w**

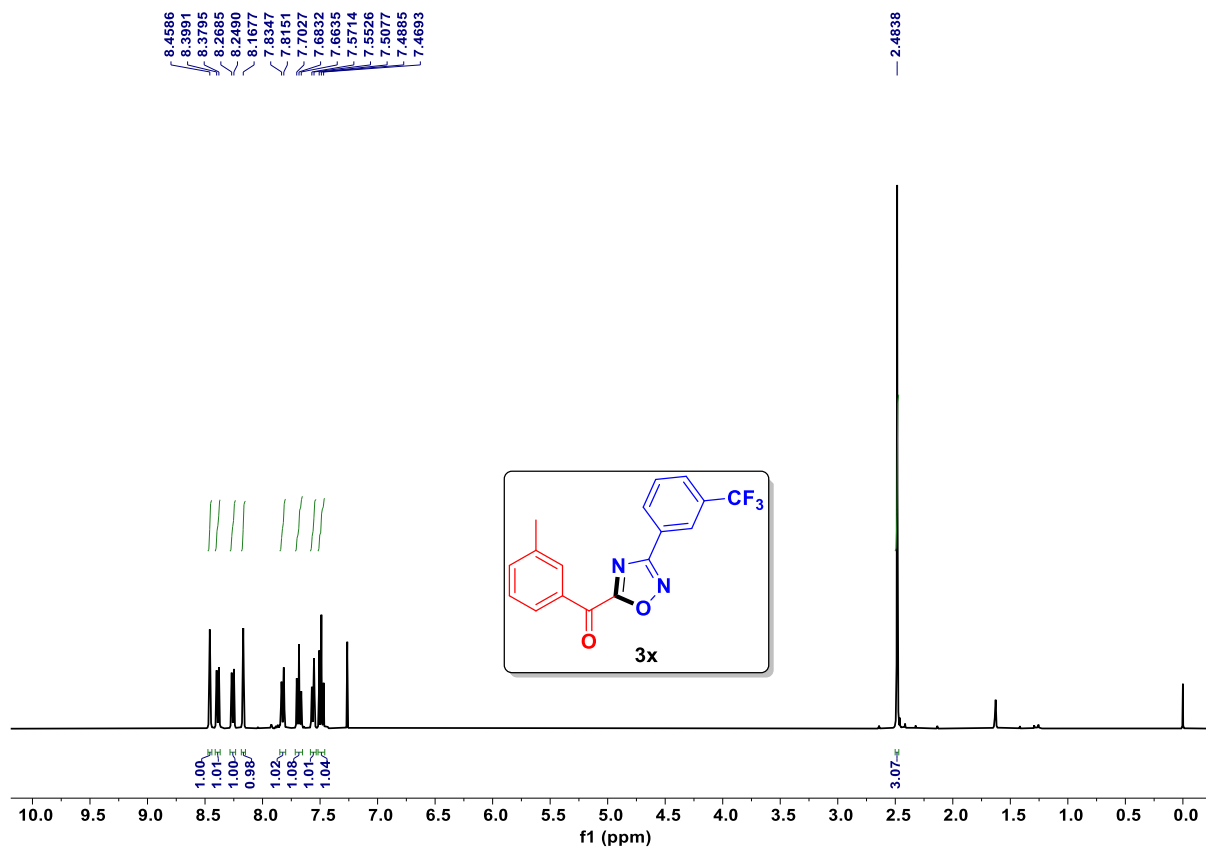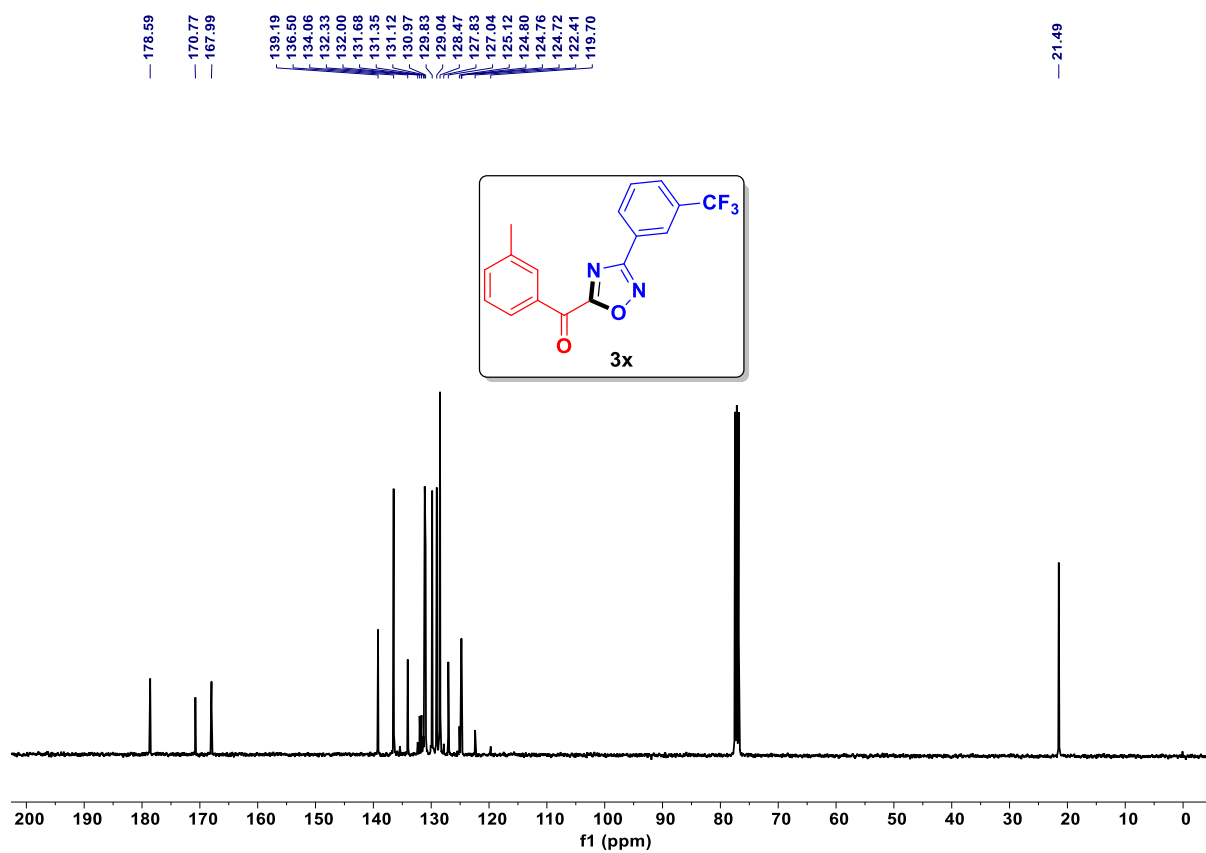

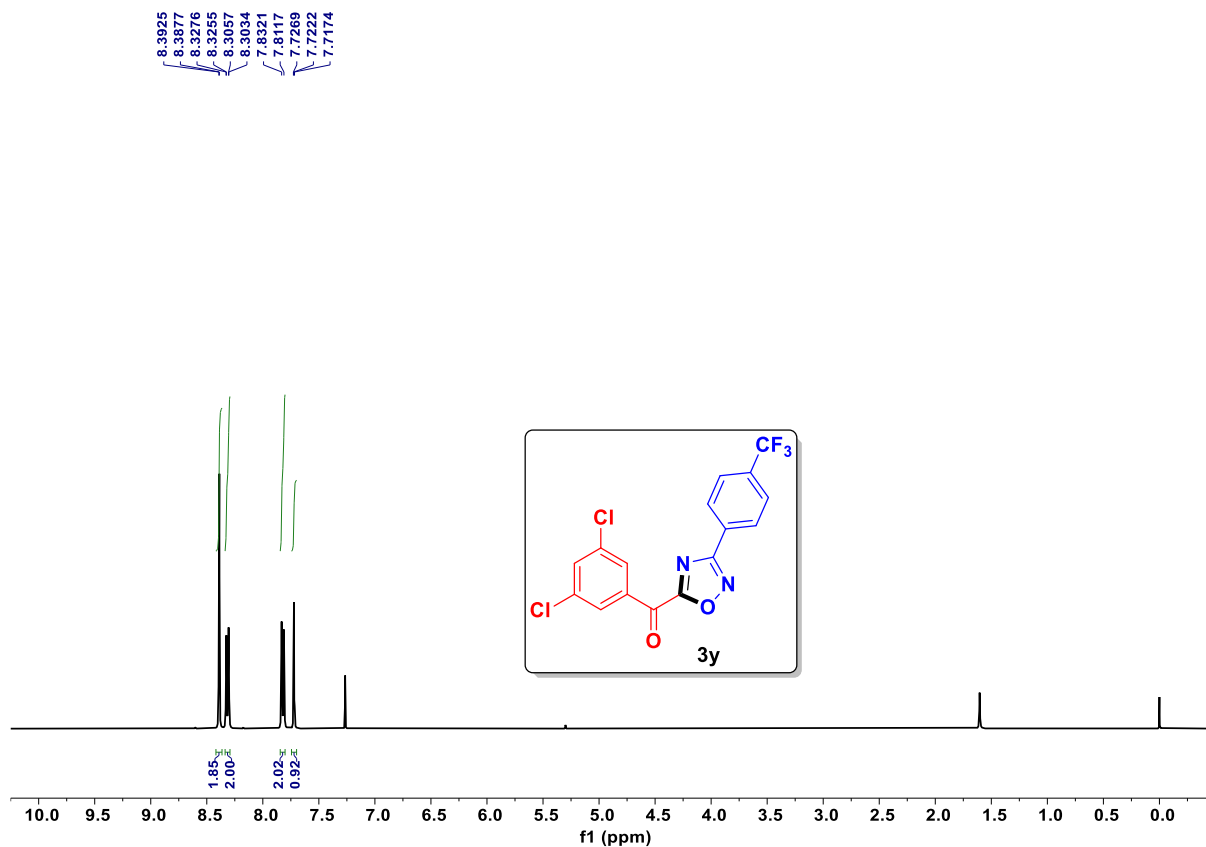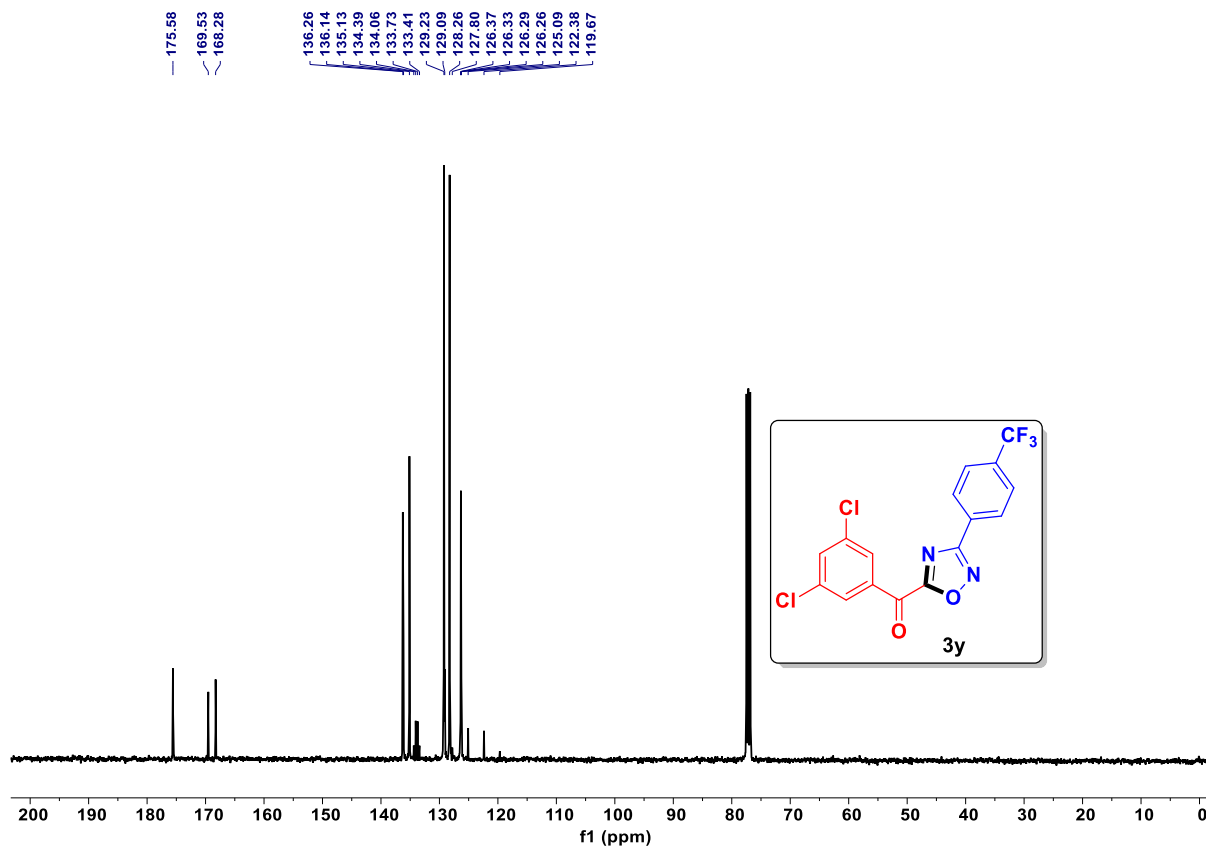

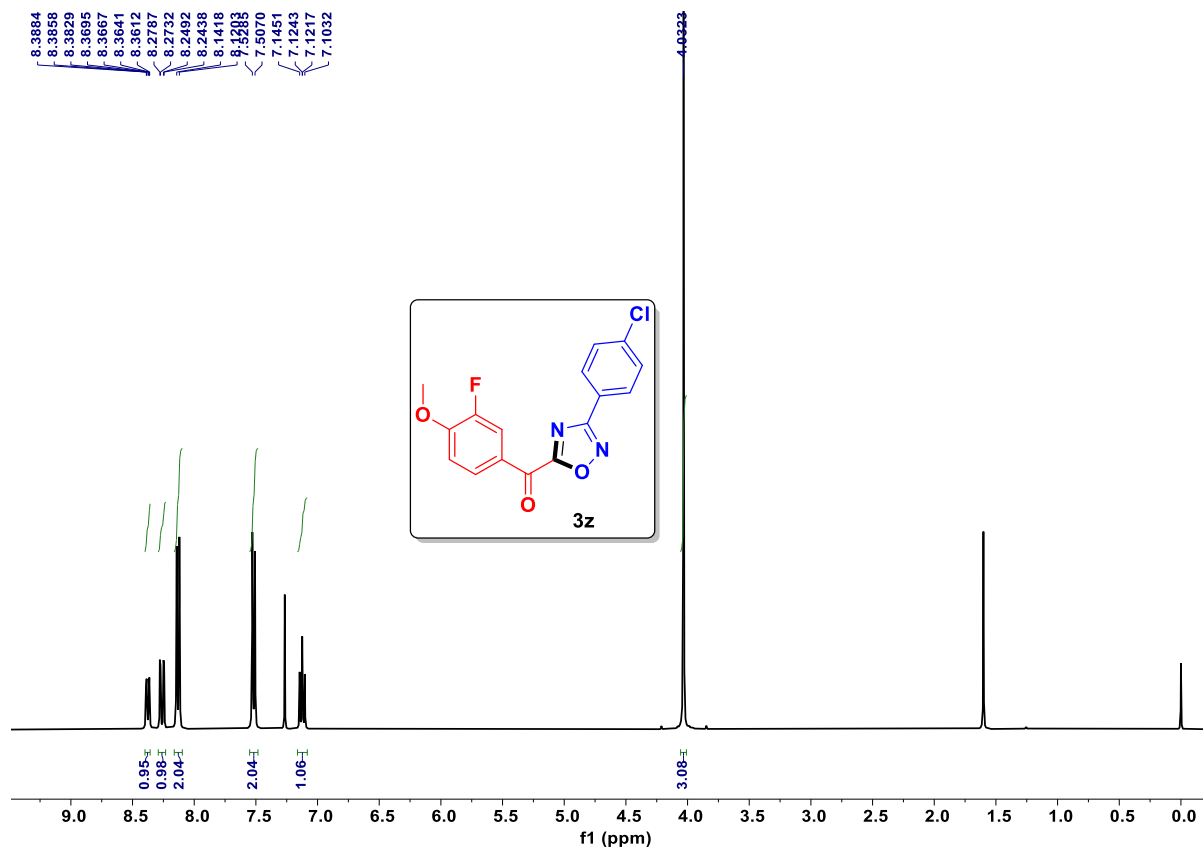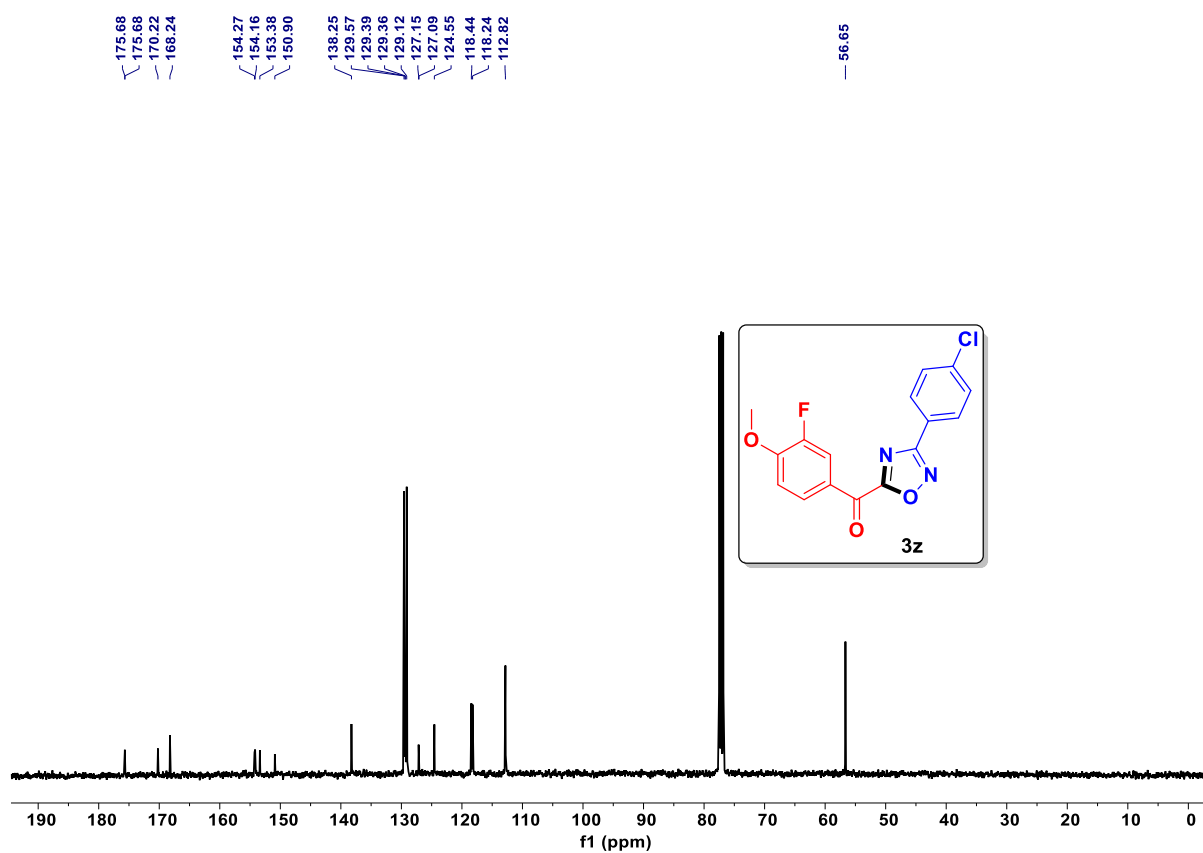

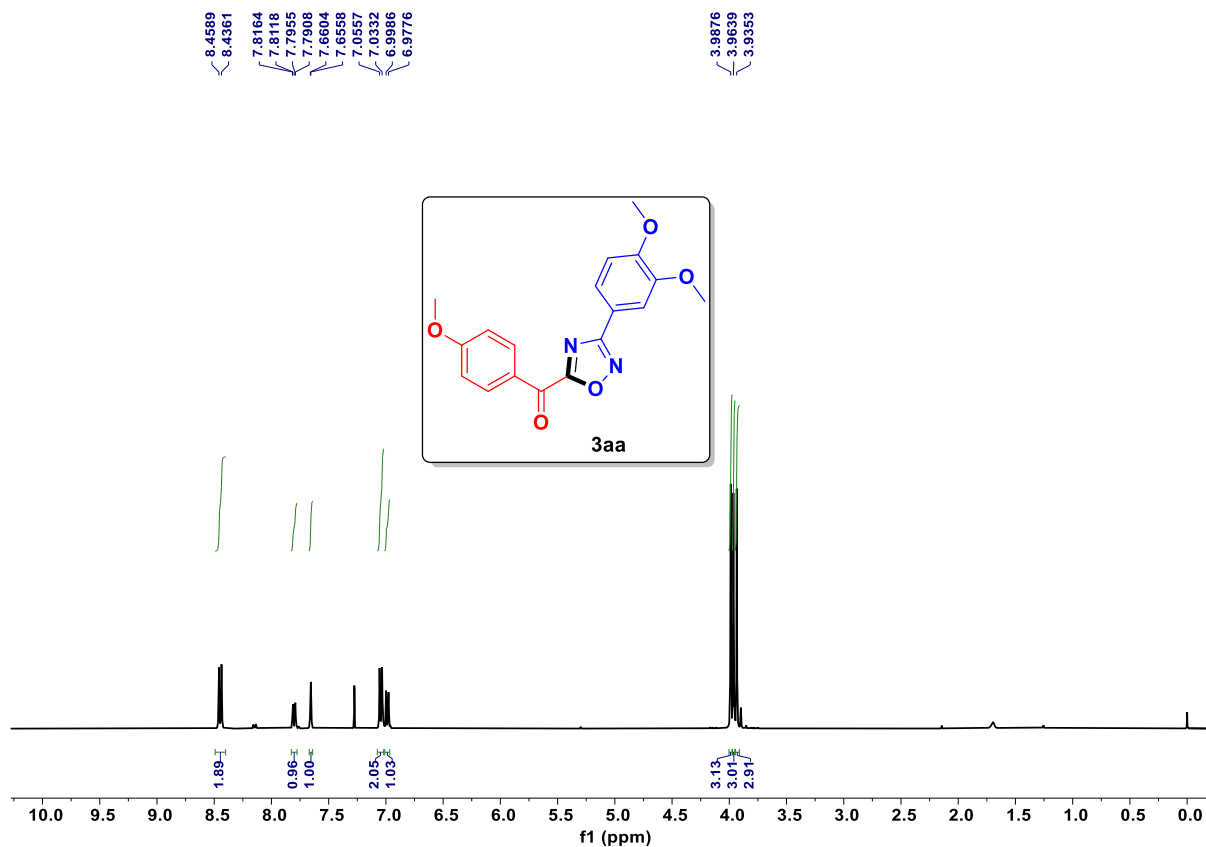

Figure 61.  $^1\text{H}$  NMR (400 MHz,  $\text{CDCl}_3$ ) of compound 3aa

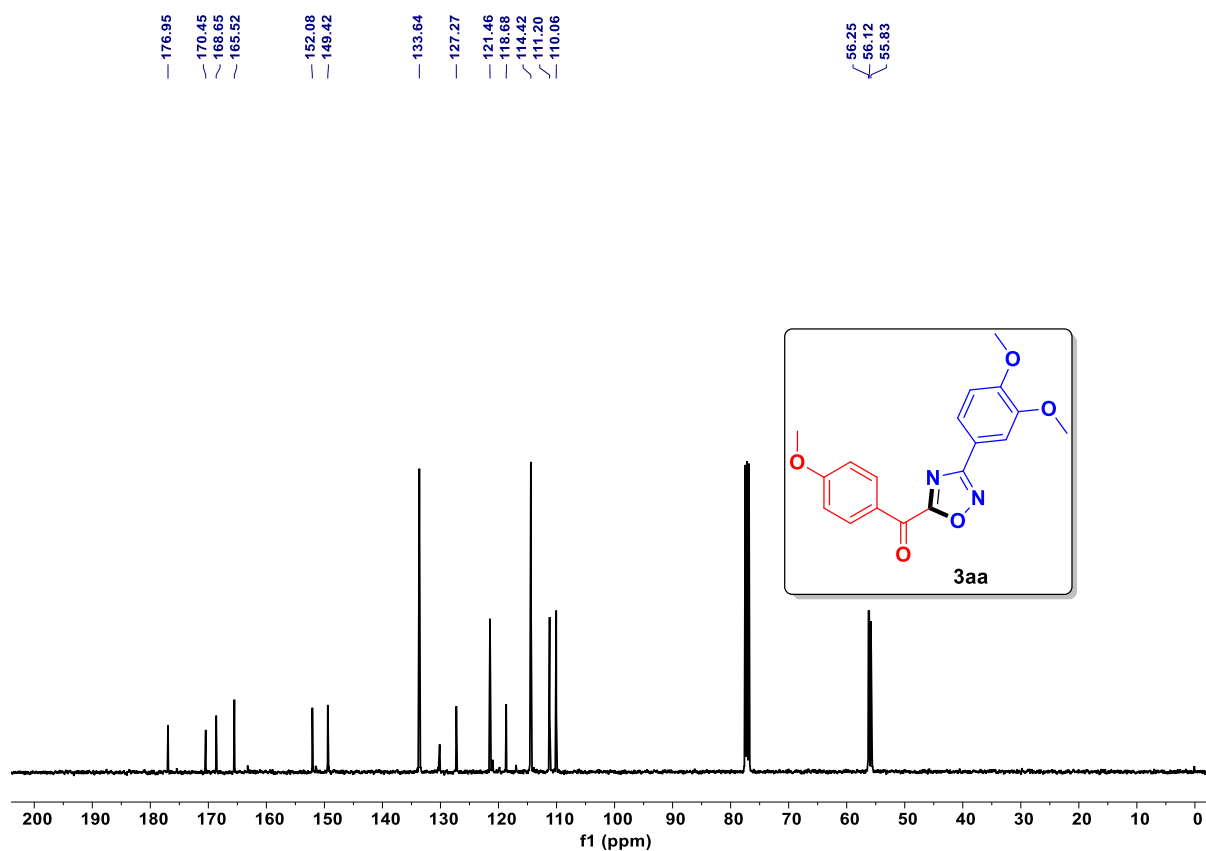

Figure 61.  $^{13}\text{C}\{^1\text{H}\}$  NMR (100 MHz,  $\text{CDCl}_3$ ) of compound 3aa

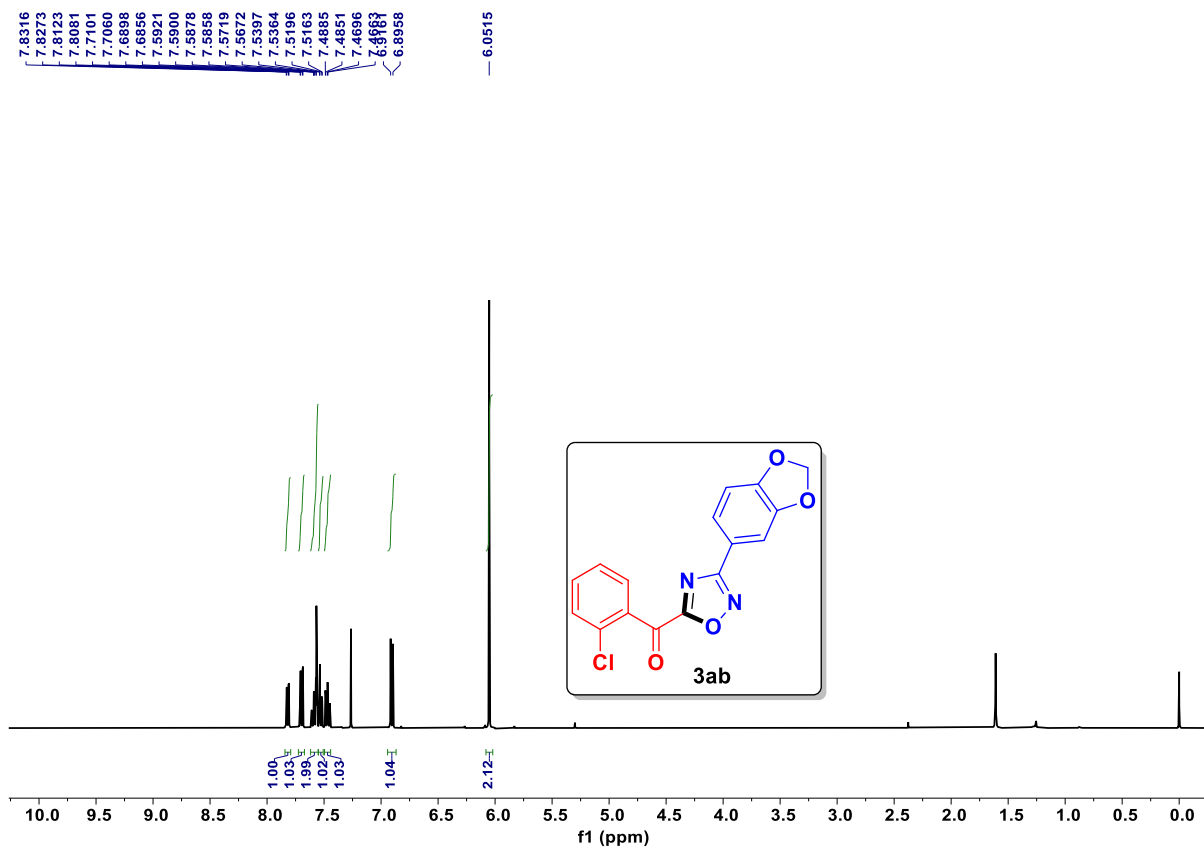

Figure 63.  $^1\text{H}$  NMR (400 MHz,  $\text{CDCl}_3$ ) of compound 3ab

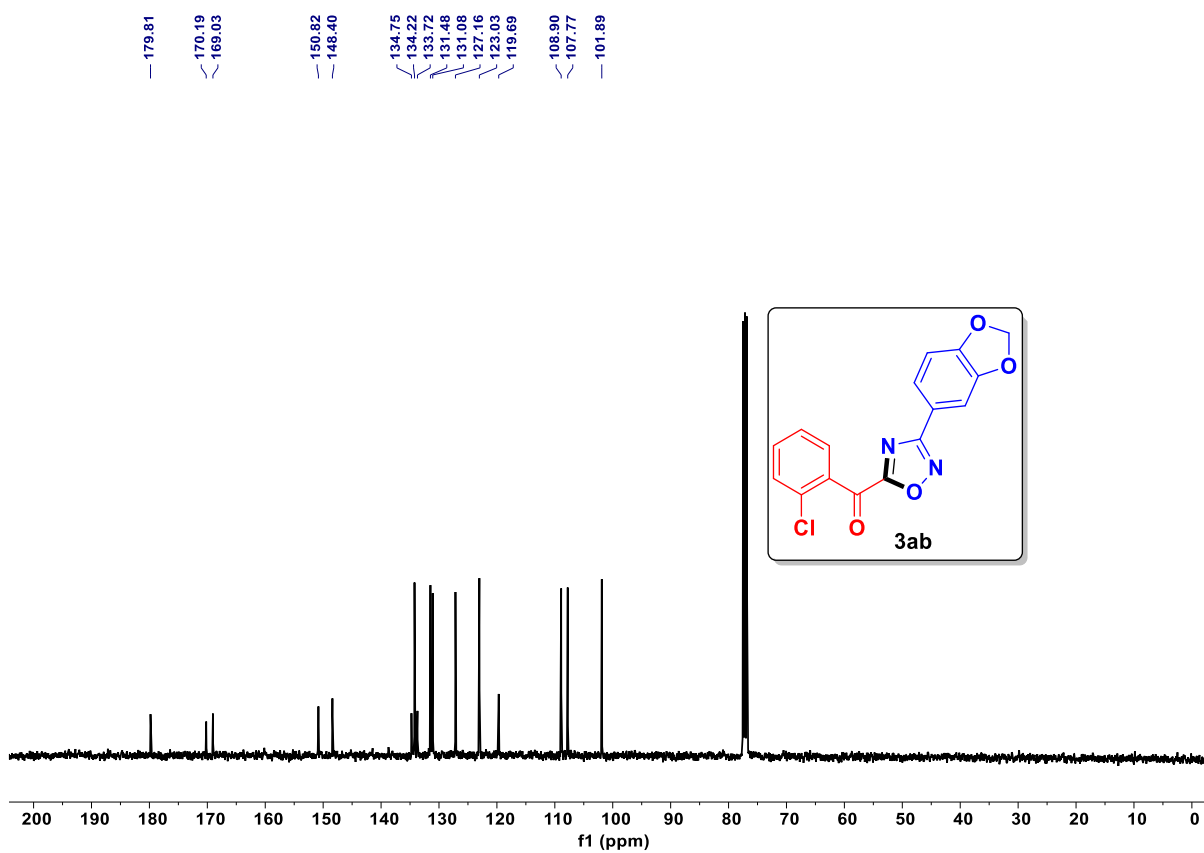

Figure 64.  $^{13}\text{C}\{^1\text{H}\}$  NMR (100 MHz,  $\text{CDCl}_3$ ) of compound 3ab

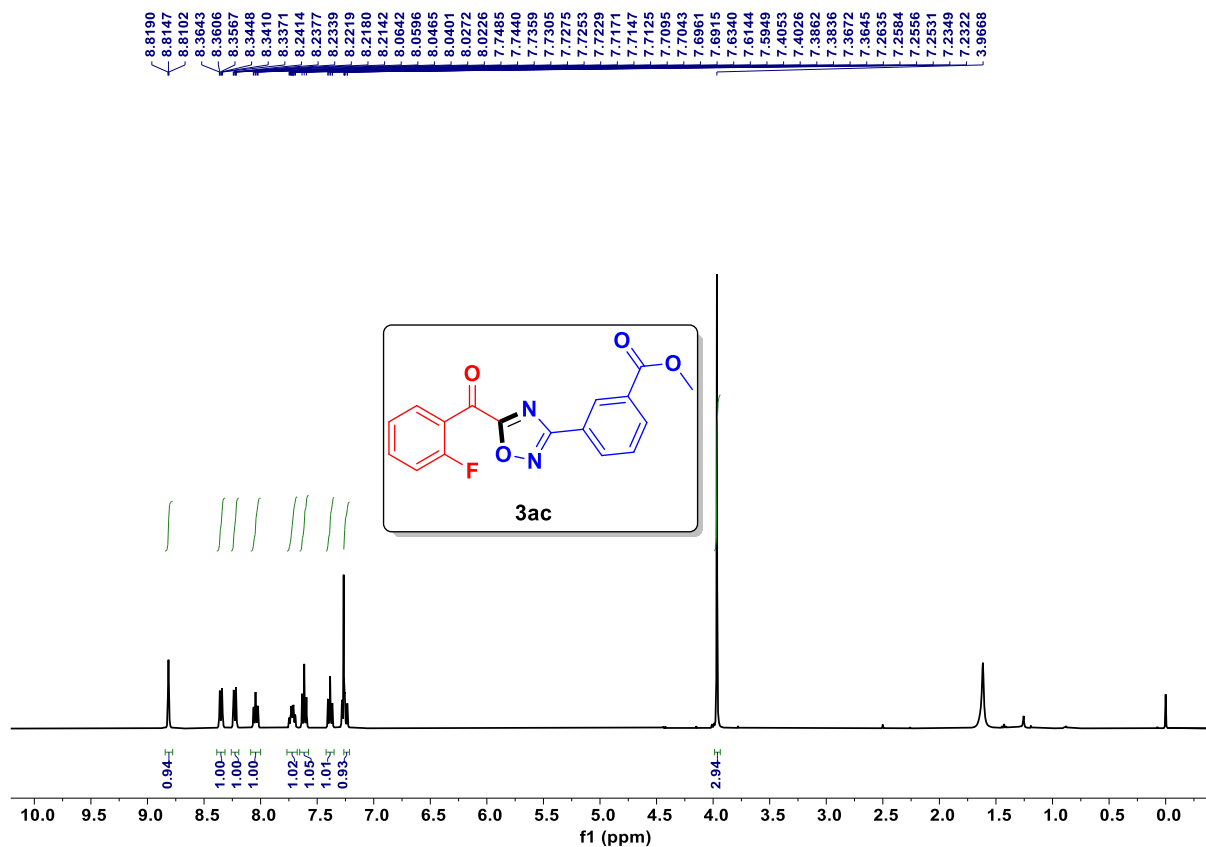

Figure 85.  $^1\text{H}$  NMR (400 MHz,  $\text{CDCl}_3$ ) of compound 3ac

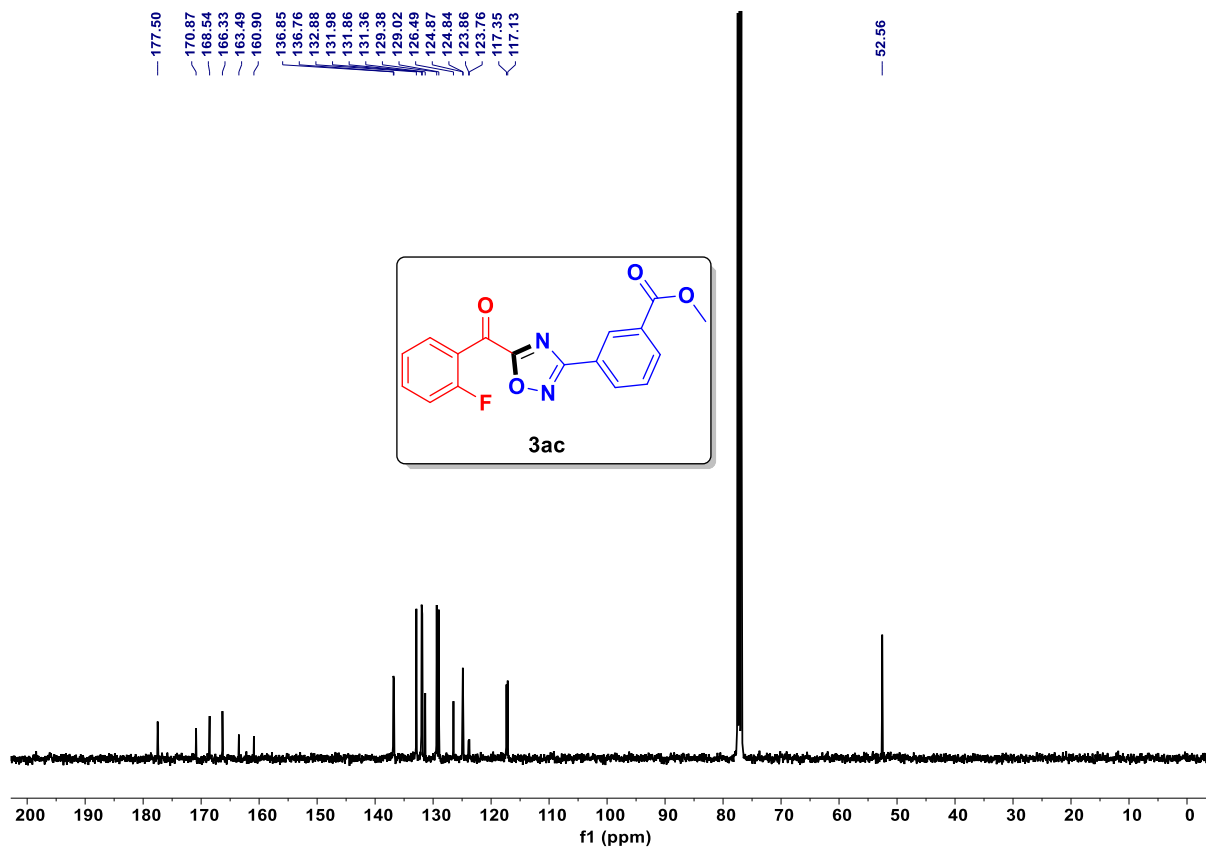

Figure 86.  $^{13}\text{C}\{^1\text{H}\}$  NMR (100 MHz,  $\text{CDCl}_3$ ) of compound 3ac

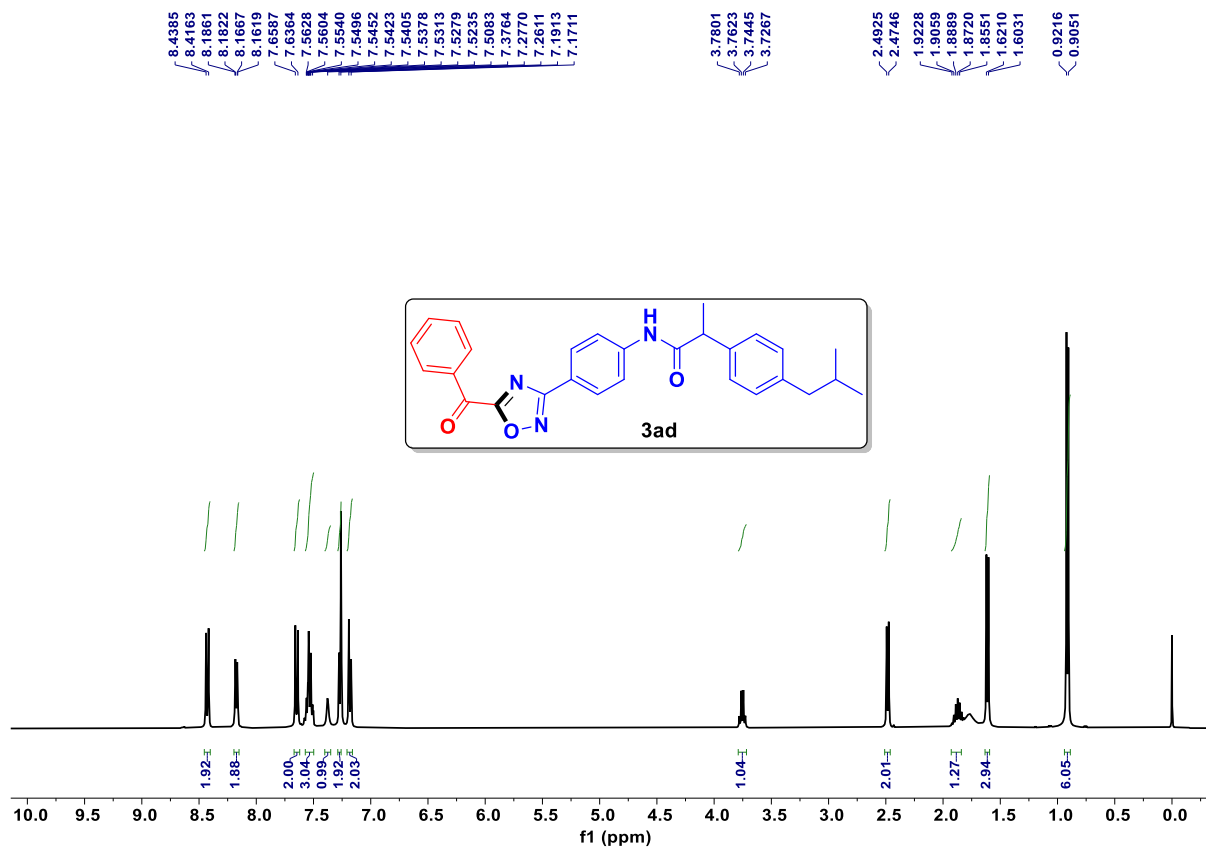

Figure 67.  $^1\text{H}$  NMR (400 MHz,  $\text{CDCl}_3$ ) of compound 3ad

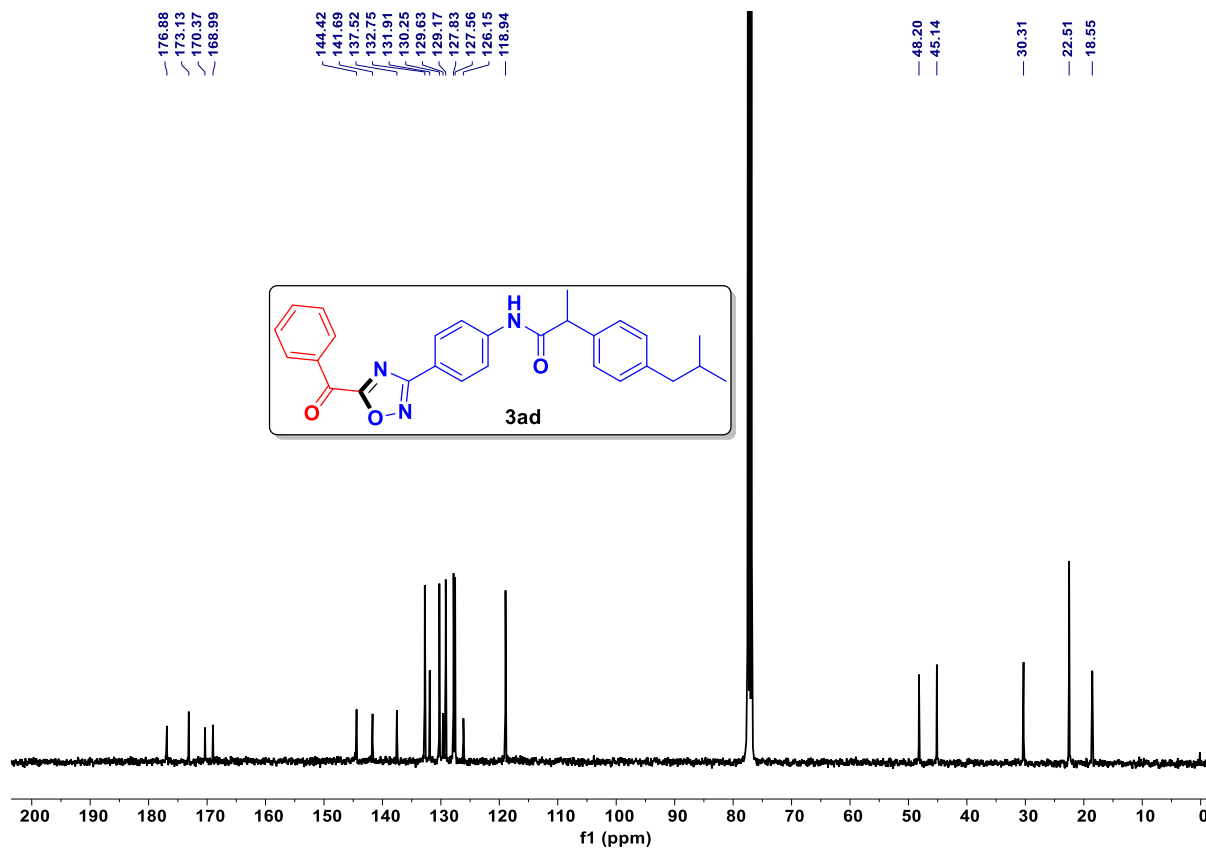

Figure 68.  $^{13}\text{C}\{^1\text{H}\}$  NMR (100 MHz,  $\text{CDCl}_3$ ) of compound 3ad



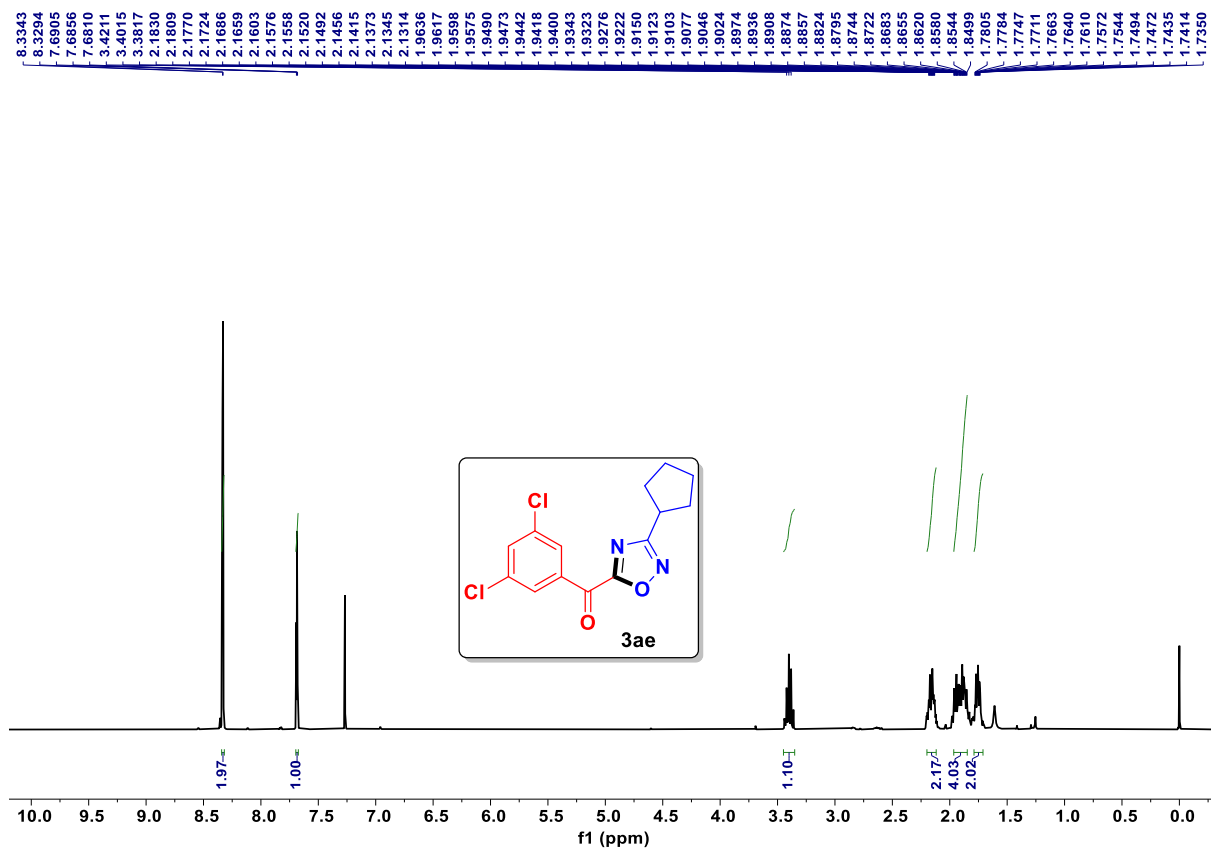

Figure 69.  $^1\text{H}$  NMR (400 MHz,  $\text{CDCl}_3$ ) of compound 3ae

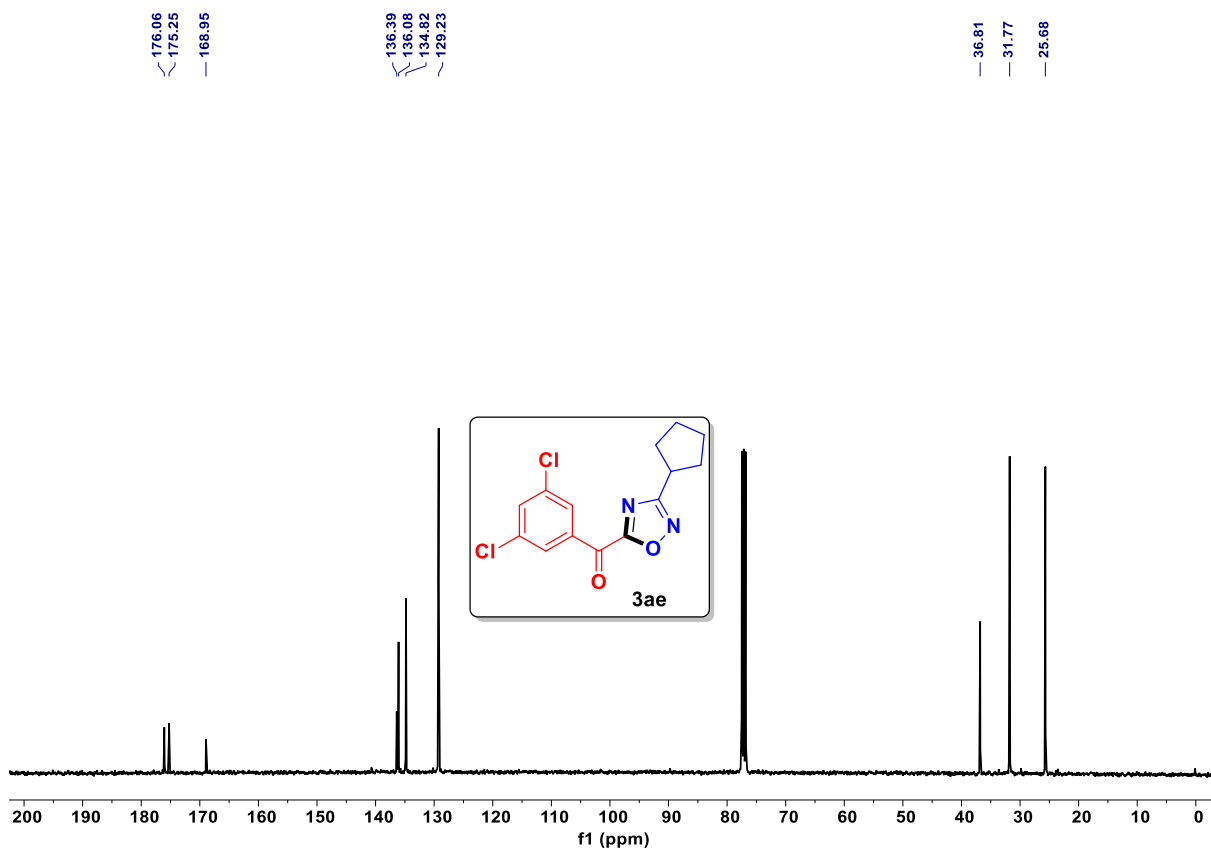

Figure 70.  $^{13}\text{C}\{^1\text{H}\}$  NMR (100 MHz,  $\text{CDCl}_3$ ) of compound 3ae

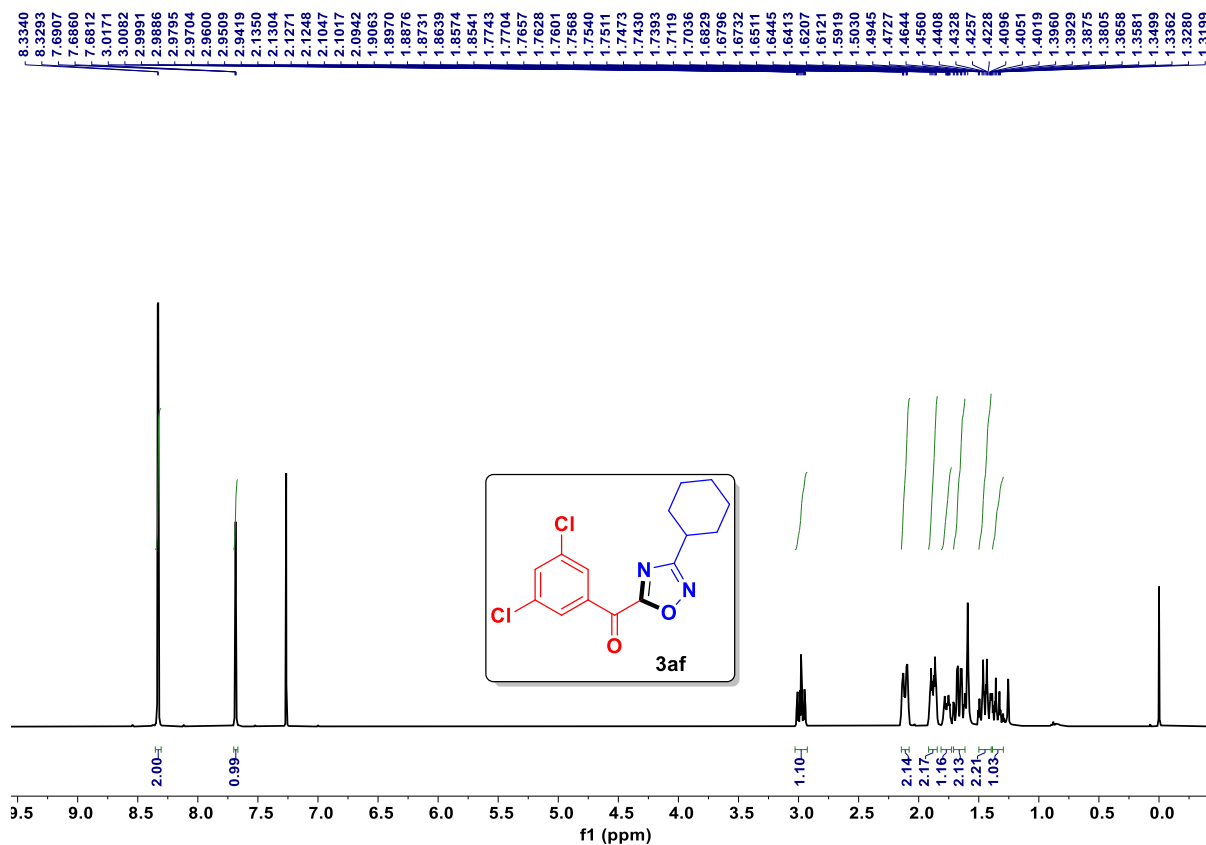

Figure 71.  $^1\text{H}$  NMR (400 MHz,  $\text{CDCl}_3$ ) of compound 3af

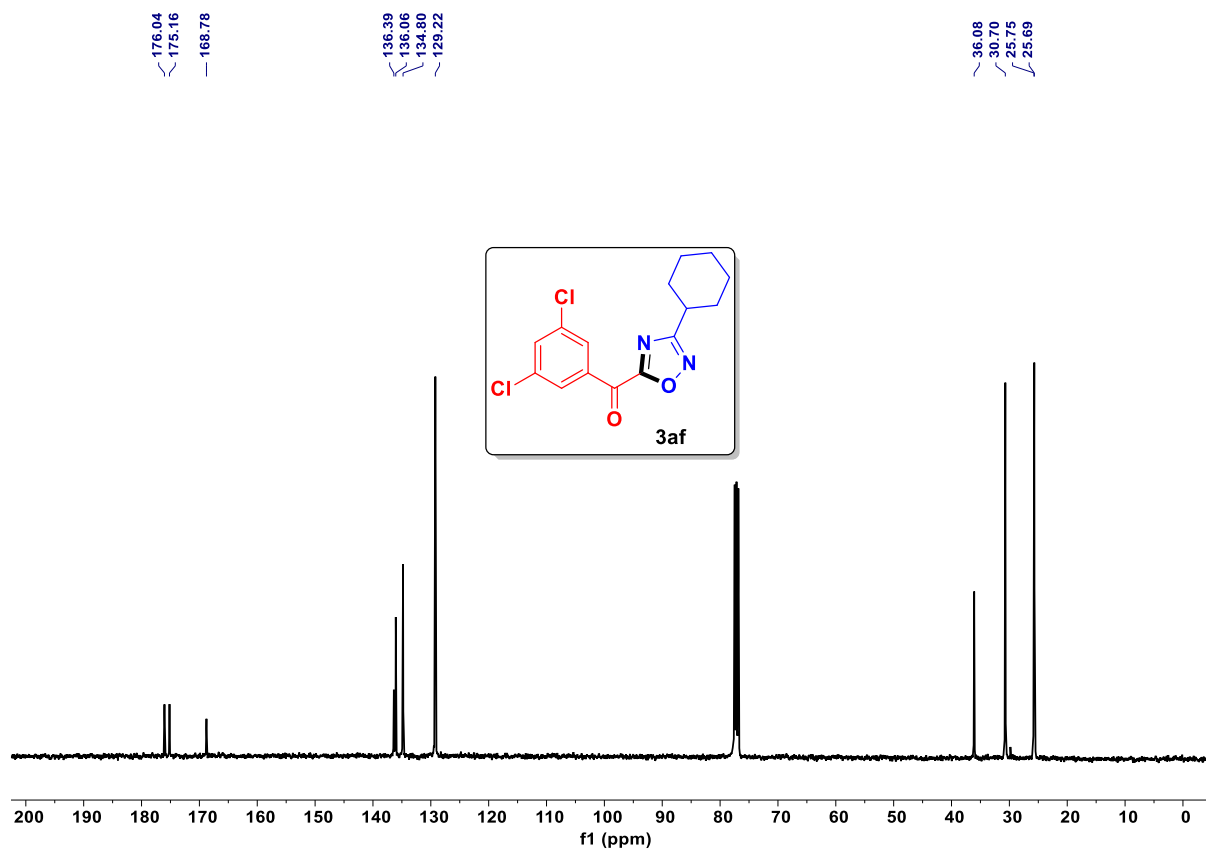

Figure 72.  $^{13}\text{C}\{^1\text{H}\}$  NMR (100 MHz,  $\text{CDCl}_3$ ) of compound 3af

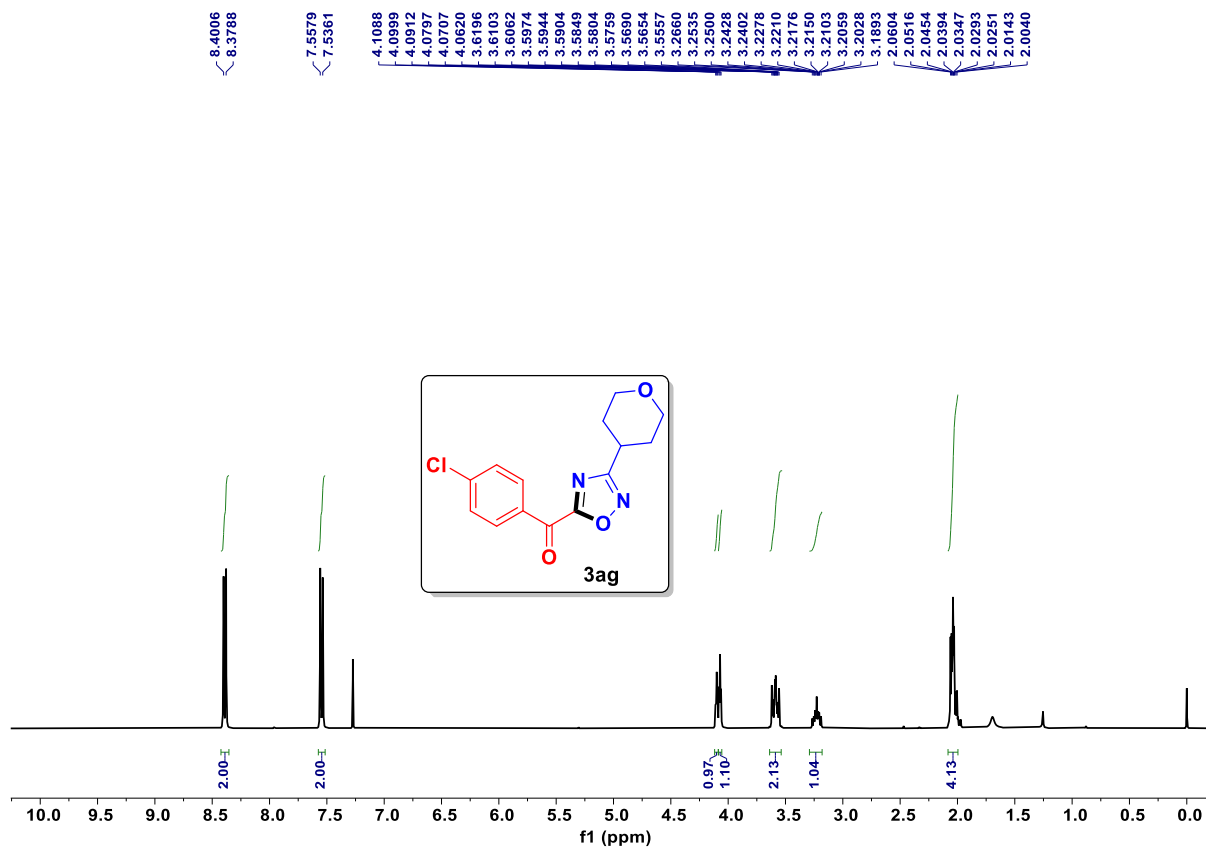

Figure 73.  $^1\text{H}$  NMR (400 MHz,  $\text{CDCl}_3$ ) of compound **3ag**

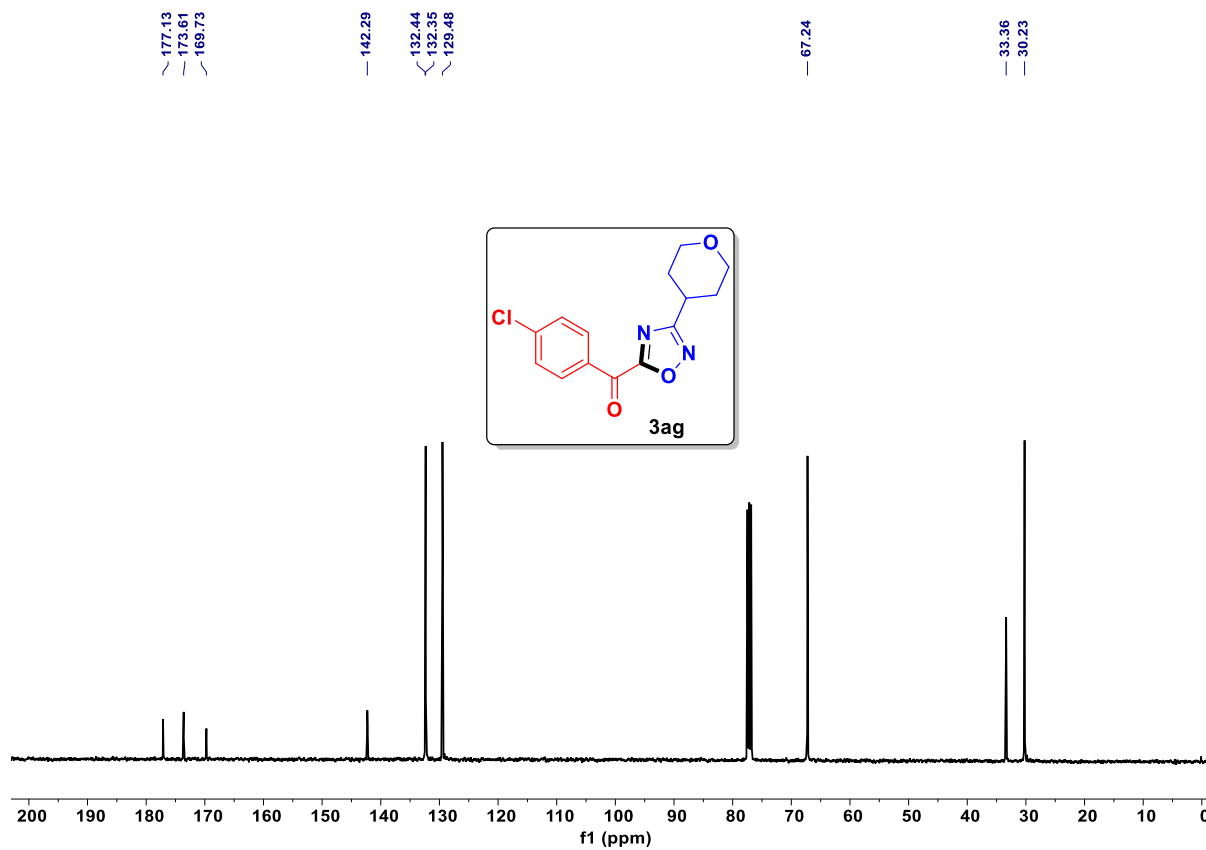

Figure 74.  $^{13}\text{C}\{^1\text{H}\}$  NMR (100 MHz,  $\text{CDCl}_3$ ) of compound **3ag**

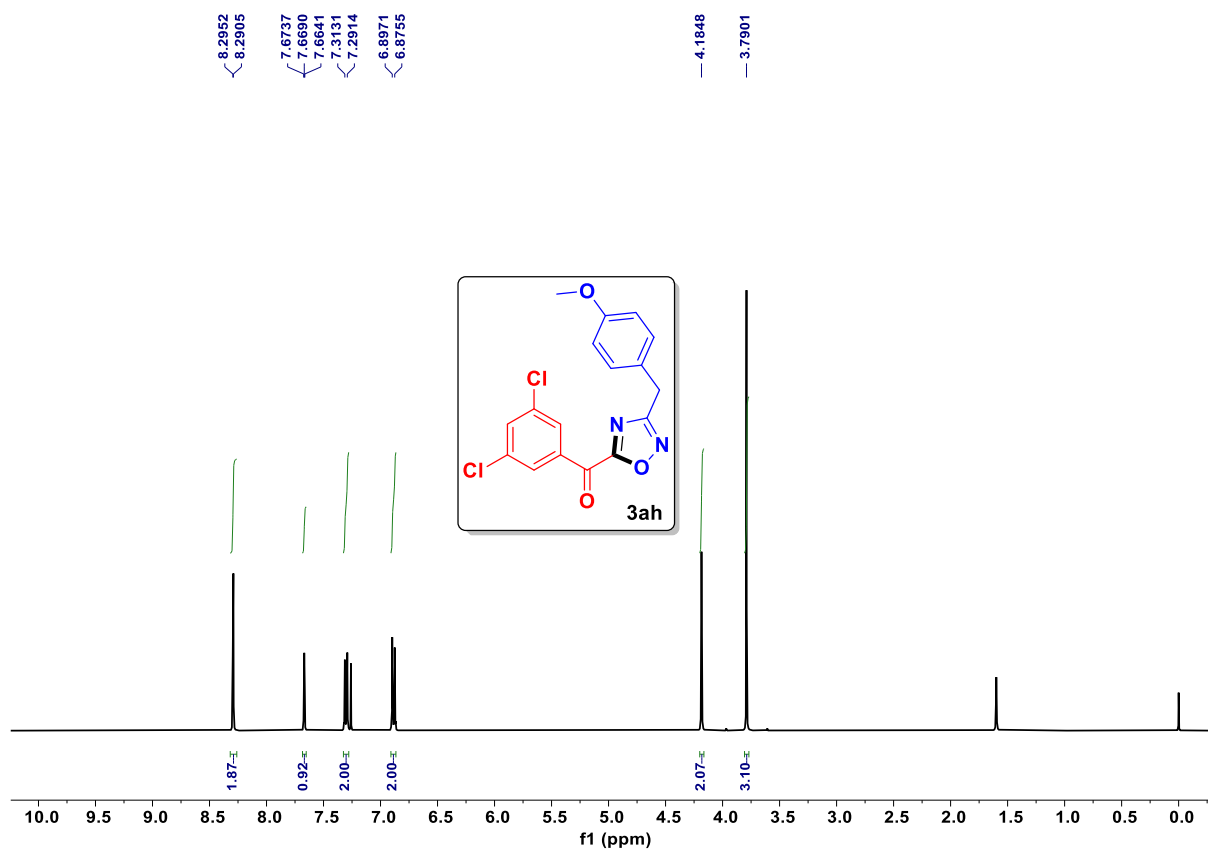

Figure 75.  $^1\text{H}$  NMR (400 MHz,  $\text{CDCl}_3$ ) of compound 3ah

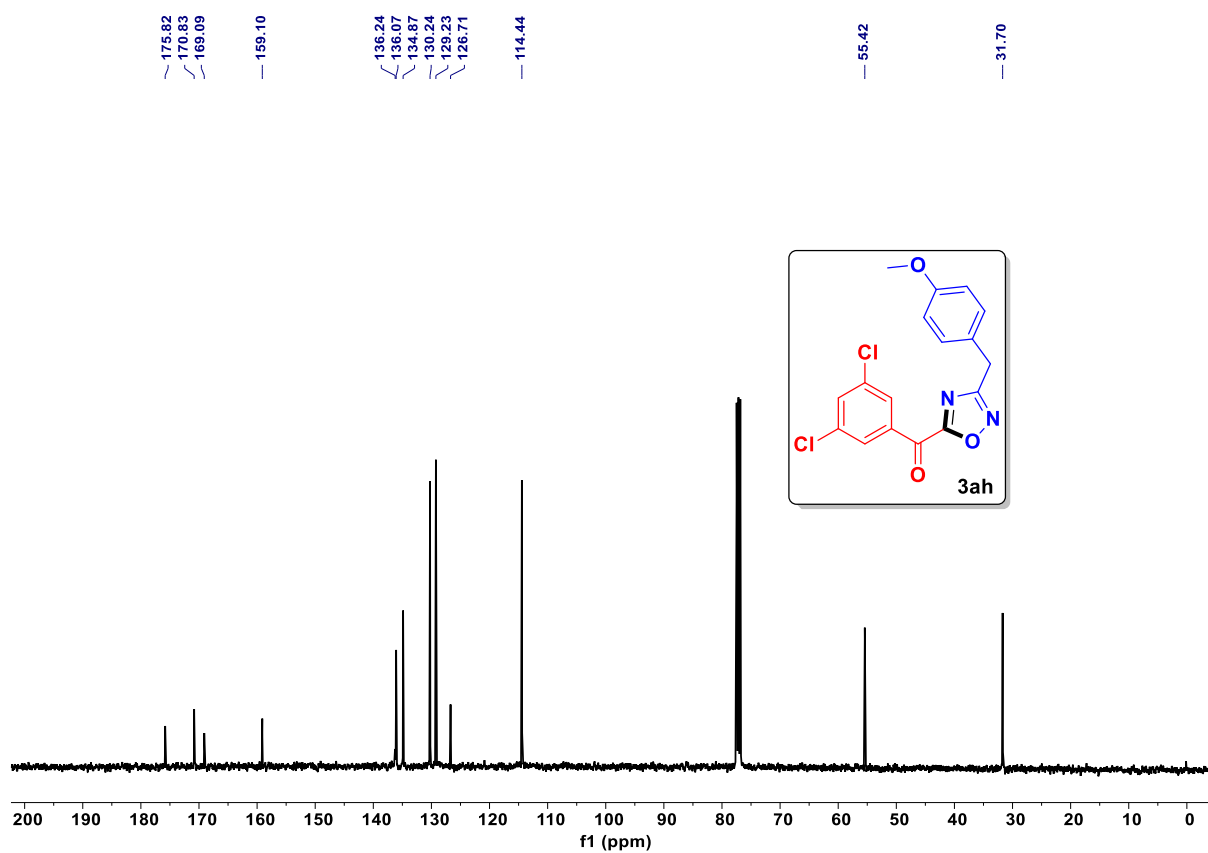

Figure 76.  $^{13}\text{C}\{^1\text{H}\}$  NMR (100 MHz,  $\text{CDCl}_3$ ) of compound 3ah

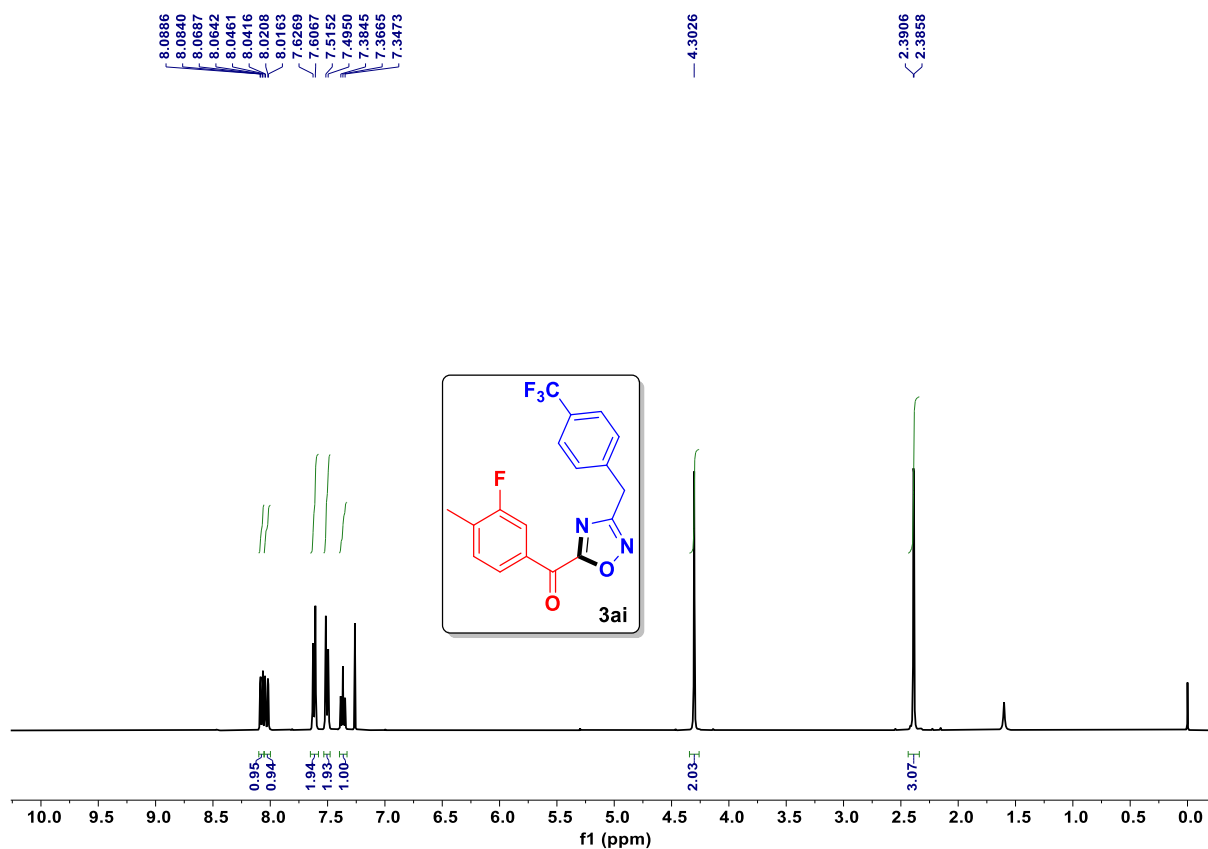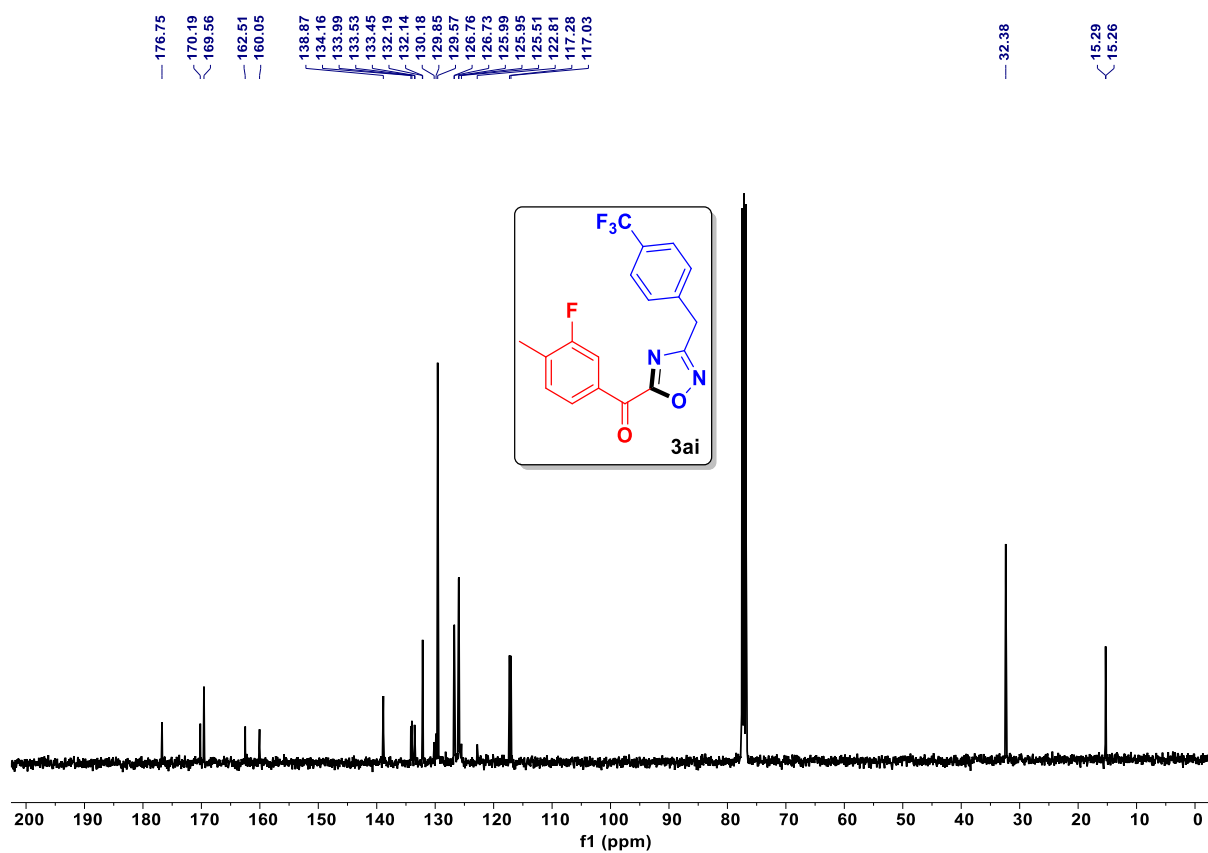

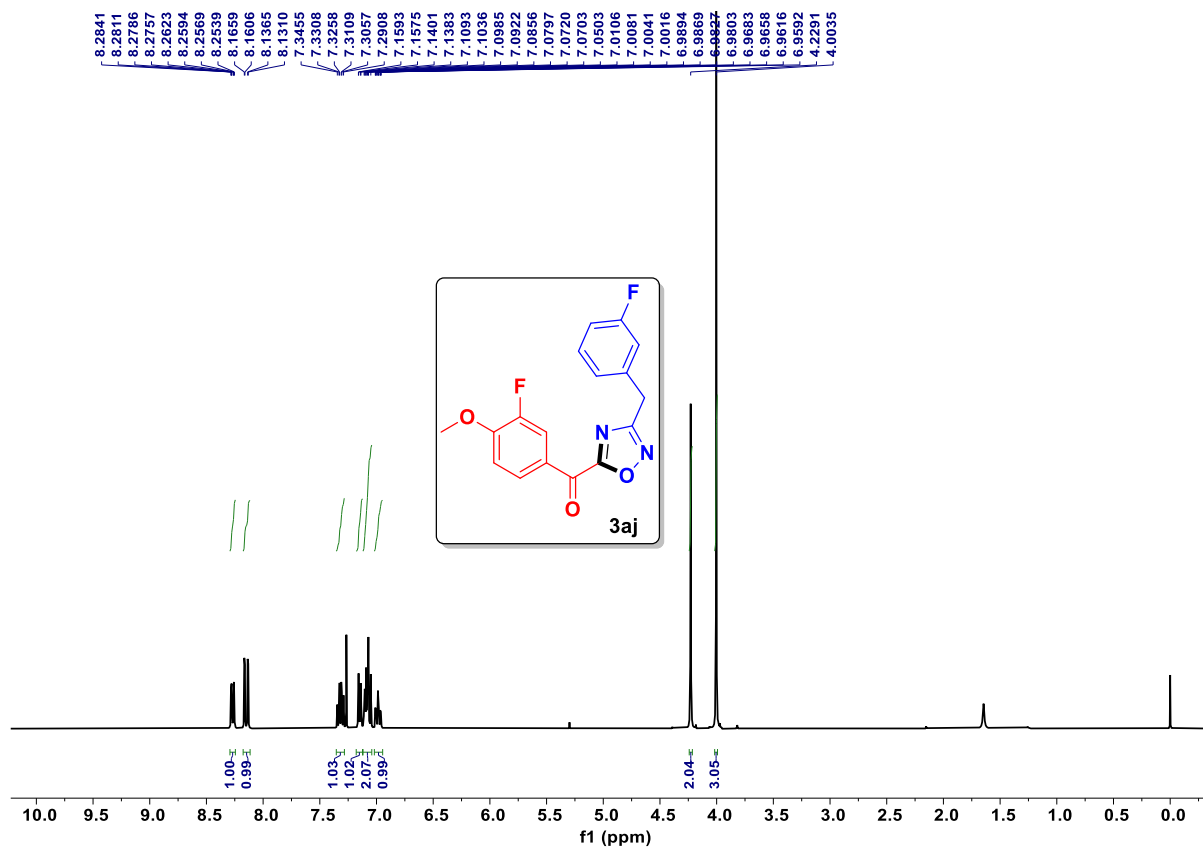

Figure 79. <sup>1</sup>H NMR (400 MHz, CDCl<sub>3</sub>) of compound **3aj**

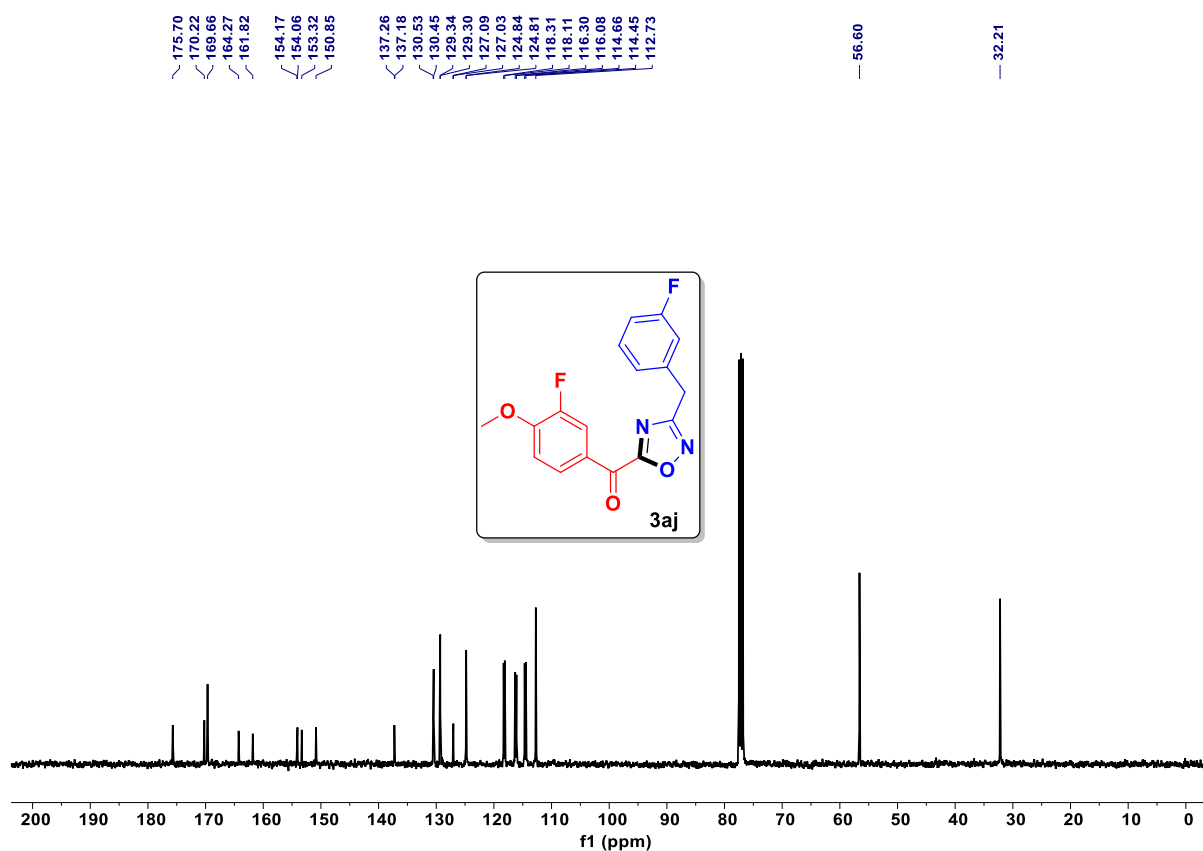

Figure 80. <sup>13</sup>C {<sup>1</sup>H} NMR (100 MHz, CDCl<sub>3</sub>) of compound **3aj**

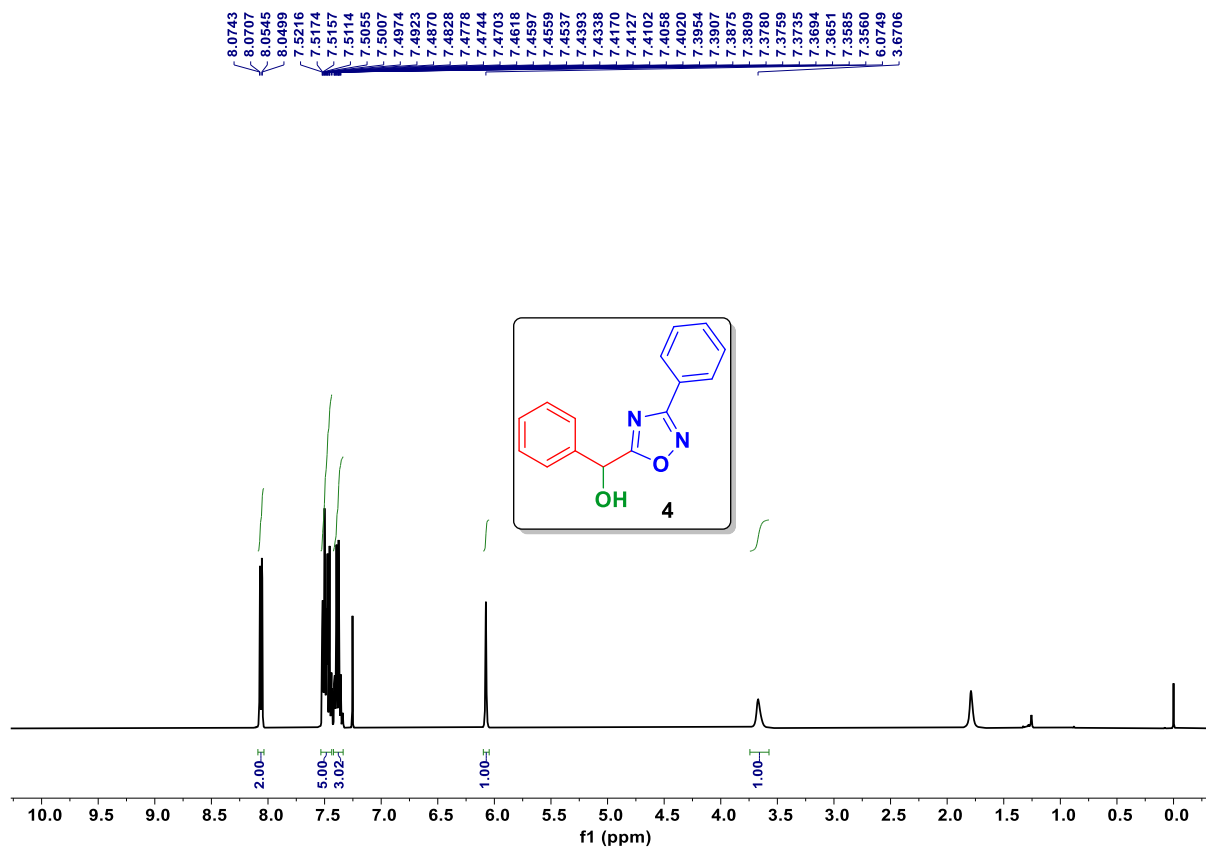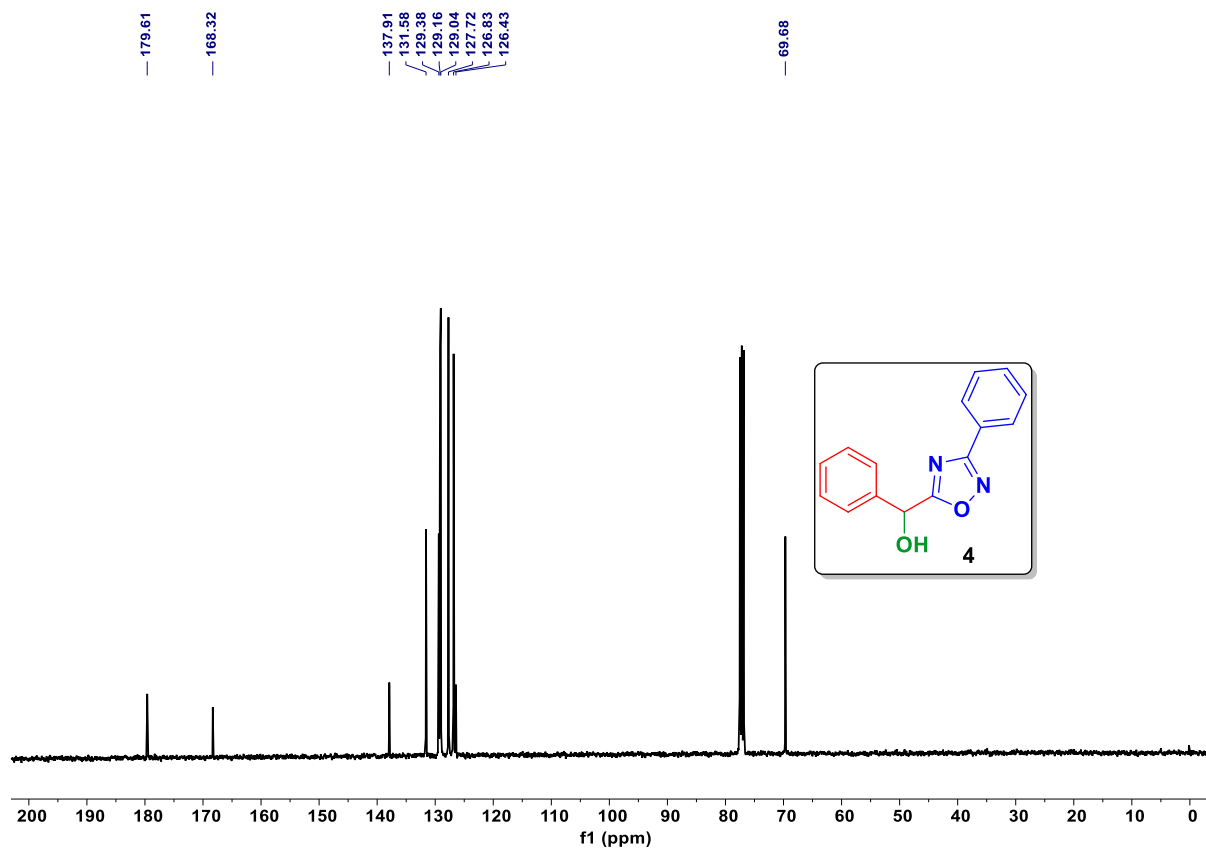

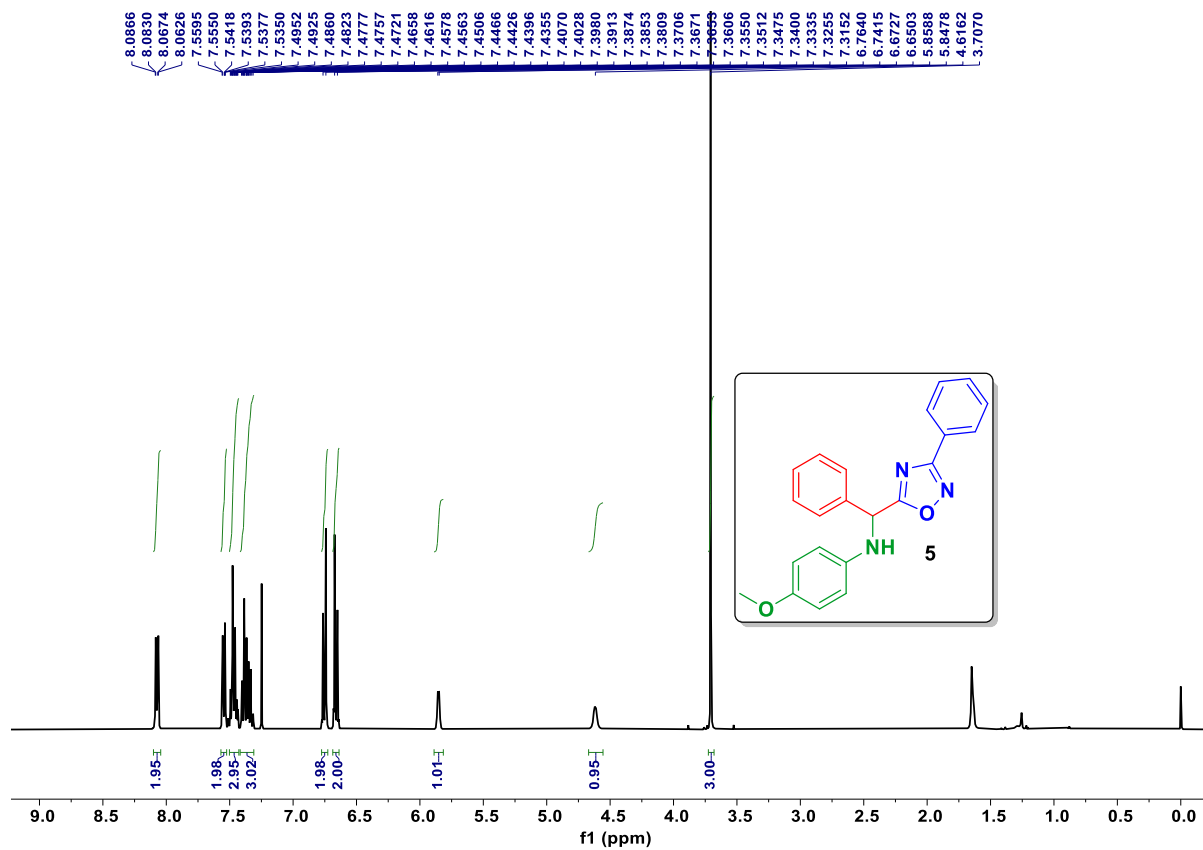

Figure 83.  $^1\text{H}$  NMR (400 MHz,  $\text{CDCl}_3$ ) of compound 5

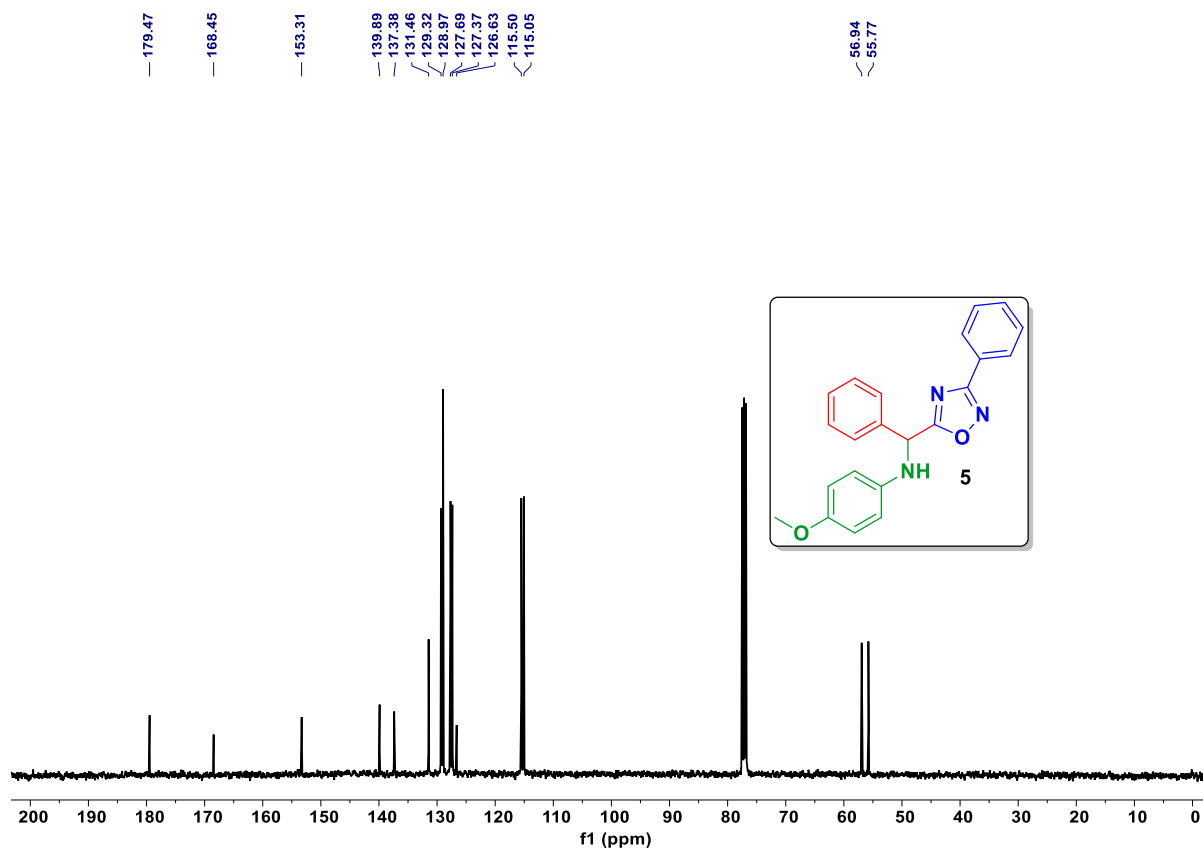

Figure 84.  $^{13}\text{C}\{^1\text{H}\}$  NMR (100 MHz,  $\text{CDCl}_3$ ) of compound 5



## X-Ray crystal structure of compound 3y

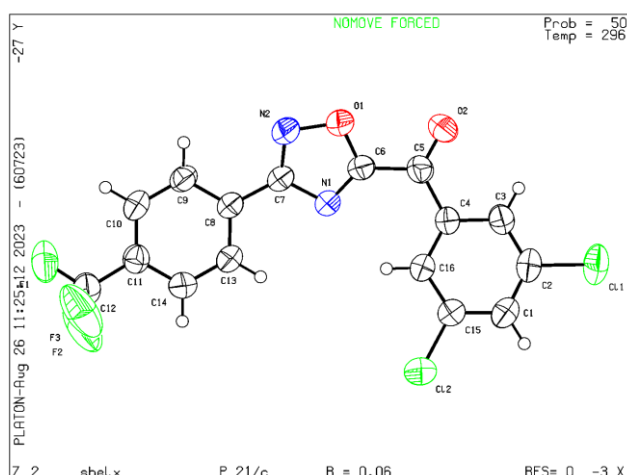

**Figure 85.** X-Ray crystal structure of compound 3y

|                                                       |                                                                                                                          |
|-------------------------------------------------------|--------------------------------------------------------------------------------------------------------------------------|
| Table 1. Crystal data and structure refinement for 3y |                                                                                                                          |
| Identification code                                   | shelx                                                                                                                    |
| Empirical formula                                     | C <sub>16</sub> H <sub>7</sub> Cl <sub>2</sub> F <sub>3</sub> N <sub>2</sub> O <sub>2</sub>                              |
| Formula weight                                        | 387.14                                                                                                                   |
| Temperature                                           | 296(2) K                                                                                                                 |
| Wavelength                                            | 0.71073 Å                                                                                                                |
| Crystal system, space group                           | Monoclinic, P 2 <sub>1</sub> /c                                                                                          |
| Unit cell dimensions                                  | a = 7.6950(5) Å    alpha = 90 deg.<br>b = 13.3275(11) Å    beta = 93.638(4) deg.<br>c = 15.5682(14) Å    gamma = 90 deg. |
| Volume                                                | 1593.4(2) Å <sup>3</sup>                                                                                                 |
| Z, Calculated density                                 | 4, 1.614 Mg/m <sup>3</sup>                                                                                               |
| Absorption coefficient                                | 0.453 mm <sup>-1</sup>                                                                                                   |
| F(000)                                                | 776                                                                                                                      |
| Crystal size                                          | 0.500 x 0.400 x 0.300 mm                                                                                                 |
| Theta range for data collection                       | 2.622 to 28.405 deg.                                                                                                     |
| Limiting indices                                      | -10 ≤ h ≤ 9, -16 ≤ k ≤ 17, -20 ≤ l ≤ 19                                                                                  |
| Reflections collected / unique                        | 17321 / 3971 [R(int) = 0.0347]                                                                                           |
| Completeness to theta = 25.242                        | 99.9 %                                                                                                                   |
| Absorption correction                                 | Semi-empirical from equivalents                                                                                          |
| Max. and min. transmission                            | 0.876 and 0.805                                                                                                          |
| Refinement method                                     | Full-matrix least-squares on F <sup>2</sup>                                                                              |
| Data / restraints / parameters                        | 3971 / 0 / 226                                                                                                           |
| Goodness-of-fit on F <sup>2</sup>                     | 1.022                                                                                                                    |
| Final R indices [I > 2σ(I)]                           | R <sub>1</sub> = 0.0592, wR <sub>2</sub> = 0.1628                                                                        |
| R indices (all data)                                  | R <sub>1</sub> = 0.1071, wR <sub>2</sub> = 0.1949                                                                        |
| Extinction coefficient                                | n/a                                                                                                                      |
| Largest diff. peak and hole                           | 0.683 and -0.406 e.Å <sup>-3</sup>                                                                                       |

## X-Ray crystal structure of compound 3ag

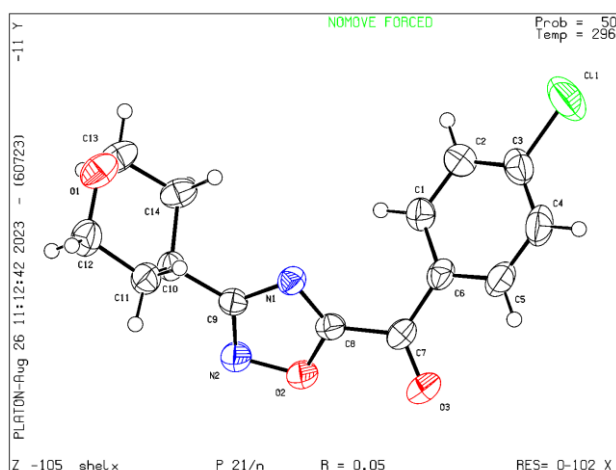

**Figure 86.** X-Ray crystal structure of compound **3ag**

Table 1. Crystal data and structure refinement for **3ag**

|                                   |                                                                                                                      |
|-----------------------------------|----------------------------------------------------------------------------------------------------------------------|
| Identification code               | shelx                                                                                                                |
| Empirical formula                 | C <sub>14</sub> H <sub>13</sub> Cl N <sub>2</sub> O <sub>3</sub>                                                     |
| Formula weight                    | 292.71                                                                                                               |
| Temperature                       | 296(2) K                                                                                                             |
| Wavelength                        | 0.71073 Å                                                                                                            |
| Crystal system, space group       | Monoclinic, P 2 <sub>1</sub> /n                                                                                      |
| Unit cell dimensions              | a = 6.9833(6) Å    alpha = 90 deg.<br>b = 7.9155(7) Å    beta = 91.509(5) deg.<br>c = 24.658(2) Å    gamma = 90 deg. |
| Volume                            | 1362.5(2) Å <sup>3</sup>                                                                                             |
| Z, Calculated density             | 4, 1.427 Mg/m <sup>3</sup>                                                                                           |
| Absorption coefficient            | 0.289 mm <sup>-1</sup>                                                                                               |
| F(000)                            | 608                                                                                                                  |
| Crystal size                      | 0.400 x 0.300 x 0.200 mm                                                                                             |
| Theta range for data collection   | 2.703 to 28.381 deg.                                                                                                 |
| Limiting indices                  | -9 ≤ h ≤ 9, -10 ≤ k ≤ 8, -32 ≤ l ≤ 32                                                                                |
| Reflections collected / unique    | 15969 / 3330 [R(int) = 0.0364]                                                                                       |
| Completeness to theta = 25.242    | 99.9 %                                                                                                               |
| Absorption correction             | Semi-empirical from equivalents                                                                                      |
| Max. and min. transmission        | 0.944 and 0.893                                                                                                      |
| Refinement method                 | Full-matrix least-squares on F <sup>2</sup>                                                                          |
| Data / restraints / parameters    | 3330 / 0 / 181                                                                                                       |
| Goodness-of-fit on F <sup>2</sup> | 0.990                                                                                                                |
| Final R indices [I > 2σ(I)]       | R <sub>1</sub> = 0.0468, wR <sub>2</sub> = 0.1193                                                                    |
| R indices (all data)              | R <sub>1</sub> = 0.0732, wR <sub>2</sub> = 0.1373                                                                    |
| Extinction coefficient            | n/a                                                                                                                  |
| Largest diff. peak and hole       | 0.232 and -0.401 e.Å <sup>-3</sup>                                                                                   |
